# Supplementary material for: Crosstalk of two-component signal transduction systems in regulating central carbohydrate and energy metabolism during autotrophic and photomixotrophic growth of Synechocystis sp. PCC 6803
Source: Royal Society of Chemistry journal article supplement (doi:10.1039/c7ib00049a), 2017-01-01
Supplement: c7ib00049a2.xlsx [file c7ib00049a2.xlsx]

## Sheet: Suppl. Table S1
Suppl. Table S1 Information of response regulator knock-out mutants and their segration.
RRs list	RR ID	RR symbol	Symbol	HK ID	HK symbol	Segregated	Family	Physiological process*	Reference**
RR1	slr1783	rre1	ycf29	slr1393	hik1	Full knockout	NarL	LT, HS, HO, HT, HP	(Paithoonrangsarid et al., 2004; Kanesaki et al., 2007; Marin et al., 2003; Shoumskaya et al., 2005; Suzuki et al., 2005)
RR2	sll1673	rre2		slr1147	hik2	Full knockout	Unknown	-	-
RR3	sll0649	rre3		sll1124	hik3	Full knockout	OmpR	HS, HO, Cadmium tolerance and metal homeostasis	(Shoumskaya et al., 2005; Chen et al., 2014c)
RR4	slr0687	rre4	pleD	sll1228	hik4	Full knockout	Unknown	-	-
RR5	slr1594	rre5	ndhR	sll1888	hik5	Full knockout	PatA	Inorganic carbon uptake	(Wang et al, 2004)
RR6	slr1041	rre6/PilG	pilG	sll1871	hik6	Full knockout	PatA	-	-
RR7	slr1042	rre7/PilH	pilH	sll0337	hik7/PhoR	Full knockout	CheY	-	-
RR8	slr1760	rre8		sll0750	hik8/SasA	Full knockout	Unknown	Cell cycle response sensor, respiration, carbonphotosynthesis, assimilation, and pH homeostasis, UV-B Stress	(Cadoret et al., 2005; Nodop et al., 2006)
RR9	slr1909	rre9		slr0210	hik9	Full knockout	NarL	Acid tolerance	(Ren et al., 2014)
RR10	slr1037	rre10		slr0533	hik10	Full knockout	CheY	Butanol tolerance	(Chen et al., 2014a)
RR11	sll1292	rre11/PilH	taxY	slr1414	hik11	Full knockout	CheY	Early response to inorganic limitation	(Wang et al., 2004)
RR12	sll1291	rre12/PilG		sll1672	hik12	Full knockout	PatA	-	-
RR13	slr2024	rre13		sll1003	hik13	Full knockout	CheY	HL, redox sensor	(Cadoret et al., 2005; Ivleva et al., 2006; Montgomery & Lagarias, 2002; Singh et al., 2008; Wang et al., 2004)
RR14	slr1213	rre14	nixB uirR	slr1759	hik14	Full knockout	AraC	Negative phototaxis	(Song et al, 2011)
RR15	slr1214	rre15/PilG	nixC lsiR	sll1353	hik15	Full knockout	PatA	Negative phototaxis	(Song et al, 2011)
RR16	slr1837	rre16/ManR	manR	slr1805	hik16	Full knockout	OmpR	Mn2+ deficiency	(Ogawa et al., 2002; Yamaguchi et al., 2002)
RR17	sll1708	rre17		sll1687	hik17	Full knockout	NarL	HP, HS, HO	(Kanesaki et al., 2007; Marin et al., 2003; Shoumskaya et al., 2005)
RR18	sll1624	rre18		sll0043	hik18/PixL	Full knockout	Unknown	cAMP and cGMP	(Ochoa de Alda & Houmard, 2000)
RR19	sll1592	rre19		sll1905	hik19	Full knockout	NarL	K+ deficiency	(Jung et al., 2000)
RR20	slr2100	rre20		sll1590	hik20	Full knockout	Unknown	UV-B Stress	(Cadoret et al., 2005)
RR21	slr1982	rre21		slr2098	hik21	Full knockout	CheY	-	-
RR22	slr1983	rre22		slr2104	hik22	Full knockout	Unknown	-	-
RR23	sll1879	rre23	ycf55	slr1324	hik23	Partial knockout	Unknown	-	-
RR24	slr1693	rre24	pixE	slr1969	hik24/CikA	Full knockout	PatA	Phototaxis	(Tanaka et al, 2012)
RR25	sll0921	rre25		slr0222	hik25	Partial knockout	NarL	-	-
RR26	slr0947	rre26/RpaB	rpaB	slr0484	hik26	Partial knockout	OmpR	Drug, LT, HL, NS, HP, HS, HO	(Hsiao et al., 2004; Kanesaki et al., 2007; Mikami et al., 2002; Morrison et al., 2005; Shoumskaya et al., 2005; Suzuki et al., 2000a, 2001)
RR27	slr0474	rre27	rcp1	slr0640	hik27/ManS	Full knockout	CheY	Phytochrome; Red, far-red light sensor	(Hubschmann et al., 2005)
RR28	sll0396	rre28		sll0474	hik28/Rcp1	Full knockout	OmpR	-	-
RR29	slr0081	rre29/PhoB	hisB	slr0311	hik29	Full knockout	OmpR	Phosphate deficiency	(Hirani et al., 2001)
RR30	sll0485	rre30		sll0798	hik30/NrsS	Full knockout	NarL	-	-
RR31	slr0115	rre31/RpaA	rpaA	sll0790	hik31	Full knockout	OmpR	Circadian rhythm sensor, heterotrophic survival,sugar catabolism and anabolism; Drug, LT, HL, NS, HP, HS, HO	(Hsiao et al., 2004; Kanesaki et al., 2007; Mikami et al., 2002; Morrison et al., 2005; Shoumskaya et al., 2005; Suzuki et al., 2000a, 2001)
RR32	slr0312	rre32		sll1473	hik32	Full knockout	NarL	-	-
RR33	sll0797	rre33/NrsR	nrsR	sll0698	hik33/NblS	Full knockout	OmpR	Excess nickel ions, redox sensor	(Li & Sherman, 2000; Lopez-Maury et al., 2002; Wang et al., 2004)
RR34	sll0789	rre34	copR	slr1285	hik34	Full knockout	OmpR	-	-
RR35	sll0039	rre35/PixH	pixH	slr0473	hik35/Cph1	Full knockout	CheY	CheA positive phototactic movement sensor; Butanol tolerance	(Bhaya et al., 2001; Yoshihara et al., 2000; Niu et al. 2014)
RR36	sll0038	rre36/PixG	pixG	slr0073	hik36/ChpA	Full knockout	PatA	CheA positive phototactic movement sensor	(Bhaya et al., 2001; Yoshihara et al., 2000)
RR37	sll1330	rre37	atpE	sll0094	hik37	Full knockout	OmpR	Glycolytic metabolism	(Tabei et al. 2007; Okada et al 2015)
RR38	slr1584	rre38	ccaR	slr1400	hik38	Full knockout	OmpR	HL	(Murata & Suzuki, 2006)
RR39	slr1588	rre39	ssp2	sll1296	hik39/ChpA	Full knockout	Unknown	Salt tolerance, glucosylglycerol metabolism	(Chen et al. 2014b)
RR40	sll1544	rre40		slr2099	hik40	Full knockout	NarL	-	-
RR41	slr1305	rre41	nifL	sll1229	hik41	Full knockout	Unknown	-	-
RR42	slr2041	rre42	divK	sll1555	hik42	Full knockout	Unknown	-	-
RR43	sll5059	crr43		slr1212	hik44	Full knockout	Unknown	-	-
RR44	slr6040	crr44	pcopR	slr0322	hik43/ChpA	Full knockout	OmpR	Heterotrophic metabolism	(Nagarajan et al, 2012)
RR45	slr6001	chy46		slr6001	-	-	Unknown	-	-
*Abbreviation: Highlight stress (HL); High-salt stress (HS); High-temperature stress (HT) ; Hydrogen peroxide stress (HP) ; Hyper-osmotic stress (HO); Low-temperature stress (LT); Nutrient starvation(NS);
**For references missing in manucript, please check the work of Liu et al. (2013)
