# Supplementary material for: Crosstalk of two-component signal transduction systems in regulating central carbohydrate and energy metabolism during autotrophic and photomixotrophic growth of Synechocystis sp. PCC 6803
Source: Royal Society of Chemistry journal article supplement (doi:10.1039/c7ib00049a), 2017-01-01
Supplement: c7ib00049a3.xlsx [file c7ib00049a3.xlsx]

## Sheet: Suppl. Table S2
Suppl. Table S2 Metabolite-specific collisional mass spectrometric parameters used in multiple reaction monitoring.
Metabolite	Abbrev.	MW1	(M-H)-	FV2(V)	Product ion	Product fromula	CV3(V)
Acetyl coenzyme A	AcCOA	809.57	808	260	79	[PO3]-	130
reduced α-nicotinamide adenine dinucleotide phosphate	NADPH	833.35	744	200	79	[PO3]-	112
α-nicotinamide adenine dinucleotide phosphate	NADP	787.37	742	140	620	-nicotinamide	8
reduced α-nicotinamide adenine dinucleotide	NADH	709.4	664	190	79	[PO3]-	108
α-Nicotinamide adenine dinucleotide	NAD	685.41	662	100	540	-nicotinamide	8
Adenosine-5’-diphosphoglucose	ADP-GCS	633.31	588	170	346	AMP	20
Uridine 5’-diphosphoglucose	UDP-GCS	610.27	565	160	323	UMP	10
Adenosine 5’-triphosphate	ATP	551.14	506	142	79	[PO3]-	92
Adenosine 5’-diphosphate	ADP	501.32	426	150	79	[PO3]-	60
Coenzyme A hydrate	COA	767.53	382.5	110	79	[PO3]-	68
Adenosine 5’-monophosphate	AMP	347.22	346	140	79	[PO3]-	45
D-Fructose 1,6-bisphosphate	FBP	406.06	339	110	97	[H2PO4]-	18
D-Ribulose 1,5-bisphosphate	RiBP	310.09	309	104	97	[H2PO4]-	14
D-Fructose 6-phosphate	F6P	304.1	259	86	97	[H2PO4]-	4
D-Glucose 6-phosphate	G6P	304.1	259	100	97	[H2PO4]-	4
D-Ribose 5-phosphate	R5P	310.1	229	78	97	[H2PO4]-	12
D-(−)-3-Phosphoglyceric acid	3PG	230.02	185	84	97	[H2PO4]-	4
Dihydroxyacetone phosphate	DHAP	180.19	169	84	97	[H2PO4]-	4
DL-Glyceraldehyde 3-phosphate	GAP	170.06	169	66	97	[H2PO4]-	8
Phospho(enol)pyruvic acid	PEP	190.02	167	82	79	[PO3]-	4
L-Glutamic acid	GLU	187.13	145	80	127	[C5H8N2O2]-	8
α-Ketoglutaric acid	AKG	226.09	145	60	101	[C4H5O3]-	6
Oxaloacetic acid	OXA	132.07	131	110	87	[C3H3O3]-	0
Sodium fumarate dibasic	FUM	160.04	115	58	71	[C3H3O2]-	0
1Molecular weight
2Fragmentation voltage at which maximal parent ion intensity is observed
3Collision cell voltage at which maximal product ion intensity is observed
