# Supplementary material for: Crosstalk of two-component signal transduction systems in regulating central carbohydrate and energy metabolism during autotrophic and photomixotrophic growth of Synechocystis sp. PCC 6803
Source: Royal Society of Chemistry journal article supplement (doi:10.1039/c7ib00049a), 2017-01-01
Supplement: c7ib00049a4.xlsx [file c7ib00049a4.xlsx]

## Sheet: Suppl. Table S3
Suppl. Table S3 The raw metabolome data of Synechocystis and RR mutants.
ID	Batch	Sample	AcCOA	NADPH	NADP	NADH	NAD	ADP-GCS	UDP-GCS	ATP	ADP	COA	AMP	FBP	RiBP	G6P	F6P	R5P	3PG	DHAP	GAP	PEP	GLU	AKG	OXA	FUM
1	1	wt1_48h_1	23.583	6.708	206.042	21.625	576.458	29.625	820.042	51.25	137.833	69.5	511.5	163.042	43.125	121.5	37.833	67.208	1119.88	477.333	71.167	1202	276.917	9062.83	251.75	4790
2	1	wt1_48h_2	20.792	16.833	181.875	21.917	586.125	27.167	691.333	40.792	109.583	68.792	433.833	152.292	25.5	93.542	39.292	85	1149.54	541.417	84.917	1297.54	279.667	10202.7	368.708	5958.5
3	1	wt1_48h_3	37.667	31	210.167	21.333	596.917	72.667	690.875	72.417	155	78.625	350.792	192.625	35.083	198.792	79.542	88.5	1111.5	636.208	97.083	1078.33	550.208	11801.8	344.292	6821.71
4	1	△sll0649_48h_1	27.3473	13.7414	61.9786	19.1518	509.562	42.1477	906.542	42.6017	47.9807	63.947	487.619	170.625	37	104.895	74.2314	62.083	424.702	510.931	77.3035	722.41	512.664	10117.1	405.349	5030.08
5	1	△sll0649_48h_2	17.1955	13.2051	69.7537	21.5195	732.022	45.9464	891.158	48.5508	82.697	78.019	466.549	162.583	20.625	151.771	65.9648	73.792	661.589	509.615	83.0296	1050.36	342.605	9978.39	412.834	5208.75
6	1	△sll0649_48h_3	16.2467	11.4476	69.6924	23.8166	509.346	45.4813	809.439	39.7224	73.5969	74.3039	465.74	181.865	29.2067	116.326	70.068	75.7933	760.249	492.775	63.5829	839.524	292.786	12244.8	340.757	5650.87
7	1	△slr1584_48h_1	22.7439	16.1064	167.336	14.8624	644.172	46.4934	668.928	38.4765	175.263	79.1165	260.086	132.218	29.2662	123.113	37.472	92.1508	1346.55	494.735	85.153	1466.29	326.968	10982.4	395.276	6595.67
8	1	△slr1584_48h_2	18.1587	14.1941	137.492	14.5117	514.337	33.4295	590.282	35.7756	92.3966	61.4265	241.527	161.902	40.9013	120.248	41.1834	91.0275	978.483	721.125	72.4855	1160.82	451.372	8814.63	293.7	6122.39
9	1	△slr1584_48h_3	18.2862	12.944	158.797	16.3905	529.205	50.6315	649.543	43.5847	124.944	65.0815	386.46	138.117	38.8577	113.124	36.1161	102.261	1449.94	615.429	70.0298	1445.67	329.593	8996.12	266.54	6005.73
10	1	△sll0789_48h_1	29.0685	11.6312	171.113	16.6575	623.9	58.7503	666.39	46.2574	177.838	54.4155	752.21	166.478	31.7152	151.518	37.1082	102.013	2100.56	411.521	112.109	1769.96	461.763	9041.06	345.838	5055.3
11	1	△sll0789_48h_2	33.1589	17.5518	199.759	21.5771	531.871	60.2451	531.91	59.7692	192.727	60.3897	398.331	165.228	26.3449	143.677	39.7456	110.041	2077.98	481.781	97.0866	1838.65	424.334	9593.73	367.082	5449.2
12	1	△sll0789_48h_3	35.364	21.4549	286.678	18.9589	610.355	39.68	533.829	78.4208	216.129	81.3032	363.668	181.336	23.5823	168.157	55.0144	114.716	1953.23	468.252	109.222	1605.54	430.819	8690.26	326.791	5529.7
13	1	△slr0081_48h_1	27.4727	17.499	148.817	24.8279	648.126	31.6168	1197.9	37.2793	112.971	79.5952	616.152	147.4	16.9279	122.317	76.946	69.7021	923.731	510.146	83.7498	722.152	481.781	9965.27	319.992	5595.78
14	1	△slr0081_48h_2	23.3536	12.6793	139.44	29.1433	598.507	41.5825	1234.16	40.5889	93.6789	68.7121	491.312	162.49	19.6905	128.959	66.9052	52.532	1006.61	625.938	114.848	637.393	463.599	8398.25	333.389	5421.65
15	1	△slr0081_48h_3	20.6264	19.8567	115.26	24.7705	570.013	27.0879	1077.29	33.4765	87.2792	72.7683	503.485	153.42	18.5231	119.917	65.5638	62.0815	1118.35	544.621	104.882	602.366	596.733	9045.48	348.145	5238.91
16	2	wt2_48h_1	42.792	24.625	538.958	19.042	757.833	14.042	627.5	445.708	369.583	31.125	253.375	90.083	16.833	55.875	36.5	32.75	1962.12	143.292	134.25	1542.71	506.375	9691.25	709.667	7703.54
17	2	wt2_48h_2	36.75	28.667	334.083	21.458	832.5	45.667	653.625	328.292	245.375	27.167	333.292	89.958	18.917	50.042	45.5	37.75	1149.71	164.75	154.792	1286.04	521.667	8952.88	978.125	7526.25
18	2	wt2_48h_3	38.292	43.458	558.333	23.458	875.542	39.375	652.375	379.25	537.417	30.417	433.833	90.625	15.292	79.625	49.083	33.208	1993.38	166	181.625	1906.04	709.333	8883.88	797.417	7625.04
19	2	△slr0115_48h_1	34.2006	25.9365	297.202	24.3731	466.887	24.7099	520.966	276.534	212.768	30.9507	134.667	56.3215	11.7313	71.8155	50.4806	25.9025	2044.89	184.602	113.659	428.369	263.765	9231.68	859.215	6997.5
20	2	△slr0115_48h_2	39.9486	38.1089	304.337	20.7089	514.352	27.0278	620.594	486.906	364.567	32.9003	154.368	70.8505	16.9494	53.8145	37.8248	22.0099	1466.51	203.796	131.274	454.325	138.871	10717.4	1111.09	8054.6
21	2	△slr0115_48h_3	36.6906	29.5198	327.725	19.7924	590.721	37.6439	692.775	553.062	444.485	37.9363	196.966	85.8534	16.9813	67.9053	33.7817	21.1448	1609.02	176.726	144.089	436.2	326.884	9422.87	741.318	6448.84
22	2	△slr1837_48h_1	30.7571	18.4716	805.059	23.5986	1060.59	26.2658	788.536	735.763	405.363	26.3855	115.171	95.1693	18.9368	116.476	55.7334	33.8327	1959.26	171.124	200.976	1962.29	861.052	8855.98	984.89	8194.89
23	2	△slr1837_48h_2	46.9581	19.551	415.463	19.2345	514.805	40.4747	628.113	708.305	401.149	27.4486	308.181	72.9075	18.0477	58.7257	33.0069	38.8329	1778.62	132.791	112.8	2278.45	583.74	10743.4	905.275	7217.51
24	2	△slr1837_48h_3	28.4531	30.3765	796.671	21.8082	922.879	21.07	797.917	905.827	485.668	29.9483	281.653	122.625	16.8693	104.835	50.9316	26.6253	2042.94	154.697	96.5451	3298.2	777.331	9781.4	944.827	7615.05
25	2	△slr6040_48h_1	86.2795	47.6226	367.687	10.6213	358.444	37.2782	471.428	3311.46	819.691	30.8401	324.182	272.169	19.8391	138.152	50.2205	66.911	2822.01	160.371	160.401	1612.02	896.173	8873.87	1728.15	9281.44
26	2	△slr6040_48h_2	57.187	14.6415	299.798	11.5139	384.677	25.0031	384.853	1931.44	369.225	28.2124	463.808	202.25	11.7468	281.178	73.0567	86.7854	2598.7	160.718	121.453	1565.03	1223.49	10005.8	1126.54	6050.87
27	2	△slr6040_48h_3	47.3923	21.324	418.604	11.0821	437.142	32.0806	615.719	2039.5	356.086	30.0283	217.381	238.24	18.7603	152.04	32.1296	47.0318	2630.74	245.85	108.155	1495.49	1550.82	7951.11	561.14	11069
28	2	△sll1592_48h_1	38.3589	33.5352	373.559	17.9384	832.96	18.6016	687.152	439.031	695.764	32.6315	366.938	109.183	12.5882	64.7008	63.6044	33.9844	1515.81	128.647	140.391	1130.22	504.686	10724.3	742.794	6455.16
29	2	△sll1592_48h_2	27.1257	30.8241	275.606	18.1308	632.746	42.8804	565.231	299.377	428.604	31.9214	519.843	91.4912	17.2945	64.3269	41.4808	34.4677	1511.7	118.279	128.098	1116.75	707.347	11710.2	680.356	6205.63
30	2	△sll1592_48h_3	31.5372	27.3088	597.174	24.3078	756.127	31.6771	638.163	380.8	637.726	34.4252	407.139	104.492	16.4385	79.5799	60.8914	39.5516	1545.85	122.517	115.747	1239.22	786.173	11148.6	670.866	5828.59
31	3	wt3_48h_1	21.042	8.333	181.333	34.958	238.625	25.5	268.667	100.583	146.625	31.5	126.958	821.833	44.75	41.75	46.042	53.792	517.833	107.042	101.125	653.417	143.208	7663.54	118.208	2903.33
32	3	wt3_48h_2	20.917	6.625	99.167	21.375	274.292	27.083	354.708	97.542	77.792	36.833	132.375	883.5	39.125	42.667	39.583	43.417	471.958	154.458	92.875	401.75	277.5	3777.29	152.167	3059.58
33	3	wt3_48h_3	24.167	10.667	205.042	25.5	251.958	8.625	351	219.75	103.375	40.167	120.208	873.833	44.875	47.042	41.542	37.958	1123.33	76.417	41.333	540.25	295.083	3519.71	175.417	3358.92
34	3	△slr1783_48h_1	28.4508	8.86642	230.067	27.5902	310.735	23.1522	303.932	188.163	155.077	39.2795	127.562	773.83	54.094	79.8805	40.0856	39.2447	928.609	92.2851	79.2305	711.025	290.248	4360.06	125.783	3299.1
35	3	△slr1783_48h_2	29.5215	7.53956	237.198	27.2188	276.206	21.8669	252.18	294.567	204.527	28.831	132.731	875.347	52.3569	40.092	36.0447	35.7846	928.959	107.639	75.6258	794.415	286.611	4367.26	151.75	3199.19
36	3	△slr1783_48h_3	34.7718	8.83888	207.122	28.8636	300.475	26.5473	279.076	238.767	170.699	33.4513	113.689	815.641	50.0302	46.9544	39.1655	33.6054	931.686	126.82	71.5548	762.125	241.492	4762.47	134.788	3136.52
37	3	△slr1909_48h_1	19.3876	13.9113	219.727	41.067	210.507	17.3784	256.535	126.948	107.014	40.9122	100.803	687.285	64.3171	34.4594	24.7334	38.2124	668.647	136.09	61.8722	489.472	215.444	4622.79	137.89	2870.59
38	3	△slr1909_48h_2	16.9973	12.6536	189.044	44.958	215.222	23.7659	266.674	148.807	117.373	26.0883	71.962	955.278	52.1886	47.0527	39.256	41.7679	777.474	120.964	86.7161	574.376	212.776	5145.12	123.76	2878.91
39	3	△slr1909_48h_3	22.6873	11.9832	245.671	46.0723	254.367	27.3336	285.349	178.626	104.865	42.7079	110.876	926.106	55.4522	42.6992	28.9548	42.8575	778.208	117.612	97.4355	720.237	244.286	5128.04	157.982	3399.85
40	3	△sll1544_48h_1	16.88	13.0643	187.847	25.6042	273.032	22.9586	330.89	168.358	109.135	33.717	132.05	856.939	37.0997	61.2601	43.7242	51.8355	660.726	168.504	125.627	554.578	355.459	5685.57	133.187	3129.65
41	3	△sll1544_48h_2	14.0233	16.6456	146.893	23.9823	282.141	21.6884	337.946	163.473	102.733	37.1148	146.575	719.63	34.9877	52.8364	41.1425	46.7509	1246.62	133.093	85.3542	685.017	278.72	5939.51	168.01	3257.93
42	3	△sll1544_48h_3	6.97818	9.53938	161.429	23.5383	244.191	23.0535	285.469	152.285	157.882	32.7976	175.961	932.087	31.2547	56.3673	36.5289	48.7222	1269.34	140.837	69.6339	687.927	354.394	6550.87	123.656	3258.08
43	3	△sll0921_48h_1	33.2243	11.9012	138.096	21.5611	248.494	21.1818	434.848	245.929	196.068	29.3117	116.173	1006.56	33.1895	124.185	122.637	49.9197	704.375	153.736	119.726	190.412	193.994	4215.35	144.872	2811.29
44	3	△sll0921_48h_2	44.8367	6.91468	278.857	25.2011	271.829	10.2141	477.609	236.358	174.184	30.6018	63.6126	958.477	32.7795	150.365	87.1382	43.1551	802.357	83.116	101.183	143.937	308.439	4083.92	180.96	2862.58
45	3	△sll0921_48h_3	24.4079	6.73391	97.078	22.733	217.515	28.6063	452.661	215.921	86.4226	29.3117	157.843	860.367	38.42	135.267	90.7664	57.9996	675.499	98.1404	73.2667	194.179	253.231	4106.41	183.003	3309.07
46	4	wt4_48h_1	26.5	45.833	451.292	46.958	493.083	23.917	473.667	222.833	456.292	19.375	238.917	114.333	29.042	201.833	112	32.792	1585.83	71.833	252.042	1253.58	591.375	6116.62	153	4851.54
47	4	wt4_48h_2	11.917	34.125	31.625	36.333	278.583	32	345.292	54.792	111.125	15.417	275.417	88.333	20.833	145.708	99.833	38.958	808.333	51.833	147.042	821.083	637.083	5858.29	138.708	4088.17
48	4	wt4_48h_3	22.833	33.917	177.5	37.25	479.083	36.75	501.417	74.292	250.75	14.708	271.25	90.333	23.75	191.25	108.333	28.167	819.333	54.375	184	1049.21	799.667	5734.75	152.042	4410.92
49	4	△slr0474_48h_1	15.7936	38.0336	741.576	39.9262	862.084	43.8007	516.538	112.542	423.515	19.4762	244.471	104.151	28.3785	207.861	126.172	30.0844	1075.68	63.6414	152.907	860.985	691.691	6610.08	179.83	3971.82
50	4	△slr0474_48h_2	16.2872	38.7851	525.4	39.1436	1080.69	57.4898	547.237	95.6458	419.322	19.38	279.903	106.013	30.5772	204.033	127.955	36.9582	1160.02	64.6716	170.748	877.83	596.923	5921.36	201.937	4126.18
51	4	△slr0474_48h_3	16.6492	37.7327	414.023	39.5784	845.268	60.2263	493.847	118.506	360.617	19.2298	177.152	99.2205	27.0998	237.469	110.109	33.8268	922.29	62.6106	191.134	1083.72	762.495	5883.35	187.378	3614.61
52	4	△sll1292_48h_1	42.8729	88.4392	170.732	59.2117	338.108	39.8322	454.741	7.1333	293.525	20.7331	276.182	107.556	14.8689	172.815	55.6033	26.6801	1051.47	62.3527	267.331	705.258	1081.33	6383.17	136.854	4121.14
53	4	△sll1292_48h_2	41.2608	99.1576	190.047	48.8989	354.025	18.3409	487.241	7.04926	280.597	22.1877	239.246	122.956	12.1906	187.921	70.5692	35.9373	1081.29	72.4786	184.51	754.482	1230.88	6394.47	148.554	4123.41
54	4	△sll1292_48h_3	41.2936	92.077	190.752	54.9607	374.989	17.3849	444.196	7.89791	300.095	20.2057	222.326	98.5027	16.1879	171.002	68.5098	36.754	1132.05	69.3354	211.012	732.583	1140.69	5808.55	145.185	3728.7
55	4	△slr1037_48h_1	11.1524	36.536	322.602	37.8055	546.873	27.9154	501.247	107.405	280.086	15.5219	210.97	92.5222	21.2876	182.259	107.982	29.2427	1642.88	62.3316	167.641	1246	626.461	6882.57	133.125	4001.97
56	4	△slr1037_48h_2	20.7241	43.8367	336.835	34.718	601.385	23.223	480.296	96.1399	302.956	12.3296	261.835	103.174	25.4773	160.651	98.1775	28.6843	1172.6	55.4736	164.994	1206.01	906.975	6700.99	107.674	4773.18
57	4	△slr1037_48h_3	15.4405	44.1287	250.081	36.5706	398.96	19.4477	411.248	97.0731	248.327	15.516	201.175	113.145	23.3402	153.486	80.8129	31.4724	1255.97	52.0821	130.078	1242.32	1207.41	5524.87	119.483	4758.49
58	4	△slr1042_48h_1	20.8729	41.1148	195.268	37.3292	566.103	43.2626	343.595	114.332	263.687	16.9164	322.537	106.135	24.1841	174.403	92.1008	86.4189	1405.54	150.908	174.526	2001.98	429.404	4741.38	102.763	4064.48
59	4	△slr1042_48h_2	17.8312	51.7502	132.593	40.5866	605.652	38.0382	365.212	93.1591	207.307	15.07	266.147	70.7899	23.4684	129.364	56.4999	84.3462	1129.32	139.713	169.034	2202.18	602.036	5511.41	133.441	4378.3
60	4	△slr1042_48h_3	23.9146	30.479	238.19	34.0718	526.554	48.4871	321.977	124.694	276.56	15.7141	278.081	117.38	24.8997	219.446	95.9824	88.4916	1459.8	162.102	191.618	2454.8	440.691	5613.93	135.458	4919.42
61	5	wt5_48h_1	54.583	94.625	43.625	118.875	139.583	12	288.125	53.333	63.667	134.75	167.208	96.583	33.833	54.417	21.75	35.875	212.708	80.792	82.75	155	138.292	1554.29	84.833	2124.54
62	5	wt5_48h_2	52.333	93.333	32.833	118.958	114.833	19.417	198.75	56.125	67.458	124.125	187.875	81.375	40.208	50.458	20.375	26.958	184.708	56.5	48.232	186.333	97.875	2117.71	101.708	1668.25
63	5	wt5_48h_3	67.458	104.5	47.792	95.625	72.542	15.333	142.542	44.917	59.708	123.25	149.333	110.833	52.167	41.292	18.125	39.417	564.083	57.417	62.12	432.458	137.083	1539	55.542	2039.67
64	5	△slr2024_48h_1	31.9302	23.3808	10.2508	95.7462	58.9149	6.84393	192.626	29.9976	27.2318	100.861	112.614	75.3646	44.1136	47.5444	8.11416	46.0809	311.959	35.5268	73.4624	353.365	78.9554	1714.89	87.1569	1926.76
65	5	△slr2024_48h_2	42.7551	47.163	23.924	141.317	79.4301	18.9126	165.409	66.2793	62.9625	112.149	181.79	80.2647	35.9357	32.8914	12.3111	23.8438	291.925	49.3802	59.3141	315.653	39.4423	1811.82	58.6132	1764.53
66	5	△slr2024_48h_3	57.5298	104.877	19.4335	135.937	99.1133	20.4386	210.525	50.0754	34.2931	105.5	161.394	70.4668	44.6767	41.1395	12.6529	26.4793	285.063	75.1954	55.3733	333.909	58.0658	1833.3	70.7459	1879.4
67	5	△slr1982_48h_1	25.3453	83.9668	61.3825	103.701	70.7342	17.1399	266.196	50.9171	56.3056	156.238	137.88	74.1969	34.5531	84.0729	29.2619	17.0758	324.817	182.522	70.3211	195.284	101.455	1427.86	118.656	2612.44
68	5	△slr1982_48h_2	51.6448	211.805	39.7784	129.662	155.354	13.1327	391.403	56.3656	88.1944	117.693	78.8107	83.9983	25.7749	143.097	23.264	36.0888	271.491	133.191	64.6802	181.341	133.482	1207.77	37.5727	2155.29
69	5	△slr1982_48h_3	32.8092	125.912	42.2299	140.467	82.3099	14.025	263.04	51.3717	45.0277	131.497	109.542	56.3989	37.2217	151.543	26.9445	23.4787	318.495	135.513	80.1	128.646	212.572	1193.19	81.498	2388.7
70	5	△sll0038_48h_1	43.0426	85.0248	33.0254	118.912	152.449	11.8818	435.574	33.9789	46.4026	103.092	180.901	92.4384	20.9607	51.0591	22.2914	53.5615	212.7	61.4732	66.0973	123.101	275.76	1544.08	70.0311	2078.18
71	5	△sll0038_48h_2	49.6947	70.5117	30.6332	128.93	119.574	10.5484	266.816	28.9246	66.5748	183.818	215.956	100.038	24.2116	64.724	23.3255	36.2957	201.357	64.0725	51.3545	116.383	201.5	1627.13	79.8122	2202.06
72	5	△sll0038_48h_3	48.1474	93.6206	39.5361	107.31	99.8024	10.6511	320.185	32.9906	62.695	115.511	192.513	76.9339	23.1589	61.8982	21.4709	40.6484	191.581	62.463	52.9622	104.659	201.973	1618.58	70.1305	2114.09
73	5	△sll1291_48h_1	72.1288	79.9192	56.9393	142.955	67.695	17.2644	172.744	87.301	51.8364	127.025	98.3918	106.639	48.9901	31.3096	20.0747	42.139	221.257	65.6541	62.4539	307.384	82.1915	1569.14	79.8657	1907.64
74	5	△sll1291_48h_2	68.8499	186.865	61.1833	141.031	90.553	15.1928	201.375	73.3154	59.8564	131.263	124.554	95.4481	46.9346	38.8501	18.5245	34.6868	244.967	49.0294	64.1432	205.85	109.656	1350.94	82.9545	1806.92
75	5	△sll1291_48h_3	71.1913	111.964	50.1314	146.351	109.309	20.0255	203.92	93.774	102.695	137.436	116.706	97.088	41.2466	33.9324	21.1337	33.0854	303.069	54.5241	45.1536	232.462	109.696	1709.14	64.672	1476.96
76	6	wt6_48h_1	54.708	495.208	27.542	277.417	29.625	4.917	90.042	31.958	53	320.25	57.292	28.792	26.833	105.917	45.792	62.25	2026.88	40.667	28.292	87.167	17.458	712.958	105.208	1236.33
77	6	wt6_48h_2	117.833	415.875	25.792	345.083	20.708	8.833	52.708	45.667	69.917	249	31.917	35.5	33.042	16.042	6.083	68.667	1369.62	31.833	21.125	209.083	11.625	495.292	72.625	803.167
78	6	wt6_48h_3	55.917	134.5	5.125	228.292	18.958	2.123	55.167	36.792	54.5	266.292	46.292	67.583	29.938	15.708	6.417	72.833	1547.12	27.417	19.625	86.917	26.167	575.833	90	932.25
79	6	△slr1214_48h_1	69.875	252.612	25.0596	288	37.667	10.7607	62.0157	55.7868	81.182	260.425	42.972	37.8256	187.813	48.5681	29.3766	54.458	1536.98	50.8695	21.7795	170.872	7.83192	574.449	67.4348	845.757
80	6	△slr1214_48h_2	78.417	356.428	23.9269	257.792	15.25	11.445	43.1438	40.4828	63.2191	192.288	44.5023	40.5744	248.364	35.5477	24.6652	71.75	1533.34	36.3294	14.471	211.895	8.99419	705.237	80.7219	845.468
81	6	△slr1214_48h_3	59.542	339.374	29.1953	310.375	29.833	5.34583	46.3784	44.8257	72.8374	253.03	51.0583	34.8346	106.904	54.907	23.0024	39.667	1679.19	30.774	18.0761	278.62	16.887	587.073	80.8954	925.729
82	6	△slr1594_48h_1	50.333	301.041	16.7336	244.458	36.042	5.2093	78.6328	35.6745	59.9485	275.611	46.4083	38.5804	14.7991	58.3034	22.355	55.208	1326.76	39.0639	20.2687	88.2915	18.2329	539.18	72.6713	977.054
83	6	△slr1594_48h_2	53.875	384.198	7.20669	342.417	29.625	8.63557	84.3891	20.5001	51.5802	315.565	54.7837	44.1857	14.0869	82.078	28.9154	70.667	1166.63	49.8715	18.807	78.6567	19.3959	729.78	69.9445	1296.17
84	6	△slr1594_48h_3	80.5515	272.817	9.29499	342.833	20.875	2.35056	60.5622	36.3985	58.5536	293.729	38.9867	27.1603	13.3729	45.5113	20.4151	63.875	1346.59	33.6814	14.2157	74.7332	10.6212	595.548	74.3593	1132.09
85	6	△slr1041_48h_1	72.8402	208.626	11.2426	288.463	21.221	10.0364	65.2425	26.4222	52.4546	196.091	59.7206	35.3118	30.7652	39.7261	18.1356	49.9512	1611.45	27.2321	19.7259	93.5365	21.8209	512.168	98.1725	956.628
86	6	△slr1041_48h_2	59.0067	151.713	22.5324	271.932	33.942	4.70375	95.8889	25.494	66.4537	277.213	89.7259	24.7746	38.1366	44.3379	14.5732	39.3739	1792.89	43.0602	34.9394	138.257	18.3893	588.793	76.4401	940.057
87	6	△slr1041_48h_3	86.0531	256.874	27.2939	370.254	30.7909	7.05511	76.7551	31.0234	72.7195	261.257	58.4616	45.8478	23.3958	49.4807	23.9648	80.9567	1656.76	33.5893	26.2045	146.014	25.1801	609.383	62.1663	978.694
88	6	△slr1693_48h_1	79.2203	166.91	17.6766	325.383	28.6708	5.33367	62.0583	48.6874	72.5924	191.314	44.4351	37.1625	41.9742	74.9308	29.0076	58.5678	1644.86	35.8835	25.5494	121.137	17.1477	738.945	77.4014	946.686
89	6	△slr1693_48h_2	63.5234	226.902	24.6366	435.638	19.9762	3.4123	65.1564	48.4801	65.3391	163.961	34.6714	51.0588	20.9955	63.8908	26.4477	82.9292	1638.31	34.3436	25.9137	134.447	15.7569	637.786	67.4973	932.52
90	6	△slr1693_48h_3	80.463	200.146	13.5559	472.623	27.024	6.79989	64.1237	40.6207	44.7352	300.756	37.8497	44.1101	25.2818	58.8363	15.6242	107.291	1187.03	36.5717	18.4775	87.794	15.6461	657.356	93.1323	987.242
91	7	wt7_48h_1	62.458	78.917	374.5	85.875	175.417	2.708	149.208	266.708	384.708	483.375	126.667	58.042	43.542	40.583	25.333	15.292	1611.33	52.667	47.917	862.458	53.417	1598.83	145.25	2675.92
92	7	wt7_48h_2	69.167	171.708	47	71.958	153.333	4.083	151.042	42.25	47.917	481.542	128.875	40.625	35.75	49.708	22.958	14.458	1098.67	76.292	27.917	86.958	81.25	1671.38	164.292	3318.62
93	7	wt7_48h_3	26.958	80.542	149.667	43.708	116.542	7.958	162.167	173.875	191.208	350.042	94.25	41.542	24.375	39.083	16.208	4.75	1226.67	58.083	40.208	493	103.667	1092.88	133.542	2133
94	7	△slr1305_48h_1	54.8693	82.3795	214.405	72.2921	125.739	2.49598	78.4022	338.65	510.95	447.062	87.9074	48.678	40.9213	46.1806	27.0867	9.64473	1915.89	53.5238	34.0343	665.849	65.0096	1619.92	131.049	2330.48
95	7	△slr1305_48h_2	40.0731	78.0964	162.775	55.8746	114.948	4.0816	76.1476	226.371	537.585	418.849	98.6801	49.9816	43.9759	34.1001	17.419	6.12127	1903.87	76.4322	37.945	723.998	57.8336	1619.82	137.703	2261.06
96	7	△slr1305_48h_3	61.89	98.1334	158.265	47.1777	120.966	5.80892	66.5236	318.092	595.75	390.028	113.142	41.3577	32.4208	31.8342	20.4292	8.28913	2235.78	54.0428	42.4878	684.892	53.7562	1685.05	142.614	2135.09
97	7	△sll1879_48h_1	46.2059	70.1463	160.565	37.7157	65.3975	0.959867	124.814	179.226	98.1296	563.37	54.6567	385.015	56.2092	34.9884	9.60058	4.9806	688.081	42.0215	26.9631	173.28	33.4256	1189.53	125.469	1384.83
98	7	△sll1879_48h_2	80.9172	85.2559	325.105	41.4695	70.1334	1.30046	121.453	231.909	274.443	568.539	67.9248	519.741	52.7475	25.6099	13.2959	6.16021	873.128	67.9478	29.5321	167.486	25.4931	1295.71	130.081	1988.71
99	7	△sll1879_48h_3	38.0193	61.0798	68.0223	46.654	67.5039	1.70299	137.834	151.873	103.339	500.625	93.7748	402.714	51.1137	29.6614	12.3057	7.8641	777.815	47.858	25.1573	145.322	43.526	1231.07	124.411	1439.67
100	7	△slr2100_48h_1	54.3518	129.494	299.178	64.6002	127.677	2.96308	80.1429	304.371	202.385	458.071	83.8101	44.9568	18.1779	63.2599	28.2392	10.1993	900.75	44.5002	32.612	658.378	73.5649	1127.24	136.433	1848.88
101	7	△slr2100_48h_2	49.5808	109.733	188.221	56.1927	121.331	4.50972	97.1111	299.997	165.35	454.942	78.2094	44.7369	24.3128	41.3511	18.3924	11.8209	813.429	67.3727	39.4589	546.545	77.5461	1392.44	145.747	1915.2
102	7	△slr2100_48h_3	48.4308	118.127	241.871	73.0162	135.499	3.18059	83.7189	346.225	159.168	473.344	61.053	41.7248	22.23	47.7351	17.0649	8.27262	770.802	51.7548	54.471	595.116	72.1698	1248.5	123.942	1808.46
103	7	△sll1624_48h_1	125.963	88.7785	377.078	60.5456	169.927	7.84672	174.727	492.697	722.79	479.252	139.442	46.3857	35.9379	62.4109	24.4807	12.166	6737.22	68.4616	44.1214	531.154	75.778	1007.05	159.598	2557.67
104	7	△sll1624_48h_2	83.803	97.1517	251.421	69.4338	188.471	6.65707	158.556	489.308	503.181	522.602	153.004	45.9647	46.0084	66.8552	25.9826	11.2708	7189.88	47.6248	48.1851	568.324	85.0724	1066.26	130.218	2505.29
105	7	△sll1624_48h_3	60.4689	88.3906	330.448	66.7756	153.06	3.75989	118.521	369.548	581.875	481.68	176.881	45.0173	42.5852	69.1614	20.7005	12.8854	5696.04	52.7032	43.0606	579.695	53.7942	1564.61	246.503	2013.76
106	8	wt8_48h_1	21	13.542	206.792	26.917	230.25	29.167	285.833	14.667	155.458	47.917	124.375	572.375	88.75	41.083	46.583	42.5	645.208	110.208	188.292	250.792	286.292	3492.21	151.25	2867.25
107	8	wt8_48h_2	24.083	12.5	131.375	7.667	273.042	24.917	344.625	17.083	108.042	38.667	134.292	662	66.625	26.75	37.667	32.792	696.208	93.125	193.958	408.917	277.5	3592.88	191.042	2977.67
108	8	wt8_48h_3	29.167	25.542	246.167	23.75	304.042	8.042	365.875	21.56	112.583	37.31	130.833	452.208	142.5	51.042	46.5	21.875	954.25	84.375	177.375	537.917	295.083	3391.54	200.917	3256.29
109	8	△slr0687_48h_1	23.5613	17.131	189.457	14.5927	256.182	22.7795	303.304	15.7268	160.046	45.4322	107.929	570.713	88.6692	39.5384	49.2457	19.7588	1094.33	83.8555	152.549	446.583	202.879	2501.19	151.202	2085.33
110	8	△slr0687_48h_2	27.0389	22.4371	106.4	15.4455	188.175	15.2637	257.855	14.8245	106.217	42.4855	120.774	626.916	69.5088	32.0763	34.2599	23.7106	693.702	88.9652	170.451	325.939	290.895	2398.91	123.906	2385.52
111	8	△slr0687_48h_3	25.3535	16.4181	206.939	15.7954	270.585	15.8766	251.886	17.1179	152.956	39.011	142.704	520.792	90.7036	32.6465	30.4287	23.1676	928.835	58.7358	146.861	437.326	445.448	2559.64	147.161	2292.68
112	8	△slr1588_48h_1	26.1766	14.3791	251.033	21.8177	263.612	15.2901	337.736	59.9827	184.422	39.6217	156.313	1161.09	102.405	46.0442	32.3245	29.5474	662.187	101.985	283.955	357.386	284.861	3473.63	177.588	2687.36
113	8	△slr1588_48h_2	31.6743	17.3404	251.033	22.5606	332.064	8.58176	400.922	58.3928	197.625	33.3534	123.856	635.611	85.4642	56.5036	69.2092	43.2185	750.782	119.982	118.878	386.417	371.89	3166.99	170.828	3167.77
114	8	△slr1588_48h_3	21.6941	21.87	327.571	16.1469	384.005	6.70832	402.119	62.4881	203.078	45.293	108.996	408.415	101.161	50.4433	43.5137	33.621	734.798	115.108	156.394	404.102	189.751	3296.07	157.047	3119.11
115	8	△sll1673_48h_1	16.1495	15.2112	208.305	36.2402	248.916	16.1064	336.908	11.4413	87.5591	43.5404	102.722	336.73	121.935	30.8963	30.9931	36.7319	780.018	84.3589	132.752	309.015	440.884	3957.01	169.272	2993.74
116	8	△sll1673_48h_2	21.1044	12.1894	137.926	25.5552	228.444	14.7928	324.152	10.6041	59.29	57.8564	88.7107	360.694	73.3313	37.6728	49.153	26.7561	745.56	103.987	214.761	252.294	658.969	3291.45	177.131	2865.75
117	8	△sll1673_48h_3	19.0673	15.0717	139.612	25.0727	244.081	11.8343	298.591	6.99729	61.6535	45.5822	120.168	460.661	69.634	24.9623	27.6032	16.7803	675.342	81.4329	162.255	245.035	381.107	3141.95	177.721	2866.93
118	8	△slr2041_48h_1	27.9311	20.8827	190.104	15.0025	261.002	22.0236	420.715	10.4385	123.068	27.1363	171.389	774.016	100.904	31.126	19.452	7.97896	695.674	122.858	220.071	268.44	179.929	4072.5	190.483	2778.49
119	8	△slr2041_48h_2	31.7299	13.1935	243.697	11.5654	282.608	13.4792	369.834	13.2953	125.371	42.92	121.281	906.716	76.1758	38.1322	35.5936	17.1324	923.231	86.7187	159.005	502.726	184.642	3879.04	175.358	2957.9
120	8	△slr2041_48h_3	18.5719	15.7597	194.217	20.7552	321.135	11.3412	357.27	11.8416	76.3713	27.6874	109.311	641.303	129.322	26.6852	43.5026	13.6118	797.691	54.069	157.83	410.779	248.984	4305.62	185.52	2982.41
121	9	wt9_48h_1	18.75	19.708	3.792	57.625	2.833	4.625	1.708	29.875	19.125	171.083	66.417	6.333	89.75	22.083	47.458	12.458	424.542	6.167	28.375	281.25	6.333	568.75	49.25	774.708
122	9	wt9_48h_2	14.458	20.167	2.958	43.25	4.25	4.25	2.792	13.75	27.317	317.542	89.417	12.375	50.875	2.208	12.833	2.546	464.167	8.5	14.458	407.333	20.583	380.875	22.75	1228.83
123	9	wt9_48h_3	10.5	38.167	2.792	41.708	4.667	5.875	4.875	35.542	31.333	372.833	95.25	16.458	26.583	19.167	4.958	3.5	463.125	11.25	9.958	374.542	20.86	333.417	17.64	487.458
124	9	△slr1983_48h_1	15.3155	33.1397	1.07503	96.7368	2.82555	4.55182	3.05769	24.9701	13.7524	261.515	69.7543	16.161	56.7524	12.7649	27.9783	8.495	412.518	7.97442	21.4923	291.513	8.80108	399.495	32.0969	874.348
125	9	△slr1983_48h_2	12.2633	19.7312	1.27004	67.9094	3.9797	5.92332	3.23569	16.62	14.2781	290.786	86.9447	3.94082	65.0823	17.502	21.009	8.15247	355.738	9.66196	17.3486	316.277	13.6472	404.646	33.8014	912.181
126	9	△slr1983_48h_3	21.9898	34.786	5.56656	37.1701	3.88032	1.76541	3.67128	42.4817	39.6199	291.051	44.3184	6.80916	50.3176	39.3149	39.4589	6.84559	412.071	10.9275	20.2764	540.356	18.0282	422.207	26.2983	783.471
127	9	△slr1760_48h_1	8.91986	23.2498	6.14772	43.6344	6.042	11.3786	2.1459	29.937	13.1247	217.114	51.4747	15.4157	30.614	16.8071	28.2944	3.05479	394.088	9.7333	11.6177	250.404	5.38247	441.805	25.4442	807.083
128	9	△slr1760_48h_2	9.96416	26.9534	4.71398	27.0157	7.875	9.48214	5.08433	18.8268	13.8014	210.311	49.1674	8.71873	45.1514	13.5823	12.4005	4.59945	403.294	7.01029	9.09849	224.66	6.06957	421.063	28.2573	723.658
129	9	△slr1760_48h_3	29.0878	28.7232	5.31771	27.9782	2.792	9.41134	2.51866	76.8048	48.987	254.79	79.5011	12.8101	59.6888	13.383	29.0325	9.51577	407.016	10.6218	17.0151	329.773	4.07698	586.744	23.3126	657.03
130	9	△sll5059_48h_1	9.44201	49.7509	5.54399	27.2082	5.875	8.07794	1.63209	30.5357	30.671	286.621	73.844	15.0259	93.8944	14.239	21.9465	6.58401	613.727	10.7182	19.4825	371.589	18.9871	281.429	59.9521	918.754
131	9	△sll5059_48h_2	10.3124	6.13158	3.16799	49.6021	4.833	3.08991	4.19776	30.2699	20.9062	254.643	158.37	16.5362	44.9804	14.9238	15.255	10.1478	597.913	9.48209	17.2199	237.837	23.1784	335.809	61.8915	994.777
132	9	△sll5059_48h_3	13.0537	41.5004	3.31915	23.9987	4	4.21429	2.23881	57.5126	40.9607	330.829	198.715	10.0578	96.1752	12.0414	17.5674	3.01939	596.845	13.5956	27.1413	242.369	18.2082	483.511	52.7892	866.695
133	9	△slr1213_48h_1	8.52166	13.9518	2.95415	58.0485	2.41644	3.43912	3.66146	22.1261	25.7633	304.058	64.2695	13.6153	34.8259	19.4419	11.0634	6.57289	459.357	9.72729	15.3861	350.499	17.5657	432.992	26.1039	844.579
134	9	△slr1213_48h_2	19.6737	26.669	3.58241	43.8174	2.50835	2.67487	3.16528	36.3817	23.2756	348.861	58.0611	6.53377	33.8457	20.9781	22.7498	3.70834	527.551	8.54515	16.3178	270.817	11.0047	445.277	23.5979	795.302
135	9	△slr1213_48h_3	20.176	24.1271	3.10344	49.2362	2.56482	1.40163	2.5623	16.3664	13.7989	330.452	70.7437	15.6455	40.9788	22.4439	28.2294	5.05924	429.724	9.05178	21.645	291.33	27.0098	372.71	17.7022	807.934
136	10	wt10_48h_1	32.583	21.125	326.542	63.333	813.333	44.208	667.542	169.75	147.583	97.208	1127	192.708	100.5	113.125	134.667	48.167	1322.12	205.625	327.5	1381.96	970.625	15764.5	444.375	7032.42
137	10	wt10_48h_2	35.208	18.208	266.958	69.625	872.708	47.125	734.958	168.458	189.417	96.083	1264.25	152.583	119.792	119.875	117.375	46.25	1226.21	150.208	326.375	1135.5	765.792	21363.1	566.458	8474.08
138	10	wt10_48h_3	32.083	20.167	239.958	59.833	914.833	41.625	664.875	155.917	194.292	83.625	1214.71	207.292	109.25	95.083	131.667	50.208	1188	184.625	377.042	1110.25	892.75	21659	717.625	7671.96
139	10	△slr0947_48h_1	29.6654	25.2061	287.433	100.286	717.052	48.4753	897.005	185.257	284.409	64.1547	1804.16	129.809	126.128	109.213	247.722	85.5914	1379.11	158.332	403.925	870.822	659.595	19931.1	573.212	6914.21
140	10	△slr0947_48h_2	32.1022	24.3199	272.41	98.9173	711.958	65.9207	793.099	197.379	118.855	48.2181	1822.86	121.218	110.301	106.169	222.793	70.9396	1233.15	139.9	377.07	861.794	477.48	20043.3	611.624	7073.68
141	10	△slr0947_48h_3	37.1521	23.263	311.074	90.4532	750.552	14.375	910.673	240.528	125.783	61.4316	849.077	167.919	151.6	119.233	179.277	94.5041	1143.65	212.06	361.798	864.566	651.647	17532.5	632.32	7110.7
142	10	△sll0396_48h_1	42.5605	21.1117	299.544	78.791	655.45	43.3325	557.011	116.758	135.386	120.521	1498.08	142.983	128.41	114.774	106.325	53.1308	1601.7	209.956	291.918	1023.98	768.348	18694.9	679.646	5813.64
143	10	△sll0396_48h_2	54.4034	20.7859	263.524	72.1486	952.934	41.6965	657.298	159.704	178.837	114.893	966.384	206.59	132.983	139.341	135.485	54.8523	1466.66	195.207	592.061	1118.42	885.713	21056.4	403.209	5597.2
144	10	△sll0396_48h_3	56.1114	19.6821	264.087	67.1907	868.757	39.5504	607.477	132.299	211.787	145.371	805.762	175.582	99.7358	157.135	157.196	55.0188	1227.6	215.782	540.732	1083.09	823.95	20540.2	692.449	4959.76
145	10	△sll0797_48h_1	30.113	15.2	74.3994	47.0833	712.657	62.4418	460.689	110.564	73.8234	84.1738	1231.62	167.962	53.8174	45.9535	74.2442	46.5792	996.341	274.781	355.197	1435.76	379.235	19123.8	629.694	8449.88
146	10	△sll0797_48h_2	30.2142	13.9653	70.1974	47.8115	455.137	36.1779	422.765	77.4893	60.6182	99.649	943.059	112.969	104.932	48.9877	55.2253	43.1375	806.198	77.3887	326.889	967.594	409.26	17967.8	414.655	6790.7
147	10	△sll0797_48h_3	29.1084	14.486	74.092	54.7717	498.942	44.7625	420.831	71.3986	52.1291	89.3341	1138.85	177.503	75.8391	46.4388	71.3225	37.9744	795.223	213.234	370.676	1205.93	372.731	21307.3	637.94	8352.74
148	10	△sll1330_48h_1	32.1197	29.036	75.3217	51.1317	641.064	46.602	839.433	70.1386	47.6016	67.7645	920.973	169.95	129.866	92.1254	116.007	44.6365	403.016	184.46	375.966	445.99	573.131	20284.4	650.645	9286.48
149	10	△sll1330_48h_2	32.8232	27.4115	75.0659	58.0012	653.078	31.476	827.188	111.718	52.4754	101.292	1010.38	156.301	148.566	90.6689	93.9505	46.0795	465.691	227.8	301.616	592.165	619.637	18512.5	649.288	8303.92
150	10	△sll1330_48h_3	28.8073	31.8936	74.3478	55.8635	571.843	44.8655	756.942	89.1442	52.7267	115.828	1080	158.686	149.813	89.989	118.814	43.7478	529.035	264.039	300.929	590.108	705.705	18215.9	583.039	8304.04
151	11	wt11_48h_1	13.583	14.083	460.208	96.333	512.5	19.333	532.875	76.083	248.917	27.625	181.75	115.833	18.875	144.792	145.708	56.25	942.875	30.667	145.417	884.417	953.25	4041.29	95.458	2029.25
152	11	wt11_48h_2	32.083	12.5	503.667	109.667	470.583	20.875	584.083	187.458	314.917	43.542	271.958	107.083	24.583	192.75	97.167	43.917	1436.08	49.042	106.75	1291.54	505.75	2861.71	124.5	2368.79
153	11	wt11_48h_3	20.792	11.583	673.875	90.583	542.917	14	620.667	272.542	440.25	26.042	196.583	124.583	22.625	225.583	136.208	38.375	1515.46	63.958	136.333	1204.42	781.167	3641	105.542	2616.79
154	11	△sll1708_48h_1	17.9378	7.83083	189.606	84.4022	378.699	15.321	683.45	152.992	269.931	21.3646	234.4	105.05	22.5312	147.538	93.134	39.1619	1639.28	55.8131	68.7368	393.888	613.053	3291.74	185.035	2397.8
155	11	△sll1708_48h_2	23.7732	6.34996	824.662	98.1527	305.313	15.8882	579.301	168.811	225.007	27.3296	197.84	113.616	20.2232	146.964	105.177	35.5026	1513.97	51.8115	74.5677	413.321	620.559	3226.32	219.954	2385.22
156	11	△sll1708_48h_3	20.6402	7.29233	296.965	106.537	338.17	22.5309	646.659	188.391	399.792	24.4796	226.053	121.486	16.6987	169.288	115.117	37.4285	2041.59	54.1992	123.195	510.396	422.861	3644.87	250.954	2800.94
157	11	△slr0312_48h_1	11.3068	12.6423	1051.06	87.4225	589.438	19.0057	663.443	279.243	378.536	31.6209	230.342	65.5967	22.7176	236.886	200.653	46.4016	2197.63	41.7198	151.587	1911.67	1744.52	3196.29	129.501	2099.45
158	11	△slr0312_48h_2	18.1034	14.7629	688.023	96.6867	386.02	20.2778	497.107	272.686	291.602	29.8378	233.545	38.8721	27.6823	246.828	146.093	54.5763	1645.25	35.2938	93.9757	1676.7	1398.16	3219.28	185.293	2170.77
159	11	△slr0312_48h_3	23.1532	13.1861	808.526	98.3543	590.213	34.3317	594.095	320.121	387.84	31.828	190.785	79.6062	21.2878	233.94	161.352	48.1702	2315.76	46.6383	149.152	1969.78	1335.65	3371.6	132.621	2096.1
160	11	△sll0485_48h_1	21.2	12.8652	533.742	83.1978	520.596	17.8686	644.805	211.592	365.867	27.4454	179.016	62.7447	17.4514	173.061	131.36	41.2065	1395.3	55.3047	146.969	1258.63	619.685	2795.43	117.719	1830.49
161	11	△sll0485_48h_2	19.8977	13.7787	384.639	87.9784	451.171	13.6524	541.698	193.777	283.422	29.7804	187.32	61.2235	20.7994	260.82	104.639	70.7081	1079.43	39.2908	124.124	1081.15	583.926	2664.93	94.9062	2115.79
162	11	△sll0485_48h_3	15.8326	16.0516	517.617	89.9796	524.288	16.2624	529.812	173.558	290.158	31.7819	163.26	50.4521	22.4161	170.976	102.151	53.9134	1078.97	47.4994	85.5768	1051.68	881.765	2580.49	113.252	1824.03
163	11	△sll0039_48h_1	15.1473	10.8199	241.332	70.1594	420.063	16.4365	582.157	156.059	345.255	27.7155	252.31	96.7158	16.3812	206.968	121.955	31.7278	1197.65	43.8442	107.376	867.81	533.204	3811.39	117.252	2283.19
164	11	△sll0039_48h_2	28.2575	10.5043	385.129	101.278	545.246	8.93782	681.417	179.002	459.583	28.174	242.551	95.6329	20.019	173.514	111.082	40.8648	1393.18	39.2809	119.159	1311.47	497.493	3190.46	142.377	1971.26
165	11	△sll0039_48h_3	17.251	13.4262	281.599	65.9081	475.124	17.7496	624.651	158.686	386.862	27.8519	190.099	104.383	16.4609	281.082	131.631	37.8431	1289.5	50.1278	101.185	1026.97	559.235	3392.79	132.386	2015.81
166	1	wt1_48h_1	106.167	36.75	171.125	42.042	1492.79	60.292	817.5	225.583	312.5	114.458	852.042	167.458	46.75	1106.88	797.292	475.583	973.833	1736	125.458	446.625	1929.12	15190.8	365.917	5755.17
167	1	wt1_48h_2	121.875	33.917	654.042	69.083	1651	26.792	809.667	287.625	398.625	122.083	1072.58	200.458	62.083	670.25	342.208	131.625	848.5	943.583	98.292	732.25	1638.12	13606	396.042	5797.71
168	1	wt1_48h_3	129.292	33.5	375.708	71.625	1984.75	202.042	1335.38	535.083	642.833	123.417	575.208	168.958	43.875	751.958	342	127.708	1122.88	1689.5	117.792	722.333	900.25	16475.2	435.417	5822.29
169	1	MT-△sll0649_48h_1	76.583	43.042	948.905	63.1328	1281.04	51.6726	1376.73	388.167	612.458	130.916	1022.3	209.083	33.875	498.61	280.249	343.379	1222.33	1137.18	87.542	630.054	12677.9	13250.2	381.015	5092.8
170	1	MT-△sll0649_48h_2	105.792	52.542	528.143	38.0823	1354.07	54.034	1442.21	401.292	464.667	121.219	883.972	166.875	57.333	475.397	322.944	330.494	1006.55	1149.63	123.583	500.477	11787.1	11818.6	451.973	5819.11
171	1	MT-△sll0649_48h_3	127.583	58.5	689.701	40.899	1442.34	44.9908	1423.4	442.458	490.292	112.219	924.597	211.292	57.583	498.957	247.887	420.828	886.115	1351.47	97	745.983	14001.2	14266.6	406.768	5153.81
172	1	MT-△slr1584_48h_1	107.926	48.913	453.004	41.8605	1983.93	55.9887	978.806	592.318	707.822	190.198	1261.96	173.926	47.4043	713.047	397.321	198.757	701.17	1223.46	55.016	524.94	1437.55	13334.1	391.232	5108.67
173	1	MT-△slr1584_48h_2	141.088	40.3926	743.121	39.9084	1563.19	61.8589	854.282	264.842	487.63	132.586	1209.49	167.018	42.0003	644.959	388.909	124.641	765.409	1158.57	47.1395	530.416	1482.13	16016.4	406.047	5399.23
174	1	MT-△slr1584_48h_3	116.246	29.5516	647.718	48.3622	1659.07	57.2824	1122.25	264.756	523.074	120.021	1227.37	167.549	39.2983	709.742	394.156	196.823	844.675	1218.19	73.8117	482.688	1502.73	13933.5	442.936	4995.89
175	1	MT-△sll0789_48h_1	67.525	52.1236	1773.44	55.2462	2136.94	28.6725	719.426	362.273	409.619	205.925	851.498	175.626	46.0025	157.84	97.6132	76.9657	1551.96	1109.61	21.4372	2067.02	1068.94	13765.2	375.835	5135.56
176	1	MT-△sll0789_48h_2	80.9363	39.6433	1412.96	59.4041	2202.85	47.0599	684.544	312.917	500.403	169.331	1208.79	171.744	52.8029	147.738	126.579	56.2107	1414.67	1497.02	15.7713	1721.68	638.271	15403.5	391.938	5198.15
177	1	MT-△sll0789_48h_3	66.6503	46.74	2055.88	57.8929	2372.49	71.3651	696.738	255.712	335.754	213.275	1501.15	140.497	51.9119	184.636	145.573	84.7158	1113.75	1262.66	14.5097	1030.73	1480.08	14832.7	358.944	4994.6
178	1	MT-△slr0081_48h_1	106.302	29.1207	379.232	119.835	1637.21	143.858	1955.35	401.614	381.418	125.384	677.893	172.847	56.4265	1965.35	2748.97	428.299	789.272	1971.47	197.814	337.449	1937.75	15019.7	397.592	5083.45
179	1	MT-△slr0081_48h_2	66.4754	44.9448	296.783	109.899	1637.21	164.359	1795.05	348.738	476.62	114.888	662.73	169.738	52.2982	2337.43	3016.23	411.643	769.542	1859.55	163.844	308.583	1571.69	14906.9	335.149	5599.82
180	1	MT-△slr0081_48h_3	84.9598	42.1727	330.576	105.416	1325.26	219.874	1927.85	331.955	336.977	107.239	754.707	175.817	55.8321	2184.92	2550.73	432.665	580.408	1596.98	170.7	231.569	1623.33	15314.3	356.445	5535.92
181	2	wt2_48h_1	86.792	18.792	181.708	22.542	564.958	53.458	580.083	330.5	253.75	31.333	390.75	853.167	74.417	236.292	135.917	146.458	680.625	95.333	484.375	186.708	775.875	4258.12	294.167	3200.33
182	2	wt2_48h_2	86.458	19.125	139.75	49.75	614	70.542	541.833	333.5	303.792	24.5	375.208	825.958	65.292	270.375	196.083	156.375	585	149.125	530.25	118.458	751.167	4987.88	264.458	3004
183	2	wt2_48h_3	82.083	15.292	167.5	28.708	571.208	47	548.417	304.167	272.667	24.167	381.208	896.708	74.542	244.417	156.208	140.917	687.375	156.167	380.958	206.833	593.25	4700.17	200.417	2701.38
184	2	MT-△slr0115_48h_1	80.8044	8.29056	168.232	38.5348	664.831	79.0726	565.613	432.38	313.331	26.6684	253.443	985.025	95.8343	227.973	157.693	190.167	775.701	101.289	630.066	455.653	790.087	3722.85	267.481	2293.76
185	2	MT-△slr0115_48h_2	74.969	7.02562	189.681	41.0667	594.193	114.61	595.468	525.594	281.017	12.2234	244.073	717.781	111.733	233.788	158.112	209.958	627.045	120.249	573.222	427.453	780.29	3494.56	259.519	2245.5
186	2	MT-△slr0115_48h_3	77.4277	7.56377	313.981	43.9317	662.355	55.9777	725.775	597.647	314.118	18.2238	248.435	452.423	130.987	233.873	152.815	242.914	824.984	143.548	605.039	287.5	423.905	4433.06	244.094	2429.46
187	2	MT-△slr1837_48h_1	100.299	20.1545	257.7	23.7414	659.041	31.0905	525.2	263.457	304.976	26.5684	488.426	325.249	79.2843	164.543	73.8062	95.2033	604.779	96.0924	312.811	53.6476	2941.8	5973.77	278.484	3438.47
188	2	MT-△slr1837_48h_2	35.5687	14.923	178.787	27.9469	421.343	33.4534	495.762	152.884	177.706	22.708	375.328	194.649	56.3467	238.752	75.7695	132.05	562.527	72.7158	233.962	41.3261	5894.72	4316.71	271.733	2554.25
189	2	MT-△slr1837_48h_3	60.8497	16.6741	227.385	28.3466	595.41	58.8167	662.095	294.145	350.345	22.6527	451.914	295.653	107.125	226.703	113.217	142.373	610.543	122.686	315.397	122.115	1707.65	5414.76	217.431	2693.78
190	2	MT-△slr6040_48h_1	100.109	17.2125	256.751	26.308	629.05	107.596	431.447	389.831	290.677	31.9663	690.903	333.199	73.1525	394.723	337.272	521.695	573.371	157.577	299.29	75.448	854.448	4952.73	265.109	2354.77
191	2	MT-△slr6040_48h_2	95.6278	25.1781	98.0685	50.2532	897.936	40.9939	438.462	350.221	229.04	25.7814	566.555	214.092	64.8495	283.168	300.178	295.593	543.661	156.659	819.722	76.1677	1893.54	3876.95	298.426	2385.11
192	2	MT-△slr6040_48h_3	61.6364	8.45471	152.901	54.7721	892.172	31.3871	434.955	249.793	205.009	27.1725	583.047	197.479	69.001	236.199	161.882	343.476	329.363	112.597	389.636	73.8287	666.499	4008.5	327.293	2256.17
193	2	MT-△sll1592_48h_1	49.9885	22.7732	198.713	15.4427	364.28	32.7076	697.147	138.112	126.927	29.4758	405.652	847.019	43.1426	70.5254	478.333	116.741	609.559	90.4777	383.074	131.52	3881.06	4944.46	309.178	2982.06
194	2	MT-△sll1592_48h_2	44.2428	25.1147	169.257	20.5696	398.261	35.7739	711.486	146.116	149.435	40.3682	456.074	918.186	46.709	84.3277	505.738	124.521	518.886	101.756	359.918	131.51	3425.22	4775.16	250.672	2878.18
195	2	MT-△sll1592_48h_3	53.8892	31.2015	184.325	20.196	406.869	30.5955	725.448	170.899	151.888	34.3909	423.322	929.782	47.5859	75.1997	378.269	120.822	553.189	102.054	367.751	148.943	4214.05	5050.99	279.167	2838.66
196	3	wt3_48h_1	57.208	117.208	51.5	249.167	217.583	14.708	275.208	1212.12	142.042	755.75	129.042	2733.88	13.5	317.458	168.75	59.542	616.583	84.5	211.792	97.958	437	2420.58	186.958	1502.29
197	3	wt3_48h_2	47.958	91.25	69.083	298.458	216.792	22.167	330.792	1033.46	139.375	790.917	152.75	2173.67	17.583	182.667	161.125	49	523.667	78.792	115.125	114.96	616.458	2626.42	176.833	1270.33
198	3	wt3_48h_3	63.792	83.792	91.542	306.042	203.375	14	281.75	1079.04	168.042	735.25	180.75	2606.67	15.542	244.125	152.792	48.667	472.542	73	97.583	111.5	454.958	2428.96	155.833	1383.38
199	3	MT-△slr1783_48h_1	48.6998	70.6009	74.9096	164.806	246.969	12.3897	289.172	1067.97	150.755	605.846	174.276	2275.02	15.8709	314.482	188.849	65.2851	446.45	69.3639	148.146	108.032	543.311	2123.78	151.424	1221.42
200	3	MT-△slr1783_48h_2	67.2139	101.493	90.7145	268.868	193.509	12.5896	223.557	1076.44	162.782	477.601	191.853	2390.91	15.8484	224.372	125.294	56.965	374.544	51.5974	139.448	122.197	504.938	2439.02	177.012	1167.03
201	3	MT-△slr1783_48h_3	58.1902	89.5005	78.237	188.973	251.358	15.8829	275.095	1290.81	152.776	427.365	167.225	3022.41	14.698	260.952	186.325	67.1287	452.542	71.3993	143.463	132.072	441.035	2312.61	173.346	1115.29
202	3	MT-△slr1909_48h_1	52.8577	77.6683	62.6326	203.567	203.066	36.1196	233.104	1392.93	177.342	862.329	54.6235	2737.96	14.2097	1865.37	459.627	124.123	566.698	106.248	314.66	229.375	236.05	1955.75	175.915	1189.99
203	3	MT-△slr1909_48h_2	64.2682	113.882	70.03	192.714	227.068	32.2044	228.767	1262.51	121.374	655.092	61.1949	2033.33	15.9383	1037.23	444.701	128.065	569.214	92.1618	269.727	246.217	269.589	2113.95	188.464	1145.02
204	3	MT-△slr1909_48h_3	68.2767	94.1873	73.3276	198.186	233.291	32.3266	218.026	1489.58	144.088	733.1	57.2464	2712.55	13.8674	1670.81	439.22	95.0498	594.406	88.8805	244.436	223.538	303.795	2117.78	173.281	1281.42
205	3	MT-△sll1544_48h_1	49.0411	126.913	70.6082	255.558	238.865	13.5835	275.407	1149.66	157.008	747.901	198.213	3103.35	9.7005	200.435	107.277	38.4094	476.823	81.8979	132.701	58.6855	501.341	2436.92	112.326	1613.47
206	3	MT-△sll1544_48h_2	43.7122	149.454	46.5014	272.134	222.458	18.2245	269.277	892.708	127.032	766.113	155.496	2717.92	11.578	203.892	142.254	42.7408	517.434	84.1375	128.578	63.2998	553.147	2435.78	131.254	1497.1
207	3	MT-△sll1544_48h_3	36.2811	108.459	28.4324	263.381	171.381	20.6504	259.343	947.263	93.6605	644.178	151.442	2533.26	11.3869	192.638	113.895	44.4066	480.136	84.4965	111.695	47.4628	693.676	2686.82	93.83	1588.28
208	3	MT-△sll0921_48h_1	53.863	165.59	111.826	306.33	210.938	13.8472	336.434	1657.34	166.685	748.022	88.7058	2425.01	15.9085	208.215	178.355	51.2384	546.501	53.6597	132.774	110.597	371.421	2264.17	188.392	1140.14
209	3	MT-△sll0921_48h_2	46.4084	214.823	64.4739	333.511	181.421	21.5513	292.576	1409.13	121.656	814.582	88.771	1193.24	17.6248	276.193	194.962	72.5188	703.823	62.8015	194.476	289.035	550.074	1932.05	189.998	1169.06
210	3	MT-△sll0921_48h_3	59.9409	173.574	95.651	272.589	265.732	14.8178	434.667	1569.88	181.635	594.287	159.847	2214.05	18.4088	286.353	248.459	68.7418	679.248	106.78	182.599	119.138	294.88	2859.85	146.501	1043.63
211	4	wt4_48h_1	97.792	34.292	227.5	70.708	808.917	165.833	783.125	502.958	748.25	14.458	393.5	121.708	35.125	4768.04	1867.58	173.917	648.458	138.458	1221.96	186.917	257.167	5907.62	110.375	5868.46
212	4	wt4_48h_2	110.792	27.458	163.292	65.792	867.125	187.708	797.667	394.333	724.333	20.167	583.333	91.75	52.875	4216.5	1610.29	203.625	763	151.75	1444	134.417	1244.54	4687.5	120.625	4708.17
213	4	wt4_48h_3	149.417	13.125	397.583	70.5	1028.75	178.5	871.208	882.583	1243.58	19.917	637.042	96.875	42.667	5047.67	2030.92	226.333	699.042	174.833	1795.04	179.333	877.333	4834.54	92.46	4375.58
214	4	MT-△slr0474_48h_1	160.704	29.7699	272.546	63.7629	438.959	138.566	532.172	599.03	669.129	13.0743	512.321	113.666	43.3212	4149.69	3266.46	204.065	1059.55	152.855	1623.08	176.069	401.355	7112.96	87.8304	4868.74
215	4	MT-△slr0474_48h_2	123.445	27.3205	173.128	71.3405	437.368	230.072	392.891	613.062	695.386	14.5473	592.718	107.365	50.0949	4918.41	2234.43	215.589	995.875	140.8	1135.45	121.507	518.952	6202.68	86.1541	5121.23
216	4	MT-△slr0474_48h_3	91.0216	30.0797	226.866	63.2983	521.839	224.843	834.288	688.64	789.434	14.9994	458.822	112.545	41.6873	4642.09	3763.57	231.272	689.14	168.353	1981.72	131.826	678.309	5883.51	144.155	5112.4
217	4	MT-△sll1292_48h_1	109.61	19.072	562.75	68.2086	904.247	159.482	714.195	548.313	864.944	16.2323	580.36	48.85	71.1137	1235.48	550.261	82.2675	618.985	146.376	1119.5	221.731	987.103	5426.28	110.244	5241.9
218	4	MT-△sll1292_48h_2	103.941	25.1036	225.16	59.8934	470.767	125.054	625.658	565.031	915.057	18.3506	596.061	50.1464	44.8402	799.882	488.339	115.556	604.136	133.666	983.062	200.061	781.933	4840.97	103.702	5056.33
219	4	MT-△sll1292_48h_3	70.1006	28.0175	226.866	64.5309	559.479	235.301	673.929	590.151	960.017	17.1934	292.505	48.0849	54.7666	1398.93	721.1	99.553	668.913	130.548	1299.88	184.904	776.427	4717.81	110.098	5018.36
220	4	MT-△slr1037_48h_1	141.748	22.7544	283.011	50.2371	1160.55	171.231	953.621	909.432	1105.33	17.6131	398.342	91.6669	41.6614	7151.27	2122.09	197.427	648.676	153.82	1139.4	152.612	1661.12	3672.39	138.931	3890.94
221	4	MT-△slr1037_48h_2	150.142	30.0228	824.93	63.8986	1613.71	138.231	1561.88	802.401	1436.93	18.7017	605.739	88.8559	55.3401	5479.47	1545.85	232.195	882.199	150.414	635.982	348.672	974.062	4839.68	101.048	4077.19
222	4	MT-△slr1037_48h_3	100.659	22.7847	238.718	50.429	888.537	232.831	866.936	322.421	1101.69	18.4675	664.43	106.727	48.7189	6028.44	1615.99	207.796	765.403	186.518	719.812	143.922	933.163	8245.78	138.016	5588.73
223	4	MT-△slr1042_48h_1	217.703	20.9076	551.381	83.7392	1524.45	1092.63	889.414	2359.9	1446.82	16.2423	240.027	202.474	42.2204	18702.1	1862.51	345.351	1055.82	387.903	1977.76	460.049	861.657	4906.87	80.6122	5122.27
224	4	MT-△slr1042_48h_2	197.012	10.0863	450.266	34.3064	1293.34	672.043	824.805	1300.27	1571.2	16.2032	452.46	348.915	40.903	12633.5	2870.91	308.671	1013.29	341.498	2176.09	333.102	617.785	5249.44	100.307	5037.52
225	4	MT-△slr1042_48h_3	297.58	22.0401	593.537	59.6481	2172.57	1308.16	1417.58	2271.89	2593.9	16.8396	802.098	232.396	38.3691	23175	6973.37	291.696	899.017	416.505	1910.3	360.346	692.874	5774.62	85.4808	5076.43
226	5	wt5_48h_1	66.292	97.208	110.833	84.75	178.958	7.125	234.75	77.917	175.375	135.625	391.917	98.542	25.167	99.625	50.167	37.292	451.67	61.667	61.917	167.292	517.5	1544.83	118.417	1914.88
227	5	wt5_48h_2	56.208	90.583	69.458	118.167	213.917	39.167	235.708	126.208	201.167	125.042	212.917	115.083	25.083	115.5	42.458	46.708	369.167	80.208	261.25	98.125	509.625	1363.46	60.625	1760.92
228	5	wt5_48h_3	62.292	121.25	189.042	112.125	165.208	8.167	173.792	55.042	244.958	98.417	492.083	122.167	36.917	118.583	41.167	29.75	430.417	54.417	92.833	200.292	300.292	1227.42	50.125	1562.46
229	5	MT-△slr2024_48h_1	53.9524	107.142	104.862	94.4536	214.889	19.5716	192.421	77.1745	210.798	115.524	383.99	316.725	32.3238	95.9307	28.1176	18.8913	520.815	86.2283	143.078	165.879	509.412	1120.7	46.6082	1479.45
230	5	MT-△slr2024_48h_2	60.2072	58.1185	106.616	168.442	237.091	15.1997	219.88	90.7541	173.669	112.85	293.158	666.909	29.3822	211.89	68.2313	53.1818	376.805	119.295	100.435	139.613	338.534	1117.59	52.2974	1451.31
231	5	MT-△slr2024_48h_3	42.7193	104.93	117.367	63.2965	222.109	22.4087	191.238	86.9541	203.469	127.265	358.426	502.371	23.9046	166.987	59.5428	43.2214	418.291	149.098	201.9	197.191	443.945	1306.72	57.4712	1460.83
232	5	MT-△slr1982_48h_1	55.4312	92.5276	71.9055	158.291	288.76	22.9251	225.488	85.5757	192.476	118.433	248.11	107.942	23.3481	114.93	68.0269	47.3455	726.533	74.0447	207.327	176.803	247.224	1335.8	93.4739	1792.05
233	5	MT-△slr1982_48h_2	53.3432	89.1659	83.8811	57.1925	134.936	15.6997	168.548	103.874	231.878	112.712	241.211	113.503	33.6836	152.162	44.9704	43.7462	587.519	97.1105	190.984	231.027	225.859	1410.11	56.1161	1536.48
234	5	MT-△slr1982_48h_3	46.7917	71.5167	140.202	104.825	235.252	18.7633	305.237	105.208	224.423	120.334	299.452	129.851	26.2734	128.609	49.4101	57.9587	596.776	75.4893	121.633	212.206	217.247	1489.94	80.4401	1684.07
235	5	MT-△sll0038_48h_1	39.7237	126.638	119.835	112.553	151.748	8.50082	255.433	44.7166	154.971	119.574	302.674	131.049	26.9118	41.5917	43.7497	34.8724	432.91	57.9379	117.407	186.463	2003.94	1300.64	74.1381	1449.24
236	5	MT-△sll0038_48h_2	50.5519	112.278	114.727	114.708	225.733	10.088	353.182	51.2494	168.853	133.773	411.845	154.506	30.9303	43.336	37.6642	31.888	423.567	51.23	125.461	103.896	2039.87	1505.76	69.6287	1477.75
237	5	MT-△sll0038_48h_3	47.1461	110.18	123.378	102.254	149.11	7.90046	287.807	52.0059	170.235	128.936	349.522	122.824	27.9716	42.8109	37.0022	30.2718	401.346	50.0449	128.374	140.542	1951.55	1301.71	71.2514	1458.92
238	5	MT-△sll1291_48h_1	85.3619	139.656	140.086	85.3418	199.118	22.6132	218.741	85.6985	223.28	125.03	177.566	55.6947	35.9885	154.551	43.3778	70.2757	462.403	60.3998	195.641	225.686	367.024	1398.54	78.9968	1794.89
239	5	MT-△sll1291_48h_2	79.1663	120.476	158.368	90.8468	186.684	20.4723	175.741	92.5598	173.88	107.7	146.637	67.2456	47.2842	103.43	45.8843	41.6647	424.107	62.9958	142.104	249.742	382.007	1332.55	76.0921	1754.98
240	5	MT-△sll1291_48h_3	79.725	159.915	200.445	94.8602	120.251	29.8837	224.68	90.217	224.261	117.922	274.401	54.1845	42.4534	126.141	46.887	52.9406	362.1	58.2541	123.432	190.711	411.54	1515.25	75.8984	1742.45
241	6	wt6_48h_1	48.458	120.708	35.083	294.542	24.833	0.625	67.417	47.5	94.792	244.542	113.875	122.125	6.708	34	25.625	93.542	1642.08	76.958	10.125	79.875	54.125	76.667	81.75	1274.71
242	6	wt6_48h_2	35.375	97.708	22.875	208.917	26.375	7.792	73.208	105.167	112.667	293.417	87.125	790.5	7.375	205.708	100.625	106.25	1495.67	280.625	74.5	29.667	42.875	786.833	90.375	1332.17
243	6	wt6_48h_3	59.5	121.083	22.417	230.708	34.208	2.917	65.292	33.625	83.958	124.167	165.792	52.375	8.042	21.75	9.5	34.875	1359.21	49.583	27	81.833	34.542	630.5	65.917	1078.08
244	6	MT-△slr1214_48h_1	34.208	72.9982	27.4595	223.55	24.875	4.08903	46.4276	49.5722	180.708	229.505	204.136	322.029	5.94785	59.6255	38.7596	79.7985	1514.68	143.204	42.7912	94.686	47.4878	432.065	68.833	1050.5
245	6	MT-△slr1214_48h_2	45.792	107.823	23.523	257.618	45.667	7.14799	51.1819	51.9834	192.625	192.871	288.246	219.395	9.44788	33.4929	18.5283	71.4126	1490.4	104.401	36.0159	143.183	30.3808	406.033	66.208	1002.79
246	6	MT-△slr1214_48h_3	66.708	67.6875	33.9009	316.696	47.375	4.37882	56.1267	50.4962	200.667	213.613	322.445	291.843	7.64689	44.1105	23.4076	50.8715	1335.04	138.052	33.1431	139.116	42.8951	416.638	62.5	991.792
247	6	MT-△slr1594_48h_1	44.917	189.029	17.416	180.132	28.375	4.99084	57.3865	48.4871	157.917	257.958	107.509	311.476	6.08325	145.728	64.2613	50.6499	1238.78	145.144	44.905	37.267	53.2385	428.77	67.333	1031.21
248	6	MT-△slr1594_48h_2	57.167	136.984	35.0701	264.769	45.417	2.54352	71.9831	96.0897	190.333	240.401	133.61	314.977	6.6273	146.735	64.4226	52.7184	1369.47	145.478	41.2465	57.237	40.8691	431.017	62.667	1028.38
249	6	MT-△slr1594_48h_3	65.5	203.385	22.9029	141.332	30.208	2.89783	57.767	76.8997	135.417	182.663	123.872	269.19	6.49109	209.008	43.7538	81.5718	1778.55	149.693	46.7749	70.3473	46.1137	587.001	88.458	1499.5
250	6	MT-△slr1041_48h_1	35.7195	130.098	15.4744	244.267	24.3811	2.86637	61.9797	33.6888	57.5591	247.148	114.186	152.852	10.1143	40.194	38.0069	59.4076	1258.33	109.926	36.4622	53.6281	54.863	577.279	80.4492	1280.86
251	6	MT-△slr1041_48h_2	56.5258	75.5113	33.8029	230.882	31.1534	2.20895	89.6794	87.1589	60.8485	223.928	73.8989	241.666	5.87387	106.925	52.5899	63.9566	1223.63	112.748	37.4116	34.707	57.9722	513.192	89.041	1255.07
252	6	MT-△slr1041_48h_3	58.5603	82.866	30.2777	164.873	28.3213	3.30458	73.95	61.5044	77.3842	244.26	138.94	214.432	6.66405	47.1938	47.5409	58.7194	1291.39	93.3483	39.0169	30.1441	50.6879	523.597	63.3705	1213.66
253	6	MT-△slr1693_48h_1	36.1146	170.81	24.676	523.362	30.0587	3.58523	60.6914	57.5291	99.1256	236.787	85.5097	308.109	6.66405	130.745	76.2233	74.907	1286.71	130.82	30.8335	66.5596	43.906	419.124	78.889	1060.47
254	6	MT-△slr1693_48h_2	42.2496	134.041	22.4076	223.734	30.6748	3.16447	55.7582	78.11	115.466	210.025	102.757	327.792	7.45423	103.492	61.1238	81.8898	1295.22	150.007	44.4194	80.1611	51.4245	416.108	82.4321	1006.65
255	6	MT-△slr1693_48h_3	47.8693	98.9381	34.2502	226.928	34.8099	3.87449	72.1398	57.9468	120.625	241.179	161.694	366.373	7.40113	82.7317	51.9933	68.0828	1681.64	97.6412	42.4756	97.2662	43.6789	436.515	68.5784	969.679
256	7	wt7_48h_1	64.458	65.25	61.25	37.125	208.875	126.917	268.417	217.542	244.625	198.125	223.417	1285.04	26.917	1716.83	503.417	64.042	872.75	304.625	69.125	129.542	234.417	1606.21	102.833	2091.62
257	7	wt7_48h_2	58.833	143.292	70.5	49.542	252.417	158.083	252.542	212.25	257.958	335.542	181.25	1284.38	20.708	1789.25	470.333	62.5	1162.12	290.042	78.5	138.208	285.625	1636.46	101.125	2446.42
258	7	wt7_48h_3	43.333	78.042	65.708	84.458	291.708	140.875	211.25	180.417	302.208	403.375	183.708	1275.12	16.375	1644.46	496.875	118.292	1248.08	270.667	88.125	171	342.167	1711.21	131.208	2636.42
259	7	MT-△slr1305_48h_1	57.9958	118.073	72.3042	33.7608	249.308	116.247	184.808	190.783	373.902	306.748	276.273	1355.52	22.2471	2311.79	547.207	157.484	986.299	442.989	68.9099	73.5789	343.567	1768.23	110.049	2541.85
260	7	MT-△slr1305_48h_2	67.9825	87.0066	52.981	46.984	278.501	99.6171	170.577	180.232	374.496	321.186	242.304	1297.93	29.8785	2624.26	674.179	190.205	1142.22	435.363	58.7287	94.9469	353.463	1707.25	116.943	2474.04
261	7	MT-△slr1305_48h_3	51.0596	85.2871	57.7886	45.296	246.635	96.986	202.598	152.001	332.343	351.517	238.297	1480.23	16.4149	2357.35	596.216	182.559	1032.08	470.968	81.8238	93.3896	355.544	1781.89	110.171	2493.05
262	7	MT-△sll1879_48h_1	58.3513	232.045	134.803	27.6106	201.198	61.8465	353.009	118.912	230.148	330.701	338.083	1324.38	13.9897	218.013	114.071	36.7397	1226.77	187.749	18.7408	152.702	1339.61	1883.17	110.741	2829.17
263	7	MT-△sll1879_48h_2	31.2146	144.076	153.277	37.4715	204.278	39.3299	400.918	218.862	300.226	317.423	197.08	1352.12	13.1933	271.728	121.541	35.9983	1251.84	210.199	13.8358	202.02	1661.31	1300.41	88.8834	3143.19
264	7	MT-△sll1879_48h_3	49.0789	218.806	147.067	36.8137	215.04	94.5343	394.763	147.589	246.506	307.275	356.654	1345.65	12.8322	174.008	125.834	35.197	1261.65	201.39	14.0987	145.444	1321.53	1740.55	146.158	2923.09
265	7	MT-△slr2100_48h_1	60.2874	96.0841	43.1294	45.195	207.855	227.758	163.873	164.307	334.333	266.367	128.954	564.95	16.3579	2499.77	627.687	138.023	1073.27	282.289	67.4402	132.365	272.789	1517.24	106.549	2354.61
266	7	MT-△slr2100_48h_2	46.6703	125.024	49.8399	50.7076	169.875	171.606	211.583	189.319	268.585	320.383	194.305	531.382	15.7279	2501.56	509.749	116.869	1050.82	279.542	88.2847	132.14	294.513	1634.55	115.536	2427.66
267	7	MT-△slr2100_48h_3	43.0233	86.1531	52.1671	46.59	182.075	178.235	164.049	171.627	239.347	304.711	256.212	528.705	19.1595	2171.6	420.881	138.931	1022.64	224.306	71.6352	146.438	329.527	1608.17	109.06	2272.34
268	7	MT-△sll1624_48h_1	43.0951	56.8809	53.6637	53.1222	259.01	136.596	221.419	206.29	227.161	199.634	164.227	1322.58	11.5875	1619	458.651	69.1497	1612	320.294	64.894	302.212	269.483	2094.82	149.288	2272.8
269	7	MT-△sll1624_48h_2	50.5507	63.9703	113.52	57.715	285.071	147.973	220.659	221.004	247.133	279.178	241.732	1225.08	12.6302	1258.12	369.109	75.4192	1659.96	181.683	68.63	418.935	148.981	2755.57	245.647	2421.17
270	7	MT-△sll1624_48h_3	48.4605	51.3863	74.6516	51.7068	260.853	150.048	238.106	233.685	247.723	254.515	168.733	1437.29	11.6098	1176.06	345.367	72.8289	2040.42	148.69	47.6919	421.897	310.941	2025.59	138.521	2345.33
271	8	wt8_48h_1	73.625	64.875	136.792	65.458	234.25	18.167	235.292	198.958	257.667	488.458	284.375	215.167	35.167	77.042	40.792	24.458	928	77.208	45.5	93.458	548.458	1280.46	150.333	2027.33
272	8	wt8_48h_2	90.5	126.083	119	65.5	286.792	37.417	283.458	258.75	427.792	581.667	246.833	460.958	29.458	163.667	39.958	23.375	938.583	108.083	26.25	126.292	550.125	999.5	136.5	2516.33
273	8	wt8_48h_3	41.833	92.875	86.292	69.167	293.792	22.792	284.625	122	222.625	558.375	420.792	109.25	32.792	81.375	39	22.125	714.5	65.333	53.208	84.083	415.917	1468.88	149.5	2669.25
274	8	MT-△slr0687_48h_1	77.7391	93.6414	275.628	62.3055	229.412	13.9902	332.384	138.966	382.143	563.683	385.757	207.521	30.4543	50.2535	14.9931	26.7819	715.055	72.9038	25.5927	128.28	718.954	1011.19	124.372	2198.91
275	8	MT-△slr0687_48h_2	86.6086	89.8153	211.603	47.5364	266.157	15.1245	409.99	213.741	306.469	576.341	364.892	264.259	26.8222	68.3814	22.2278	26.4048	570.498	98.7817	19.8501	73.0486	969.724	999.442	151.187	2112.16
276	8	MT-△slr0687_48h_3	84.2871	115.569	175.133	50.3689	388.072	30.4098	322.735	384.672	447.102	503.211	201.75	254.137	24.2607	71.7272	22.7513	19.6685	756.162	69.9583	35.9931	104.689	1360.28	1101.95	146.66	2028.34
277	8	MT-△slr1588_48h_1	97.291	199.098	121.34	44.2135	351.773	39.9655	266.183	181.397	444.692	528.053	206.834	245.066	30.2289	100.653	37.2772	18.9103	791.156	65.1681	33.0974	82.8715	827.417	1016.96	174.823	2516.56
278	8	MT-△slr1588_48h_2	80.2879	100.719	117.175	49.5414	281.819	21.0408	285.938	216.351	485.074	860.146	170.312	235.514	38.0079	102.023	17.7249	21.3223	817.291	64.5504	21.9336	88.6533	536.754	1724.53	178.947	2827.05
279	8	MT-△slr1588_48h_3	107.589	69.3168	127.737	40.8747	324.346	26.2723	292.059	210.848	442.875	600.437	216.819	171.953	30.8251	111.743	41.0941	20.386	751.665	87.4055	33.037	149.845	541.341	1015.99	179.941	2004.94
280	8	MT-△sll1673_48h_1	73.367	123.598	103.8	39.6349	234.531	29.2162	295.512	169.77	302.961	481.288	216.478	167.129	44.8814	106.501	35.4767	17.6471	794.512	60.4955	21.1806	107.87	617.316	1240.31	139.614	2217.73
281	8	MT-△sll1673_48h_2	86.1985	50.8966	137.296	45.8539	281.166	24.7312	304.865	198.04	336.154	614.783	288.479	191.056	36.7624	108.699	46.733	29.3963	802.256	68.8309	39.2231	98.3595	506.293	1409.1	131.811	2266.88
282	8	MT-△sll1673_48h_3	67.7368	119.161	111.459	47.3882	230.937	20.7305	227.781	169.844	230.23	615.201	254.433	141.338	30.152	66.6318	29.9125	15.7861	847.221	30.7731	33.2258	90.0516	744.677	1300.94	162.584	2354.59
283	8	MT-△slr2041_48h_1	85.6748	23.7689	150.305	94.9008	297.022	20.0643	287.176	233.146	377.621	499.309	316.456	290.865	35.6045	115.788	57.6907	28.8914	857.129	93.3561	49.6492	75.8038	401.365	1105.36	132.054	1887.09
284	8	MT-△slr2041_48h_2	66.9942	51.467	97.8611	97.7615	239.816	25.5793	234.748	209.296	320.121	586.914	292.524	165.265	27.8334	78.8571	33.9255	17.4265	785.686	69.6486	23.3318	108.35	276.454	897.219	130.164	1916.68
285	8	MT-△slr2041_48h_3	57.7859	82.4616	127.777	67.04	256.179	42.1885	266.816	178.277	306.722	725.84	296.097	214.302	27.6024	93.3308	51.1729	15.3603	1136.09	70.6703	40.1596	75.2542	203.909	1144.36	202.418	2613.32
286	9	wt9_48h_1	55.042	176.167	1.25	46.917	1.292	1.458	0.708	196.792	322.25	433.917	256.25	1214.5	23.875	355.417	126.042	19.292	635.958	232.75	47.167	103.708	81.25	443.042	97.875	2104.54
287	9	wt9_48h_2	38.542	121.667	4.292	39.625	3.917	3.25	3.125	57.208	244.042	499.708	416.042	61.208	27.063	77.25	16.958	8.625	807.792	33.25	9.5	83.208	121.958	587.458	54.917	2078.08
288	9	wt9_48h_3	46.167	83.917	5.583	75.5	5.542	4.417	3.167	93.167	109.667	526.875	137.792	41.167	30.25	70.917	25.333	34.792	661.208	43.542	18.25	168.792	217.833	583.417	114.292	1886.12
289	9	MT-△slr1983_48h_1	55.8941	79.9094	5.76033	36.5039	3.35075	3.6092	2.66999	101.208	260.812	452.23	216.884	171.484	36.3739	188.17	47.4612	35.944	730.047	95.1481	24.8874	72.071	223.082	487.518	75.4111	1958.83
290	9	MT-△slr1983_48h_2	45.0497	125.014	3.29278	84.5128	3.53711	1.68329	2.16173	90.0544	185.63	460.526	278.381	191.338	22.2967	132.989	30.1868	11.2451	662.495	93.9062	8.30339	61.9222	201.426	538.869	79.6661	1731.53
291	9	MT-△slr1983_48h_3	33.9481	115.181	3.3971	46.4908	2.48764	1.64941	2.02503	95.8184	165.097	130.004	236.743	144.504	24.3435	146.052	43.0987	24.1922	725.063	92.6185	19.1281	97.0755	181.975	523.786	78.5171	1792.93
292	9	MT-△slr1760_48h_1	46.4135	161.163	2.98662	47.458	8.0799	6.04916	0.9625	115.87	208.245	477.415	169.467	353.222	19.5977	143.736	40.2263	17.8842	639.331	83.9601	27.1643	46.083	118.417	502.883	87.3752	1901.12
293	9	MT-△slr1760_48h_2	35.9696	124.63	2.36283	35.167	3.93498	4.10112	1.2978	134.777	207.494	514.466	208.907	366.426	38.4212	132.426	48.8674	17.8079	771.528	69.0006	27.5213	47.917	125.083	552.476	74.7386	1874
294	9	MT-△slr1760_48h_3	56.1042	136.05	1.93595	57.417	4.91809	5.39954	1.6331	105.989	221.635	531.214	196.664	461.02	37.5962	128.833	56.1009	17.6553	935.44	126.738	15.9178	124.083	196.778	548.867	109.741	1993.01
295	9	MT-△sll5059_48h_1	42.4305	110.293	4.88949	34.042	3.79417	1.64045	4.1419	87.7082	280.391	504.607	333.112	484.282	15.343	145.307	76.2592	29.0775	865.536	88.5418	38.1722	105.542	144.372	662.846	67.7121	1711.71
296	9	MT-△sll5059_48h_2	50.8826	99.4661	4.46339	71.917	2.63484	2.15309	3.0625	144.566	218.663	534.402	148.226	307.771	39.6075	167.174	66.8389	53.6521	936.052	125.978	20.9755	222.958	108.798	509.239	88.4192	1766.95
297	9	MT-△sll5059_48h_3	50.7607	168.183	6.56316	39.583	2.28325	2.66573	2.2169	168.91	262.355	514.539	202.619	370.354	42.4698	150.878	84.4812	30.8328	981.897	93.7054	23.2662	175.75	136.286	636.44	112.499	1816.39
298	9	MT-△slr1213_48h_1	34.5319	161.958	3.14369	59.4424	4.52589	3.41033	2.41711	83.0935	256.989	385.057	234.731	392.36	31.9275	187.563	66.5571	23.0124	601.371	96.2043	24.7723	108.078	239.518	427.329	80.9245	1718.88
299	9	MT-△slr1213_48h_2	31.466	122.148	2.20582	56.917	4.50501	2.6353	2.01466	77.1395	209.243	475.893	217.383	466.805	38.0364	171.092	50.2314	21.0873	657.007	127.276	17.3877	133.05	265.913	440.727	75.8015	1805.24
300	9	MT-△slr1213_48h_3	49.6845	166.7	2.43042	49.0982	3.08584	3.68092	2.6951	88.0742	213.302	458.966	203.106	404.85	44.1483	190.521	45.1797	21.3834	653.114	123.975	19.7523	111.574	214.977	439.206	91.1157	1836.7
301	10	wt10_48h_1	107.375	45.875	402.792	118.375	1606.5	170.5	1119.71	244.833	555.125	92.708	1621.79	154.75	182.333	1369.46	132.417	446.75	1053.67	371.167	1351.29	330.792	2077.33	22167.1	554.125	8646.46
302	10	wt10_48h_2	118.5	38.292	295.958	151.042	1612.29	163.375	1155.33	236.667	537.917	90.5	1063.25	201.375	176.125	1354.38	255.167	390.833	1923	427.917	1615.38	414.083	2241	20569.7	553.625	7802.33
303	10	wt10_48h_3	131.708	49.167	291.292	170.583	1667.17	187.833	1150.58	331.792	555.917	99.458	1187.62	149.083	233.875	1400.96	253.5	570.917	1569.96	436.083	1744.75	426.917	2267.33	18524.4	569.292	6730.5
304	10	MT-△slr0947_48h_1	108.535	41.6598	326.76	76.4539	1373.98	236.447	1409.46	333.843	608.438	65.7198	930.19	163.943	165.651	1338.39	172.54	444.402	2274.48	434.302	1165.13	715.618	1652.45	23090.5	467.199	7026.65
305	10	MT-△slr0947_48h_2	89.6881	43.226	278.523	96.9966	1553.48	250.938	1537.98	323.797	380.109	80.3252	631.005	173.317	153.901	1536.1	199.397	433.478	2180.19	447.282	1475.79	928.786	1265.47	20114.7	553	7207.65
306	10	MT-△slr0947_48h_3	102	54.7103	333.172	109.351	1622.94	333.313	1603.01	388.445	504.494	88.6865	645.774	162.783	148.717	1280.27	182.306	459.939	2765.79	424.028	1540.15	715.298	1768.37	23423.1	577.856	6726.69
307	10	MT-△sll0396_48h_1	122.425	36.7157	282.736	171.298	1276.75	398.232	1173.18	298.874	549.062	109.55	1222.84	197.818	208.485	1342.43	237.383	502.949	2734.86	424.056	1667.1	516.163	3509.29	24752	559.449	8668.12
308	10	MT-△sll0396_48h_2	110.927	24.7074	315.016	140.333	1483.45	261.377	1010.88	342.898	608.96	87.9105	1335.97	165.321	164.756	1295.96	202.314	435.286	2009.11	404.111	1645.27	426.787	2047.9	20960.3	676.491	8121.17
309	10	MT-△sll0396_48h_3	129.738	30.9186	358.505	145.527	1614.92	316.843	1100.73	410.844	686.958	109.999	1243.03	202.318	210.473	1380.61	209.708	510.22	2406.75	530.721	1822.84	481.667	3316.55	26389.8	558.927	8297.27
310	10	MT-△sll0797_48h_1	107.006	20.497	288.341	138.829	1473.32	223.331	1243.65	340.13	539.126	81.1481	1484.06	89.3269	209.371	1579.89	180.936	397.016	1983.89	398.62	1514.84	226.751	2356.8	21448.2	671.878	8712.99
311	10	MT-△sll0797_48h_2	92.3361	18.2891	199.856	126.661	1249.78	357.816	1112.23	266.719	409.627	67.8507	1172.42	153.654	199.209	1392.82	248.647	520.782	2314.28	463.947	1601.67	387.761	2139.14	15191.5	641.77	8604.87
312	10	MT-△sll0797_48h_3	74.0545	17.9429	248.069	115.11	1228.3	324.857	1251.15	272.723	425.302	62.4408	980.01	166.237	223.724	1461.59	205.797	498.432	2361.91	385.178	1585.42	403.325	2236.52	17784.9	651.776	8177.41
313	10	MT-△sll1330_48h_1	70.926	38.5095	417.461	117.638	1453.18	59.9259	2238.48	327.324	416.951	132.093	1776.29	192.319	190.596	1510.63	221.776	369.691	1201.71	365.954	958.353	172.799	21553.5	16899.3	656.302	8314.22
314	10	MT-△sll1330_48h_2	144.452	40.4424	394.989	145.732	2000.26	62.7137	2630.16	366.094	419.307	191.147	720.597	175.07	184.416	1903.86	288.621	428.933	979.471	385.033	1196.28	128.75	13719.3	18820.6	627.498	9117.45
315	10	MT-△sll1330_48h_3	87.2706	38.0954	351.292	139.375	1460.1	57.4173	1899.48	288.672	312.643	136.827	831.808	143.573	171.164	1412.39	254.341	415.998	955.119	337.483	1044.17	85.921	19299.3	19754.4	314.488	8563.78
316	11	wt11_48h_1	122.583	35.125	286	88.958	1059.08	119.708	878.583	515.542	962.667	16.625	689.25	120.958	28.125	3319.33	1419.04	177.25	756	88.125	1516.33	245.417	1631.33	5749.29	114.875	3027.62
317	11	wt11_48h_2	135.458	32	252.375	93.25	1066.83	92.833	829.083	444.375	978.625	18.167	681.25	101.708	38.792	3379.79	1483.58	216.625	939.625	85.833	1428.88	276.417	1658.08	5914.33	121.542	2638.83
318	11	wt11_48h_3	100.167	13.375	256.5	106	1107.67	199.417	899	484.917	1004.38	17.458	660.167	79.958	44.833	3734.92	1281.46	172.875	843.875	82.125	1715.21	259.625	1070.58	5211.12	116.583	3734.62
319	11	MT-△sll1708_48h_1	50.8627	20.0093	125.143	79.9294	713.924	95.2816	790.566	338.347	555.854	12.9508	375.03	113.904	27.3986	1717.73	610.401	101.89	931.475	81.147	1116.14	225.888	1085.85	7492.71	133.17	3367.26
320	11	MT-△sll1708_48h_2	77.5448	18.3165	220.181	95.9146	881.406	88.1125	905.486	385.587	635.785	11.4425	455.884	119.818	28.0724	1551.39	623.305	107.713	848.806	37.5782	1105.01	278.132	543.193	8445.2	156.088	4421.95
321	11	MT-△sll1708_48h_3	54.0312	20.2478	146.7	82.1462	792.518	74.1065	832.39	346.994	461	11.6557	410.453	80.6944	29.4694	1873.32	480.497	95.0648	918.194	49.8354	1376.61	247.912	1145.3	6832.12	109.991	3024.62
322	11	MT-△slr0312_48h_1	174.863	26.4281	191.545	109.093	1436.45	103.625	1053.71	491.265	982.284	17.0366	600.722	501.572	26.7084	9474.95	2789.56	195.406	455.627	102.068	2033.93	177.206	1559.87	5385.43	92.2933	3174.15
323	11	MT-△slr0312_48h_2	88.3599	24.2249	157.558	94.3028	1439.11	185.391	965.826	366.268	637.871	20.1409	600.157	700.566	32.0505	8361.5	2678.83	158.195	659.708	77.6482	1502.31	192.053	1570.9	5213.38	65.4147	2907.64
324	11	MT-△slr0312_48h_3	87.4721	30.1619	130.208	113.285	1119.23	110.439	968.529	341.29	743.327	16.3819	592.643	526.778	28.2045	7074.49	2717.49	182.427	674.684	88.3537	1829.04	254.653	1691.69	5623.28	98.8585	3293.35
325	11	MT-△sll0485_48h_1	99.2636	25.4406	255.035	80.9619	1307.05	300.375	1029.69	378.11	809.089	14.0114	691.867	548.15	21.9546	7757.1	2013.43	189.489	1333.12	91.5113	956.402	382.983	1707.4	5306.2	81.2569	2692.8
326	11	MT-△sll0485_48h_2	86.9874	26.9058	172.444	92.3588	1271.56	192.491	894.996	586.655	892.231	14.4297	341.893	662.568	39.2081	7080.67	2185.79	216.203	764.033	64.1806	1349.29	187.559	2185.17	5024.5	93.0549	2700.8
327	11	MT-△sll0485_48h_3	100.153	26.6128	256.918	73.6433	1243.56	292.143	941.902	417.192	1069.37	17.2489	533.677	498.363	34.4543	8767.65	2400.98	210.671	1001.28	87.2194	1103.95	225.2	1318.1	5226.13	104.901	2828.45
328	11	MT-△sll0039_48h_1	82.2305	26.8223	230.229	88.0143	772.181	90.6156	1087.94	432.439	886.736	16.9273	771.827	105.549	29.4545	3370.06	1144.67	195.088	1007.78	71.5622	1314.63	259.98	1644.12	5536.63	94.2699	2835.07
329	11	MT-△sll0039_48h_2	94.4384	23.1198	182.105	130.422	1000.73	138.303	1024.37	488.082	968.504	16.3094	654.257	99.9824	28.662	3141.16	1141.45	229.189	1117.5	87.3927	1603.89	207.304	1307.55	5219.74	139.963	3216.28
330	11	MT-△sll0039_48h_3	77.0209	25.8887	241.148	127.046	832.258	69.9316	912.27	456.841	967.777	19.2514	604.1	107.803	38.236	3162.4	1122.27	194.872	1109.57	76.7803	1580.57	278.963	1402.95	4935.92	96.5231	2883.11
331	1	wt1_72h_1	21	13.417	287.792	26.25	1099.88	49.5	940.667	154.375	272.25	134.75	705.708	196.75	29.958	172.958	79.458	64.625	2282.83	894.667	131.333	1619.08	516.583	15822.4	375.458	6045.29
332	1	wt1_72h_2	17.25	22.667	457.333	23.083	1145.08	56.292	1082.88	183.292	329.75	117.917	523.333	212.208	31.667	132.667	55.875	44.542	2849.79	802.458	124.208	1782.62	537.792	16718.2	462.833	7012.33
333	1	wt1_72h_3	16.375	12.875	388.208	31.625	1055.58	51.75	1018.21	150.625	317.583	150.917	619.958	192.25	27.792	169.708	90.708	71.167	2209.75	901.958	105.292	1471.46	582.083	17505.9	402.5	6115.29
334	1	△sll0649_72h_1	23.8294	27.9552	368.563	31.2633	1533.01	47.4273	963.303	146.25	410.42	111.708	531.292	186.333	19.0345	171.533	82.25	64.6786	2295.49	707.958	128.341	1923.12	638.357	14654.8	507.998	6187.46
335	1	△sll0649_72h_2	16.5774	15.665	332.955	32.2528	1410.85	47.855	869.621	150.958	339.341	126.542	532.326	205.708	31.0393	142.934	86.208	54.0987	1997.02	746.708	116.097	1676.13	622.107	16278.8	385.408	5919.38
336	1	△sll0649_72h_3	21.2976	14.9094	406.851	29.2233	1324.98	40.5303	1001.97	152.375	342.265	121.833	495.625	193.083	19.4766	156.778	76.625	61.6214	1979.37	768.458	151.331	1454.08	633.885	16885.1	392.998	5901.25
337	1	△slr1584_72h_1	12.7987	14.3267	247.548	17.3826	1144.03	53.8478	1268.73	101.633	206.682	129.804	717.787	212.616	19.102	153.158	52.7489	48.5366	2157.33	866.721	111.489	1632.55	331.611	19008.5	485.895	7570.98
338	1	△slr1584_72h_2	12.4924	14.9315	347.505	22.3696	1081.84	51.6509	1075.88	94.0579	249.888	142.813	659.696	219.985	15.1917	162.235	55.6241	56.9864	2422.36	828.469	100.912	1619.24	335.799	16184.9	512.781	7004.31
339	1	△slr1584_72h_3	13.3928	15.761	267.078	21.4143	1103.29	49.113	1002.18	109.412	257.26	130.093	673.881	221.84	17.3298	131.177	70.3482	58.6952	2396.83	951.866	115.809	1589.3	320.7	17658.9	463.347	6861.42
340	1	△sll0789_72h_1	23.6078	22.4388	465.24	24.18	1204.75	25.5796	1014.78	143.848	303.126	111.068	820.313	221.914	33.7109	294.703	70.4928	44.1837	2773.32	901.975	133.576	2000.9	630.653	20386.7	399.051	7885.85
341	1	△sll0789_72h_2	20.6256	22.0312	406.221	19.4517	1251.44	23.9038	806.213	216.819	345.579	100.703	906.808	200.772	31.2806	345.504	86.5887	46.2355	2304.46	1015.99	107.872	1610.64	856.198	18915.9	429.736	8098.84
342	1	△sll0789_72h_3	34.4077	7.13933	406.656	20.5224	1342.34	19.5005	1087.8	190.14	273.142	107.664	804.453	221.983	36.3802	297.676	69.0048	42.1991	2978.48	800.944	139.071	2210.44	626.789	16837.4	373.742	7034.46
343	1	△slr0081_72h_1	12.4635	10.7096	93.7726	24.9391	1132.58	81.5648	2102.87	94.8517	138.427	176.966	760.043	206.906	39.0866	112.596	62.4449	57.9984	746.353	783.842	150.186	653.305	396.012	15381.5	414.465	6618.51
344	1	△slr0081_72h_2	11.1134	17.6458	164.537	16.685	879.287	62.0643	1791.86	125.742	134.155	141.385	562.315	204.155	29.6603	171.119	63.4893	44.5251	900.784	1001.1	133.702	789.642	513.144	16892.8	441.924	6820.17
345	1	△slr0081_72h_3	13.8446	10.302	158.302	23.9573	1032.31	49.0657	1561.6	105.388	156.081	162.58	734.031	219.965	39.897	118.536	57.6769	55.0585	964.305	920.028	132.06	779.503	705.419	17743.9	479.993	6531.84
346	2	wt2_72h_1	61.25	32.5	676.667	28.917	414.583	28.333	447.5	607.083	331.667	42.5	162.083	930	64.167	30	27.917	36.667	1924.58	155.417	107.083	1137.5	168.75	3910.42	290.417	3481.25
347	2	wt2_72h_2	40	16.667	461.667	28.875	357.917	11.25	365	576.25	182.917	37.458	123.75	732.083	66.667	27.5	20.417	39.583	1604.17	167.5	92.083	866.25	199.167	2924.58	257.5	2337.92
348	2	wt2_72h_3	31.25	11.667	364.167	24.458	364.167	9.167	415.833	451.667	242.917	42.917	132.5	780	72.917	24.167	24.167	45.833	1646.25	110.833	74.583	958.333	16.525	2906.67	270	2477.92
349	2	△slr0115_72h_1	26.1222	25.2852	409.81	22.3611	223.311	17.3343	551.168	539.294	224.137	58.3674	100.72	699.313	43.8144	25.4682	17.382	33.1683	696.072	127.326	73.0812	368.536	259.333	2903.82	372.071	2539.17
350	2	△slr0115_72h_2	21.5938	22.5137	309.637	27.6179	192.09	25.6759	549.521	378.624	200.895	45.6845	172.113	716.518	63.6597	27.4079	17.9818	32.8473	960.872	126.612	92.825	559.644	139.829	3717.72	318.079	2577.86
351	2	△slr0115_72h_3	26.5841	12.0776	376.658	27.3414	243.09	12.4743	638.655	655.793	154.38	65.1884	130.668	621.533	50.8876	30.2	19.4215	29.2638	891.983	130.545	82.6135	560.077	157.276	3354.17	192.486	2577.75
352	2	△slr1837_72h_1	129.01	18.8153	459.958	27.8053	371.332	15.2409	465.85	838.587	256.419	42.4344	88.221	1152.15	74.5849	23.8428	24.0703	61.9095	1691.12	87.2464	88.2296	875.184	147.715	3204.41	321.328	3002.54
353	2	△slr1837_72h_2	62.6806	12.9414	450.898	37.2283	399.416	18.3647	411.763	668.455	276.449	44.6483	81.2589	957.118	54.0097	24.2724	19.8639	39.1008	1790.32	146.619	70.8979	927.942	112.492	2888.25	300.16	3468.14
354	2	△slr1837_72h_3	79.8965	23.7901	540.899	26.232	348.66	16.8494	433.346	907.151	289.385	42.9118	68.9506	1060.98	59.1535	28.2019	26.4062	53.005	1442.42	114.293	97.2898	805.07	164.976	2880.84	247.107	2837.28
355	2	△slr6040_72h_1	146.417	24.3225	683.41	29.641	696.923	15.204	385.335	1239.51	404.178	55.1907	242.137	4320.09	171.325	55.3375	20.3871	42.5397	3067.32	330.519	117.692	1945.36	1061.28	8183.4	722.222	3571.62
356	2	△slr6040_72h_2	106.629	29.3558	435.37	32.3568	692.997	13.6832	413.156	765.891	341.084	47.2233	271.564	4433.26	289.005	44.73	25.5268	30.6915	3109.93	260.574	160.569	1950.08	709.803	8651.29	754.58	3644.95
357	2	△slr6040_72h_3	126.382	29.6462	560.291	20.6273	683.224	17.0673	410.682	1277.38	385.299	49.1214	254.989	2461.38	199.029	59.2509	22.7894	34.5748	2366.69	300.605	202.23	2019.49	776.298	8288.74	834.227	3552.17
358	2	△sll1592_72h_1	57.3059	12.1299	491.51	36.3586	422.533	12.3527	363.94	740.976	262.831	49.868	172.043	947.452	103.271	41.5274	34.0122	49.789	1360.46	157.77	90.239	989.839	141.234	3145.53	297.881	3146.42
359	2	△sll1592_72h_2	55.0896	19.04	535.013	38.1301	476.906	14.6569	407.189	757.718	284.511	35.7232	188.672	772.11	83.6422	34.8294	36.0435	44.5201	1321.39	147.492	89.1388	729.873	104.34	3292.86	328.907	2677.5
360	2	△sll1592_72h_3	63.2682	21.2455	576.077	41.9732	475.333	16.7916	396.118	696.469	228.292	43.3474	164.077	794.45	98.7722	35.2897	36.8453	46.5713	1431.96	137.813	92.4757	816.88	134.531	3039.58	295.487	2479.03
361	3	wt3_72h_1	55.833	79.333	69.917	221.5	107.125	6.958	141.542	1131.33	66.708	794.417	44.625	355.667	16.083	40.125	29.208	14.875	1065.29	53.792	44.5	627.792	179.417	2110.92	166.875	3462.46
362	3	wt3_72h_2	67.833	69.583	50.958	291.625	81.458	12.167	107.708	1036.62	69.25	791.75	40	335.625	19.042	39.042	25.292	15.083	1108.33	45.708	35.167	594.75	101.125	2049.67	216.625	3399.54
363	3	wt3_72h_3	46.583	71.958	107.125	239.583	78.875	15.5	176.292	1077.21	128.25	782.833	71.625	350	20.083	45.833	33.292	16	1163.79	67.75	42.083	612.083	184.333	2145.75	195.417	3453.71
364	3	△slr1783_72h_1	102.292	109.776	90.5212	265.182	100.336	21.5132	125.698	1006.28	85.0443	691.545	49.0701	404.486	8.34108	35.0713	34.36	15.1459	1152.67	54.0361	41.3242	566.273	161.99	2187.66	207.486	3659.87
365	3	△slr1783_72h_2	117.222	130.514	114.341	388.462	116.737	22.9079	155.18	1104.37	93.4743	693.245	67.9946	361.2	10.236	36.4803	37.5082	18.134	1107.25	55.2472	40.409	614.052	144.998	2410.63	174.773	3308.19
366	3	△slr1783_72h_3	96.6199	96.2863	93.4171	256.662	102.346	21.395	142.974	1029.47	103.202	764.916	59.2614	363.432	9.23697	41.5133	33.3492	15.7991	1140.51	48.577	40.2783	610.946	158.512	2255.62	199.432	3560.1
367	3	△slr1909_72h_1	74.9433	102.835	105.981	247.9	76.6487	13.2619	120.925	1980.49	94.6877	847.256	27.7284	367.268	19.3818	75.7791	48.4162	15.291	954.333	54.3837	43.612	476.088	195.495	2182.9	174.116	3585.8
368	3	△slr1909_72h_2	94.291	132.54	93.2227	221.006	76.7071	13.82	116.927	1817.6	89.049	742.739	30.346	270.699	21.9666	58.7541	52.3536	13.1679	834.279	55.3761	44.4356	498.778	159.333	2150.24	185.91	3561.49
369	3	△slr1909_72h_3	77.8684	112.036	110.962	263.111	84.2926	13.7234	123.778	1666.85	95.1225	781.134	29.3831	317.646	18.1132	59.2572	49.6484	13.5672	880.565	51.5943	42.8668	453.302	156.948	2027.79	176.475	3752.14
370	3	△sll1544_72h_1	28.1953	74.5454	24.4902	163.299	67.787	9.86778	120.435	362.269	36.3571	728.724	46.0011	396.874	19.974	31.9418	34.1777	14.259	885.157	46.1084	38.6559	548.72	152.623	2071.89	177.783	3683.84
371	3	△sll1544_72h_2	33.1078	100.234	35.0527	169.012	70.1221	7.07349	139.405	434.724	45.0543	573.483	47.2443	252.238	21.6057	35.6387	24.8928	16.2563	1112.21	41.6203	42.4114	587.768	147.261	1896.74	188.24	3419.87
372	3	△sll1544_72h_3	39.2485	92.4308	45.9789	198.058	82.3049	5.76359	146.651	550.742	70.0398	698.674	53.1336	356.371	16.5292	37.0373	28.6171	16.8666	1208.66	55.6223	47.6786	620.821	121.095	2029.73	186.347	3568.91
373	3	△sll0921_72h_1	58.4022	126.464	97.906	256.888	122.99	19.1333	310.254	1290.82	99.6502	983.329	57.1152	351.596	9.18355	56.6487	68.0514	23.4822	427.605	59.0254	50.9103	291.064	142.391	2539.9	228.314	2988.76
374	3	△sll0921_72h_2	44.8254	76.8973	44.628	225.58	95.6508	21.6342	243.663	842.02	68.2084	1077.98	47.1819	370.381	12.3778	82.3703	62.0628	17.8435	412.76	47.2001	51.6835	255.094	158.168	2052.03	234.419	2969.41
375	3	△sll0921_72h_3	59.4792	90.5612	70.0809	274.61	85.5496	17.8836	270.155	1277.48	85.0928	962.316	46.7445	426.435	10.9672	70.6809	62.8054	19.1524	362.012	62.2318	49.6783	202.034	154.212	2081.75	223.596	3031.16
376	4	wt4_72h_1	45.375	28.083	436.125	31	476.667	33	490.042	252.958	472.792	11.833	493.167	89.417	25.583	123.167	81.25	30.667	2167.04	58.083	152.792	1538.08	366.917	5584.96	97.542	4269.71
377	4	wt4_72h_2	59.792	23.583	507.75	38.708	471.958	19.583	451.667	333	480.292	12.417	304.958	94.792	29.042	125.667	69.875	34.125	1789.25	64.333	129.75	1336.67	337.917	3464.12	128.208	4198.21
378	4	wt4_72h_3	46.5	22.417	449.792	46.542	483.375	12.5	456.458	209.75	364.042	13.292	334.333	117.458	33.792	142.375	75.5	30.292	1514.46	59.708	97.458	1401.17	258.5	4356.21	74.5	4416.25
379	4	△slr0474_72h_1	55.3241	32.4208	432.586	32.8448	531.62	19.9899	500.469	205.854	697.122	13.0013	501.704	98.7892	38.3021	131.924	43.1275	35.961	2364.31	84.0984	124.325	1482.16	466.483	4087.16	78.4014	3557.68
380	4	△slr0474_72h_2	59.1458	32.2269	386.25	40.5218	369.209	26.2424	435.666	286.871	570.813	12.1125	554.939	96.9062	36.1008	116.59	32.258	26.6771	1997.33	59.3618	104.037	1529.78	379.26	4302.92	86.181	4494.21
381	4	△slr0474_72h_3	59.2855	27.2927	284.773	34.6016	431.006	16.4839	359.225	256.079	523.928	13.3334	491.7	96.0249	32.2125	96.8342	30.6226	28.931	1852.51	48.8203	81.7991	1242.04	356.463	4375.64	92.6853	4194.2
382	4	△sll1292_72h_1	56.2707	20.6831	240.196	42.2079	482.539	12.7892	910.214	292.787	482.172	13.6933	372.321	116.968	19.0049	165.627	84.5019	23.8846	1193.85	54.014	148.776	776.219	219.765	4204.7	102.389	4164.84
383	4	△sll1292_72h_2	51.0816	23.3155	263.656	45.5605	567.091	16.1997	963.385	295.76	390.708	12.8798	410.07	115.085	24.3601	164.248	87.4248	28.5698	1499	59.0534	190.259	855.876	322.958	4630.72	123.069	4809.74
384	4	△sll1292_72h_3	63.7384	25.8227	620.872	35.4445	683.763	19.0418	1079.59	284.011	749.129	14.3345	502.672	113.117	19.5913	159.411	75.1527	32.0847	1443.22	60.516	146.694	863.381	242.748	5097.22	113.258	4618.85
385	4	△slr1037_72h_1	57.9574	21.6635	1262.6	39.1593	574.585	10.4472	567.034	856.483	937.267	16.0462	464.842	104.619	32.9159	136.492	86.0739	31.3746	2264.48	67.5964	154.463	1721.63	392.517	4405.58	160.423	3701.77
386	4	△slr1037_72h_2	52.4415	24.5299	870.93	31.4107	459.259	20.6623	498.863	509.736	648.629	12.5712	295.233	78.091	26.9629	135.957	63.1863	27.6327	2185.78	75.5744	95.39	1717.53	420.737	4460.67	198.403	3982.27
387	4	△slr1037_72h_3	48.2583	21.2345	550.008	34.3214	400.061	13.6975	505.453	282.447	483.804	13.7854	446.408	85.3699	33.6847	110.508	56.5336	26.1935	1642.6	64.405	85.4152	1391.35	472.687	4444.96	167.036	3681.94
388	4	△slr1042_72h_1	104.532	41.9591	540.095	30.3252	444.397	19.8406	431.697	150.932	247.925	11.5537	448.58	74.892	28.5841	79.5699	75.2393	46.1878	2419.43	64.817	71.4779	2116.78	180.295	4886.5	171.571	3990.15
389	4	△slr1042_72h_2	62.846	38.8522	454.939	38.2531	469.227	18.3241	363.768	154.84	372.08	13.0122	437.636	94.6637	27.1992	115.797	89.2992	39.7601	2244.16	59.5535	61.0562	2537.3	185.576	4268.28	120.034	4943.68
390	4	△slr1042_72h_3	51.5859	49.4482	522.447	34.9563	503.131	19.0824	499.477	186.395	246.127	13.3914	342.911	66.6433	29.968	132.248	78.8901	32.8208	1909.97	53.3211	101.648	2094.19	203.18	4115.32	142.356	4770.73
391	5	wt5_72h_1	35.333	120.375	94.5	88.083	122.583	13.375	163.417	45.542	124.458	123.833	244.917	147.417	31.792	56.708	26.708	17.917	774.208	80.708	85.833	595.167	131.125	1832.25	63.917	2061.46
392	5	wt5_72h_2	36.208	94.75	99.583	72.667	144.583	8.917	162.167	27	122.333	131.375	259.458	100.458	40.458	52.625	19.375	23.167	648.667	54.083	76.333	409.417	119.458	1983.71	87.708	2093.25
393	5	wt5_72h_3	31.375	73	157.375	75.542	141.042	20.75	152.875	75.5	273.917	127.417	269.417	128.792	43.667	43.958	20.458	18.208	1071.21	60.208	71	676.708	137.5	1923.71	53.208	2134.62
394	5	△slr2024_72h_1	33.4633	79.7245	126.384	67.2237	127.451	14.2497	124.483	34.679	113.663	112.446	146.067	129.805	28.2883	76.429	21.5009	20.2029	724.571	33.8098	42.5361	676.886	106.772	2026.73	60.7639	1969.12
395	5	△slr2024_72h_2	41.9677	105.982	111.337	102.855	135.519	16.5063	211.033	37.4845	87.3436	123.814	114.246	149.097	28.0178	63.9698	23.1635	23.6312	630.872	71.9936	58.6208	624.708	152.053	1515.44	74.6484	1823.84
396	5	△slr2024_72h_3	30.9371	94.5915	123.91	83.8691	144.321	16.4231	122.406	34.9645	122.454	105.141	257.154	160.543	28.5588	61.8008	23.7001	16.7745	693.453	37.9613	51.7923	599.948	79.2163	1545.84	105.925	2007.7
397	5	△slr1982_72h_1	47.1211	92.7344	103.374	63.6574	139.426	18.4028	162.218	82.4949	204.471	131.342	188.171	90.546	38.0782	110.571	52.1877	13.1127	818.163	85.8977	68.7515	685.959	99.1565	2792.21	44.9985	1990.07
398	5	△slr1982_72h_2	33.8694	101.51	121.718	47.3078	137.228	13.1203	148.635	40.0684	85.9985	140.106	171.509	120.636	34.6574	48.648	25.2738	21.4617	630.835	45.9486	86.6428	429.09	141.54	2517.66	47.7494	2183.33
399	5	△slr1982_72h_3	22.5793	82.0597	95.916	38.0952	136.769	14.3331	155.12	42.6405	192.239	113.646	278.038	54.0728	31.2358	60.3762	46.1898	23.0659	652.918	77.6563	69.3441	558.622	74.0291	2680.81	71.0557	1984.33
400	5	△sll0038_72h_1	25.846	87.7695	124.144	80.6867	185.301	9.60337	379.295	48.7001	116.327	155.103	222.396	150.77	38.6306	62.1414	28.1662	27.0942	508.944	70.2344	106.456	276.97	113.345	1626.31	68.6949	1959.01
401	5	△sll0038_72h_2	27.9763	116.45	120.864	77.6307	168.711	8.81654	333.091	56.5853	140.074	129.471	189.112	144.54	45.3313	90.056	25.7292	39.7906	387.938	75.8009	138.428	250.428	146.508	1559.81	68.6665	2006.66
402	5	△sll0038_72h_3	31.2607	70.7858	117.175	76.1023	176.477	10.7904	302.838	59.2118	131.891	139.254	213.092	146.283	37.1573	88.0458	25.3716	26.3527	430.567	60.0043	115.018	249.395	131.922	1560.99	74.5985	2359.03
403	5	△sll1291_72h_1	32.4497	87.6212	110.349	85.1515	187.793	8.39488	322.618	48.2632	209.863	130.833	319.659	137.066	30.2052	55.4277	21.105	19.6147	622.431	52.3131	71.976	434.579	108.464	2082.03	73.4472	2421.41
404	5	△sll1291_72h_2	29.7856	112.839	96.5924	71.1819	171.195	9.33466	392.927	50.4302	234.881	131.526	261.677	126.048	38.0941	46.6044	12.2166	21.9185	543.116	50.2944	66.5505	340.957	112.405	2063.03	58.7343	2440.95
405	5	△sll1291_72h_3	30.2852	95.2446	107.464	76.911	181.879	8.01897	324.332	52.6123	227.387	150.591	205.461	175.424	40.6915	53.3167	13.5212	18.827	706.549	88.19	59.5277	404.166	71.9873	2289.73	95.7086	3044.89
406	6	wt6_72h_1	47.375	141.917	14.083	243.042	12.417	6.75	90.625	63.083	48.667	235.042	90.75	28.167	39.083	14.875	8.375	76.792	1189.5	45.75	12.333	114.333	7.125	537.458	81.333	1027.71
407	6	wt6_72h_2	56.667	136.708	45.042	192.875	12.292	7.292	56.75	62.708	61.958	286.917	65.042	36.667	85.083	7.125	13.458	30.208	1718.5	28	10.667	420.667	11.75	698.625	75.167	1246.5
408	6	wt6_72h_3	72.333	91.958	0	223.625	12.792	2.792	44.75	43.417	63.958	371.583	39.667	20.75	14.375	5.417	4.917	39.542	981.458	25.042	12.5	87.792	8.083	535.833	57.625	936.667
409	6	△slr1214_72h_1	82.7612	104.006	44.2791	167.667	15.125	2.15751	39.2395	132.667	77.7039	282.009	41.5856	23.3856	175.016	10.0221	7.68062	50.2967	1487.45	30.6504	11.4678	367.361	10.8371	594.573	58.1188	1081.8
410	6	△slr1214_72h_2	95.8354	116.48	34.0579	177.25	28.917	2.51059	74.2133	79.75	112.88	268.514	102.801	48.8696	205.597	8.8657	12.9254	29.445	1317.35	36.2117	11.687	299.238	6.90273	583.33	58.2783	1103.84
411	6	△slr1214_72h_3	72.3683	133.237	35.7646	211.292	14.125	3.96109	56.8592	109.083	93.3165	193.344	57.7021	39.2127	148.135	10.1187	9.66597	37.5125	1382.49	36.372	11.4319	349.195	10.1852	549.563	69.783	880.823
412	6	△slr1594_72h_1	54.685	181.111	15.8381	255.875	23.417	10.4676	90.9167	40.75	66.4321	307.382	71.0079	68.3064	13.8785	9.46819	18.7322	64.5998	1115.98	55.4528	25.1279	86.92	9.24088	736.936	80.1327	1126.1
413	6	△slr1594_72h_2	49.908	114.15	19.1525	150	14.667	5.48119	96.219	33.833	59.5656	261.862	124.89	34.462	16.216	9.25137	10.5274	47.5203	1103.78	74.9485	9.89793	97.8644	9.91539	813.76	80.9686	1179.69
414	6	△slr1594_72h_3	46.1788	129.296	15.2822	171.417	25.208	5.83512	49.5317	33.5	65.849	218.86	70.0857	23.9409	16.6542	5.01135	9.81613	36.5695	1031.69	33.4633	11.7965	160.626	5.95841	676.06	63.3342	1064.11
415	6	△slr1041_72h_1	39.841	89.4923	14.8968	197.023	18.2664	4.25034	74.1293	48.2169	56.3935	335.488	109.48	30.2098	35.8305	11.9417	11.628	70.8687	1051.06	39.7315	13.3419	197.226	5.14037	649.597	64.2013	1415.95
416	6	△slr1041_72h_2	62.8292	137.129	19.8049	178.47	17.012	8.58401	77.7442	47.9081	78.8426	243.596	143.34	35.7391	52.2688	12.2512	10.0925	118.891	1361.62	51.5209	10.5404	179.577	6.63342	701.692	74.4665	1296.73
417	6	△slr1041_72h_3	35.4088	161.123	23.5153	186.273	16.5294	4.77838	88.1997	66.4851	87.1054	313.588	82.4223	27.7285	34.548	9.19911	19.8642	36.4298	1455.02	74.2508	11.5199	255.182	5.29739	565.208	70.4811	1228.82
418	6	△slr1693_72h_1	87.8783	120.142	15.3101	345.602	11.5928	6.2785	53.579	53.4294	68.7613	302.007	58.6917	17.6531	17.6042	16.1459	11.6787	28.3149	1271.01	31.7483	16.5745	191.6	8.06314	524.388	82.3168	943.373
419	6	△slr1693_72h_2	109.267	141.507	21.468	215.135	12.7547	3.00024	52.4685	68.8074	62.2743	296.09	42.3445	17.3533	19.975	17.5644	10.278	30.7987	1083.24	34.7047	18.9057	192.002	8.92262	486.768	60.6263	1044.45
420	6	△slr1693_72h_3	64.5301	56.6549	20.7943	325.723	12.8818	5.50044	46.1584	63.1764	52.6397	274.19	65.8465	23.232	25.8425	13.0163	16.4213	80.1441	1028.73	37.0331	21.5704	165.059	7.64721	516.959	93.8139	1053.56
421	7	wt7_72h_1	50.792	57.875	291.25	53.375	191.25	18.333	163.5	249.125	306.667	380.667	132.75	124.667	66.667	25.833	23.667	10.958	2105.92	38.542	26.125	940.083	262.5	1094.54	123.167	1811.42
422	7	wt7_72h_2	39.5	35.667	268.125	65.958	161.625	1.458	180.667	261.167	229.708	380.417	96.333	56.167	47.708	46.167	17.5	14.125	1635.04	30.583	26.458	707.208	292.542	1063.21	132.083	1822.38
423	7	wt7_72h_3	42.292	82.792	347.542	67.292	187.75	14.458	187.458	297.125	147.667	566.625	62.5	113.292	104.167	30.875	24.875	7.792	1722.29	49.25	22.917	802.375	152.708	933.208	94.125	2031.38
424	7	△slr1305_72h_1	21.0145	84.7034	273.607	41.2919	102.384	22.9961	88.4923	166.733	250.483	574.208	122.242	106.814	62.4166	15.2823	29.1073	11.0411	2142.86	45.7385	27.7322	1055.77	119.384	1028.15	117.375	1692.05
425	7	△slr1305_72h_2	13.0943	67.5505	299.375	67.452	131.697	24.9468	75.2713	195.257	218.735	490.18	107.642	79.3362	64.7475	12.6862	22.8014	3.41514	2131.79	48.3269	24.8774	1141.41	111.972	1096.65	96.7348	1866.96
426	7	△slr1305_72h_3	27.9843	56.6829	233.347	56.594	120.866	24.2172	68.4467	139.863	177.463	463.039	95.486	96.9072	64.33	16.8575	17.2867	6.12094	1870.29	43.3948	28.8929	1109.76	110.911	1026.7	134.299	1936.73
427	7	△sll1879_72h_1	39.6234	76.779	167.485	88.0342	199.931	14.5417	281.415	274.366	275.927	630.522	125.026	101.533	69.9271	40.5716	13.9336	13.2041	1205.91	34.8778	21.9892	576.501	208.942	1055.9	85.15	2223.24
428	7	△sll1879_72h_2	22.7075	43.7169	95.8879	53.7876	172.362	8.25109	269.57	177.98	257.114	635.102	85.6071	100.381	64.617	29.7698	9.40541	12.1567	607.82	46.4749	30.8962	400.025	278.678	1011.94	101.159	1678.06
429	7	△sll1879_72h_3	36.1177	47.0231	101.303	58.3118	182.244	7.93164	279.545	207.38	270.038	648.842	108.485	101.606	66.9573	33.6909	10.625	13.2789	635.243	43.4313	24.5398	410.734	311.984	1120.83	98.5546	1937.38
430	7	△slr2100_72h_1	51.4282	72.4757	739.733	50.1971	269.85	13.4101	190.014	248.982	344.483	461.111	117.879	97.3908	39.3574	38.5781	17.847	10.5323	2053.42	38.4579	23.0996	668.323	192.584	957.01	152.333	1849.11
431	7	△slr2100_72h_2	52.7764	93.1177	358.035	51.0547	270.102	16.8009	288.409	297.583	340.092	491.259	157.67	88.8816	40.08	44.8622	16.0078	11.343	1690.94	33.3568	27.8795	785.306	160.442	1111.08	143.909	1756.57
432	7	△slr2100_72h_3	48.7309	70.1706	452.313	56.6744	210.135	22.185	273.905	212.273	276.091	461.765	110.652	79.2426	54.0479	37.6339	16.383	10.9691	1717.63	29.7561	17.725	729.667	106.396	1040.8	110.138	1719.34
433	7	△sll1624_72h_1	18.2935	43.0416	145.549	40.122	150.918	9.78571	164.133	230.6	137.195	453.851	77.7713	87.8318	52.8975	23.5137	15.3115	10.7901	2333.65	38.9215	28.5448	989.921	178.781	868.691	105.159	1795.17
434	7	△sll1624_72h_2	19.3841	47.7044	133.863	62.0376	128.88	9.59731	150.856	133.319	139.521	387.54	100.439	94.8361	73.0227	25.8147	25.3289	8.31245	2393.22	34.0412	31.346	1072.04	197.619	829.237	94.6028	1686.6
435	7	△sll1624_72h_3	24.8801	30.6454	117.893	63.4635	154.41	13.7375	173.321	196.777	146.778	322.714	86.6254	71.583	69.1231	30.7343	21.419	9.76735	2568.52	41.7033	42.4688	998.037	168.371	817.596	108.905	1557.16
436	8	wt8_72h_1	24.833	55.792	64.917	43.708	132.125	3.708	225.958	84.75	145.292	466.708	142.083	33.25	49.375	42.333	24.792	5.375	1641.75	33.458	31.125	876.125	137.625	955.25	138.833	1844.88
437	8	wt8_72h_2	47.25	148.125	58.375	48.792	172.542	12.083	206.125	43.417	60.5	585.083	147.292	33.75	78.25	21.5	10.583	15.375	1553.88	41.333	26.958	792.208	95.625	992.292	136.5	2187.83
438	8	wt8_72h_3	19.333	34.167	144	22.625	159.083	5.125	212.667	89.292	161.208	474.375	178.667	59	212.5	25.208	12.333	6.667	1821.58	44.792	34	942.458	136.375	863.458	139	1771.33
439	8	△slr0687_72h_1	36.4231	87.9867	131.956	36.8151	149.108	6.14313	220.056	90.6751	156.732	486.949	164.667	45.9129	118.792	34.5275	15.9781	10.3196	1507.72	46.2494	31.1412	917.901	168.747	907.384	182.722	1675.6
440	8	△slr0687_72h_2	25.3045	74.9603	181.468	43.6469	164.351	8.95326	295.285	144.591	93.7339	456.037	94.0434	51.0409	99.5833	36.6499	22.0525	6.0588	1841.85	43.4898	22.0764	895.355	212.093	900.447	175.941	1556.64
441	8	△slr0687_72h_3	34.3316	88.5148	151.79	45.3125	168.137	6.19267	256.201	129.621	136.715	524.343	145.923	24.8886	78.1617	32.7186	20.4257	7.49765	1439.53	41.8285	36.5801	872.809	151.204	945.52	202.017	1783.29
442	8	△slr1588_72h_1	23.9561	96.7616	146.97	34.5615	199.927	5.97615	169.216	106.829	254.857	359.609	133.65	44.9215	65.2757	23.2381	15.3676	12.1057	1469.97	31.9171	55.8932	679.834	131.638	918.448	143.887	1893.88
443	8	△slr1588_72h_2	24.3038	81.1302	264.691	29.2158	156.125	5.49211	273.236	170.229	372.175	553.738	193.063	60.956	43.2771	39.825	12.8964	11.5962	1670.52	39.5772	40.4529	753.475	102.968	1098.19	156.213	2103.84
444	8	△slr1588_72h_3	29.5382	88.8796	210.496	36.5833	125.209	9.09552	247.514	129.586	228.507	578.815	211.253	43.8314	51.5262	29.0275	12.295	16.3403	1457.01	36.5596	39.789	601.83	162.461	1233.16	163.299	2001.03
445	8	△sll1673_72h_1	37.5066	57.6638	58.4434	45.2635	173.169	4.72845	246.443	67.9222	137.281	478.564	126.747	51.6602	125.747	76.8952	21.551	10.7497	1833.23	66.7485	21.445	1019.06	100.281	929.964	204.152	2218.71
446	8	△sll1673_72h_2	27.9696	75.4984	72.2008	27.0915	156.478	5.83352	202.192	60.7881	73.3687	501.889	183.522	29.1277	83.5761	57.5739	23.4776	7.03214	1427.13	56.8608	38.0126	638.026	145.153	861.303	150.45	2178.42
447	8	△sll1673_72h_3	22.4398	76.7352	81.9709	60.8909	156.62	5.38453	250.717	87.6725	130.619	550.215	185.065	29.9857	104.66	44.1717	33.2898	7.89981	1606.1	53.9984	25.4088	852.059	119.809	785.404	125.539	1721.57
448	8	△slr2041_72h_1	48.4059	55.5265	42.5673	38.1953	131.637	8.66329	202.358	31.5084	88.3241	499.685	185.115	41.9998	49.0397	23.9565	18.2707	14.6226	1601.46	42.9479	41.9764	663.579	121.018	758.121	138.579	2005.53
449	8	△slr2041_72h_2	35.2094	140.814	40.9044	32.0006	98.7907	4.97034	156.588	27.7427	53.4279	481.198	118.928	31.7021	43.2192	22.4487	15.5913	8.08569	1637.96	34.6267	20.8352	628.971	138.959	755.544	128.343	1763.32
450	8	△slr2041_72h_3	30.9349	67.1718	28.8096	43.6442	129.957	5.97103	185.36	22.7988	55.9989	480.672	187.904	37.4394	30.6255	17.8417	12.4309	10.0062	1621.66	46.3032	31.8119	737.847	112.594	830.609	153.394	2016.76
451	9	wt9_72h_1	23.75	170.542	1.292	58.292	2.333	1.792	1.125	120.917	245.083	572.625	197.583	44.875	50.333	26.25	16.75	22	127.667	33.458	13.375	710.792	64.375	492.542	158.042	1383.75
452	9	wt9_72h_2	26.25	73.875	1.083	55.542	4.583	3.833	0.875	45.375	316.042	421	299.833	22.917	59.958	13.292	14.583	14.25	1031.67	45.542	22.042	526.583	11.833	550.875	152	1252.96
453	9	wt9_72h_3	18.375	122.208	0.5	54.792	1.667	1.792	1	65.375	157.708	394.708	162.833	22.792	124.542	19.583	7.75	18.125	798.292	24.25	13.292	511.333	38.104	340.042	208.125	1347.75
454	9	△slr1983_72h_1	74.4349	167.714	1.01708	69.2266	2.65278	2.36201	0.820217	58.9833	207.766	512.741	169.014	35.9741	50.1732	20.4658	14.0458	16.3517	532.777	30.8573	22.2369	412.519	29.1228	468.129	175.428	1345.5
455	9	△slr1983_72h_2	24.0747	122.577	0.846029	56.968	3.24503	2.90918	1.01868	74.5531	195.28	389.409	183.548	20.5626	64.5544	16.8078	9.32178	14.7054	522.298	25.0467	22.2369	450.542	26.2583	362.975	128.222	1231.6
456	9	△slr1983_72h_3	26.0399	125.009	0.876084	68.0498	2.62889	2.59239	1.00566	112.52	255.603	433.122	136.119	33.6548	64.9944	18.8637	11.9672	12.8687	622.812	17.6268	20.1651	524.094	45.5042	430.713	65.9056	1271.97
457	9	△slr1760_72h_1	24.1236	58.75	1.04414	33.9381	2.72813	2.50713	0.931686	62.7915	288.399	242.667	212.311	100.618	44.7745	20.951	13.369	7.74279	316.235	17.8017	10.7486	542.645	25.6481	286.616	119.375	624.184
458	9	△slr1760_72h_2	22.7481	78.604	0.977007	26.1796	2.87848	2.28328	0.948626	70.9759	163.079	246.29	132.505	95.3621	79.8254	18.9629	15.477	7.13753	220.244	16.3005	9.08072	371.003	37.9061	175.016	94.792	579.538
459	9	△slr1760_72h_3	21.3726	98.458	0.79055	40.1572	2.75986	2.76089	1.03791	54.026	255.74	399.259	162.173	138.503	78.0838	26.7916	12.827	8.34909	273.225	18.2206	11.1193	449.213	30.506	222.889	96.958	551.294
460	9	△sll5059_72h_1	39.8205	82.917	0.749898	69.2978	2.91813	2.49603	1.00256	82.85	192.652	524.507	182.455	42.2882	156.605	38.0249	13.0077	19.2926	629.009	33.3349	18.8101	658.089	68.9774	839.564	244.208	1487.66
461	9	△sll5059_72h_2	25.6875	165.292	0.798594	64.6182	2.82055	1.9176	1.06044	87.1434	247.34	623.844	262.831	59.2854	178.302	24.3061	17.2229	15.5728	801.153	39.8616	15.9991	642.422	55.1372	1338.97	390.708	1611.8
462	9	△sll5059_72h_3	31.1032	52.792	0.7012	40.5125	3.0157	3.07428	1.02225	86.1146	246.74	649.398	190.227	53.005	200.364	49.8302	24.2687	26.1706	736.186	38.2565	17.0807	611.911	88.1284	1307.49	518.875	1857.16
463	9	△slr1213_72h_1	17.382	226.81	1.01045	43.56	2.89915	3.10083	1.11329	94.8119	277.265	359.615	132.763	25.6993	51.2591	23.6914	11.386	25.7001	568.27	27.023	14.4323	500.251	60.4464	441.346	163.668	1287.9
464	9	△slr1213_72h_2	21.1022	168.904	0.541415	71.3962	3.6716	1.88548	0.99661	47.7483	215.385	353.562	181.269	26.3851	58.6879	30.8612	15.4361	23.6588	560.473	46.2634	16.4865	414.264	45.0013	382.952	123.112	1263.36
465	9	△slr1213_72h_3	19.9649	149.308	0.929381	53.4565	3.30906	2.97592	1.27775	64.4064	217.916	454.706	180.674	33.4706	78.623	18.392	12.0967	31.7268	551.898	39.2823	15.2345	472.798	38.1368	485.764	144.111	1310.45
466	10	wt10_72h_1	40.917	37.333	689.167	92.042	1037.92	42.917	717.708	236.167	639.75	76.542	612.458	146.833	216.167	104.5	100.875	95.792	3471.96	255	236.833	2534.96	920.458	13509.2	578.875	5984.67
467	10	wt10_72h_2	50.875	49.083	779.292	88.542	1059.12	70.167	852.208	318.667	723.833	70.667	762.042	196.583	221.667	106.917	124.958	121.5	3439.12	251.833	261.75	2297.71	769.833	18404.3	589.333	6257.17
468	10	wt10_72h_3	37	41.625	636.042	77.125	1146.79	41.375	857.208	226.292	606.083	84.167	681.958	162.708	222.417	100.792	124.125	109.292	3483.96	255.25	277.5	2341.42	840.333	15795.8	631.667	6089.38
469	10	△slr0947_72h_1	47.0757	52.1502	1107.15	94.1558	1188.11	44.8146	965.87	375.289	716.191	67.1343	734.539	179.221	254.763	122.346	143.056	129.685	3032.37	256.113	203.486	1930.32	938.629	15481.2	618.17	6927.4
470	10	△slr0947_72h_2	34.7152	58.5522	557.659	80.6655	1223.58	78.9424	1290.8	194.136	469.357	61.99	1242.58	169.76	271.351	101.076	118.828	117.669	2349.14	298.828	267.058	2173.55	618.754	13313.1	377.621	5855.1
471	10	△slr0947_72h_3	28.0536	33.6102	1129.23	82.2265	1263.24	53.2466	1390.1	267.7	573.644	64.4738	1184.25	174.258	275.7	129.76	137.291	114.203	3366.82	244.876	231.197	2377.14	947.495	13033.2	481.618	5847.71
472	10	△sll0396_72h_1	47.1502	47.594	702.754	55.4206	1288.39	61.1614	737.431	278.319	728.786	53.0761	554.329	180.481	196.594	115.752	164.62	90.5485	2920.58	263.233	275.602	2241.43	855.246	13789.4	713.241	6258.67
473	10	△sll0396_72h_2	51.7955	41.9001	735.999	68.2992	1218.71	47.9156	797.989	299.687	852.617	57.4786	469.122	181.41	245.016	99.4558	170.628	114.731	3970.05	252.221	250.131	2507.81	1019.61	14317.2	528.311	6076.32
474	10	△sll0396_72h_3	49.1218	39.7102	652.126	71.732	1034.14	60.4789	700.148	269.671	763.526	70.7005	641.971	193.149	283.681	115.317	158.406	98.6988	3225.99	237.014	220.204	2419.71	1108.45	18999.9	774.298	5190.47
475	10	△sll0797_72h_1	52.4923	33.8726	676.525	118.748	1041.11	40.7096	866.175	264.086	567.919	109.328	612.889	255.681	212.492	136.636	188.099	101.853	3063.58	213.07	242.174	2322.15	1639.53	18051.6	416.939	7094.38
476	10	△sll0797_72h_2	57.1377	57.815	661.325	99.7583	1062.46	80.4445	803.515	252.375	749.761	74.3547	727.171	209.04	233.81	95.547	96.1209	99.7491	3326.53	154.689	253.487	2449.32	1229.88	17814.6	659.102	7332.54
477	10	△sll0797_72h_3	35.9715	30.2215	569.051	111.412	820.361	62.9144	697.142	175.159	582.231	90.9843	764.511	158.428	208.155	123.72	133.616	104.348	3327.85	219.839	201.356	2435.95	842.884	16135.9	516.983	6846.07
478	10	△sll1330_72h_1	30.5821	49.2023	242.063	100.329	737.19	25.0283	1353.05	107.522	249.083	74.8419	658.731	148.881	233.81	69.1112	112.21	128.792	1494.32	199.784	261.079	1130.46	1536.16	14655.3	541.993	4697.93
479	10	△sll1330_72h_2	29.1105	58.8382	380.427	88.022	926.045	21.3283	1554.49	150.582	350.463	98.3217	628.358	196.451	200.202	81.7438	93.2207	72.6773	2005.86	224.253	253.853	1450.68	1496.99	13673.9	632.324	6613.55
480	10	△sll1330_72h_3	23.5751	32.9966	364.466	93.808	914.431	27.3657	1497.67	167.085	302.285	89.7633	719.316	163.836	222.969	93.5643	116.215	118.674	1755.09	252.922	209.768	1362.21	1688.88	14760.8	544.789	6432.99
481	11	wt11_72h_1	49.417	14.792	667.625	52.333	486.375	17.167	432.125	310.667	739	13.125	373.875	78.5	23.667	161.417	50.5	35.583	1955.92	63.25	144.417	1532.67	261.667	4198.25	154.458	3816.88
482	11	wt11_72h_2	44.083	11.083	598.292	47.042	466.458	30.583	359.167	307.042	716.167	12.917	338.958	88.625	18.292	168.167	60.125	34.917	2424.62	57.667	144.292	1677.29	323.708	4229.92	159.542	3651.29
483	11	wt11_72h_3	85.125	17.667	759.125	52.375	560.125	31.333	407.958	485.542	747.292	13.375	445.083	102.458	24.167	239.333	54.542	43.042	2355.83	80.75	164.333	1686.12	299.542	4284.46	195.75	4042.17
484	11	△sll1708_72h_1	45.7867	7.07764	765.929	63.1135	673.937	34.389	1291.96	484.947	683.988	33.7736	502.03	245.458	22.8281	338.053	81.3536	45.6752	1665.23	117.733	229.263	1215.27	287.044	7338.66	238.299	7377.79
485	11	△sll1708_72h_2	43.2999	8.3507	664.58	50.4445	714.834	23.9604	1204.72	432.901	667.297	15.4426	522.95	144.479	19.449	327.328	67.9923	42.5406	1372.38	95.5754	222.835	1112.88	419.489	6778.94	188.119	6270.31
486	11	△sll1708_72h_3	49.2353	5.75521	716.163	55.2236	631.764	19.491	1110.58	555.782	752.647	17.7619	454.887	104.018	20.3098	318.663	69.6321	47.267	1511.07	83.9767	188.498	1176.05	429.091	7062.14	162.239	6468.11
487	11	△slr0312_72h_1	68.2026	13.9453	716.196	50.6735	467.77	32.0647	375.718	389.103	714.895	12.2032	342.158	27.6639	16.1721	157.039	49.6865	33.6842	2855.5	83.9425	158.417	2106.29	431.012	4335.27	123.347	4042.02
488	11	△slr0312_72h_2	71.0584	14.793	776.935	55.8544	511.319	40.9046	430.948	376.952	637.808	13.8	354.724	16.0649	20.079	151.704	51.1116	41.9334	2826.55	67.3085	119.485	1960.44	453.822	4461.36	130.726	4036.86
489	11	△slr0312_72h_3	87.9135	15.394	499.019	59.0618	362.914	31.9722	371.27	200.891	535.354	13.2978	359.91	18.4554	23.2386	140.814	47.9756	36.434	2622.14	94.7581	159.532	1824.65	415.61	3999.85	143.879	4067.83
490	11	△sll0485_72h_1	54.9881	13.6769	413.793	62.0223	455.572	17.0208	446.33	292.288	459.25	17.676	375.269	101.956	18.5568	169.263	43.6266	57.9726	2269.36	64.5514	181.738	1407.22	239.957	4655.06	149.412	3840.63
491	11	△sll0485_72h_2	73.0742	11.4449	396.223	38.0174	429.936	19.465	390.082	273.798	421.278	13.946	357.019	105.521	14.7361	252.174	43.6985	54.1917	1658.03	57.7856	191.957	1300.77	241.302	4221.88	180.369	3337.57
492	11	△sll0485_72h_3	55.9396	13.7843	754.323	51.5617	642.431	29.0564	420.986	452.5	1160.4	16.5815	373.971	105.796	16.6892	314.19	67.7924	58.2036	2068.31	71.3595	206.452	1476.91	281.029	4355.16	179.166	3605.26
493	11	△sll0039_72h_1	37.7737	11.5499	273.722	62.2846	518.829	10.1113	359.683	391.912	529.744	12.5828	336.943	79.1618	24.325	253.926	87.7141	60.7783	2047.61	71.9339	134.972	1389.24	197.08	4404.73	181.785	3732.89
494	11	△sll0039_72h_2	45.9551	14.0756	500.172	55.0556	588.217	20.7742	481.025	411.117	812.08	14.467	353.721	91.4368	30.7716	227.509	116.394	71.3309	2805.19	74.6916	138.235	1932.48	296.342	4167.39	162.449	3577.32
495	11	△sll0039_72h_3	34.8577	13.6809	416.228	53.6659	471.723	15.7185	356.471	366.212	645.689	15.0571	377.779	86.1304	25.6093	212.962	96.0864	63.925	2173.38	73.2012	134.595	1406.37	268.133	4189.72	152.267	3202.18
496	1	wt1_72h_1	79	47.458	593.875	58.75	874.75	68.625	699.75	71.917	183.5	128.333	1514.92	174.417	31.458	153.375	140.667	132.5	1189.08	869.292	91.083	651.792	640.167	18222.2	432.167	6132.75
497	1	wt1_72h_2	71.583	43.5	728.833	33.958	871.333	39.917	737.375	80.5	249.333	143.167	1297.08	199.5	33	184.708	184.958	104.333	1367.75	823.208	90.917	988.958	705.917	17612.6	452.292	6727.75
498	1	wt1_72h_3	51.292	53.458	607.292	42.75	733.667	35.5	629.75	69.375	246.583	129.958	1335.88	185.333	38.5	173.042	132.625	124.167	1244.17	833.833	118.542	782.417	747	17598.5	517.125	6381
499	1	MT-△sll0649_72h_1	57.292	58.708	550.125	57.4802	920.345	72.626	788.473	96.2639	176.681	186.75	1672.49	155.576	34.333	161.085	91.6724	95.6311	1368.54	722.333	124.091	754.5	1929.25	18825.1	402.292	6338.42
500	1	MT-△sll0649_72h_2	67.25	48.958	587.042	35.6441	1089.98	67.4481	779.4	95.3108	215.795	132.042	1318.71	181.887	39.5	176.223	122.649	76.929	1357.54	797.667	127.261	780.667	1907.04	19041.7	503.583	6166.62
501	1	MT-△sll0649_72h_3	65.75	43.708	736.917	41.9059	1056.94	50.3198	736.163	108.69	239.445	172.958	1512.3	179.004	31.042	193.683	117.825	108.689	1355.04	725.833	117.976	855.167	1788.08	17516.8	471.167	6179.54
502	1	MT-△slr1584_72h_1	67.3771	28.5599	595.32	34.2758	546.289	51.0758	731.844	59.0005	147.389	86.2274	892.402	179.489	44.4182	181.766	185.114	109.192	1136.82	831.542	100.221	562.048	368.084	15764	443.629	6278.38
503	1	MT-△slr1584_72h_2	64.0937	22.4537	557.595	33.2735	704.844	52.3368	751.856	68.1279	190.984	127.196	1066.49	177.829	48.0291	182.414	179.85	89.1906	1244.98	896.614	100.141	652.19	525.852	16630.5	509.226	6274.44
504	1	MT-△slr1584_72h_3	72.3551	28.6894	607.808	33.3116	662.371	59.207	780.32	74.3669	178.612	107.754	966.848	172.545	52.129	165.916	176.607	112.504	1358.51	879.182	113.016	559.248	490.099	16113.3	530.093	6392.7
505	1	MT-△sll0789_72h_1	38.6233	54.0397	392.491	67.1454	823.166	55.1746	630.261	64.5264	189.255	101.097	1909.76	183.943	27.5492	194.117	108.58	161.776	1218.83	839.295	75.9796	742.537	614.712	16746.1	538.136	7195.06
506	1	MT-△sll0789_72h_2	39.4194	51.2446	404.153	52.5482	886.558	44.876	605.359	70.9512	222.513	107.89	1683.31	190.622	26.3426	152.221	117.785	179.609	1260.19	906.889	83.1552	623.478	391.974	17104.1	520.334	8139.62
507	1	MT-△sll0789_72h_3	56.1428	62.4251	478.696	54.8841	795.199	45.6104	648.048	77.2362	228.056	103.095	1689.59	177.079	27.7504	132.668	128.827	174.513	1289.18	828.027	109.327	721.256	860.379	17631.2	570.506	7273.01
508	1	MT-△slr0081_72h_1	51.8425	48.2617	422.359	29.8362	780.468	48.7744	1068.12	77.7108	250.664	98.4345	1035.27	204.545	32.1543	134.206	82.8163	119.101	1182.85	672.844	43.9841	851.876	572.895	20034.1	332.593	6365.91
509	1	MT-△slr0081_72h_2	35.0273	23.2934	378.292	29.5433	860.454	44.6182	1188.19	74.0236	258.938	94.4385	938.523	197.579	38.006	111.72	114.101	101.905	1486.46	839.295	62.8939	1069.81	385.423	16417.9	492.82	6155.34
510	1	MT-△slr0081_72h_3	19.5109	39.1317	580.622	30.1276	895.881	40.7551	1016.84	108.941	305.262	106.557	925.945	193.961	36.1962	108.928	101.221	112.097	1196.01	892.802	52.7633	859.871	482.6	16947.5	333.403	5887.05
511	2	wt2_72h_1	97.083	10	540.417	33.625	297.5	22.083	527.5	237.917	177.5	43.333	456.25	847.917	75	50.833	75	37.083	1115.83	126.667	130.833	631.667	226.667	3017.5	254.167	2749.17
512	2	wt2_72h_2	82.5	17.917	796.667	26.792	352.083	20.417	512.5	194.583	246.667	50.833	502.5	824.583	69.583	40	63.75	28.75	1308.33	159.167	110.417	526.25	295.417	3017.92	217.917	2643.33
513	2	wt2_72h_3	51.667	36.667	648.75	33.25	258.75	27.083	412.5	169.167	200.833	40.417	435	839.583	68.75	61.667	55	36.25	907.5	147.917	80.417	397.5	276.667	3118.75	249.583	2526.67
514	2	MT-△slr0115_72h_1	75.2211	19.4827	799.331	29.4842	302.505	14.8383	557.953	133.691	128.811	36.4302	318.144	665.41	58.2826	52.256	71.6068	23.9479	699.988	157.798	94.6833	366.903	234.876	2835.14	202.118	2757.49
515	2	MT-△slr0115_72h_2	47.4655	30.5877	1063	34.2137	247.422	8.07486	425.7	262.466	255.05	52.9693	248.082	826.529	50.5522	47.2676	51.9331	20.3505	832.513	122.804	61.8849	517.886	341.082	2717.31	207.781	2539.94
516	2	MT-△slr0115_72h_3	62.3394	16.5604	817.797	24.724	290.461	12.5275	486.699	179.856	168.824	42.1585	235.16	691.024	47.1238	43.6888	62.132	24.4114	794.779	152.849	67.9845	440.974	295.291	2678.02	255.488	2701.64
517	2	MT-△slr1837_72h_1	138.271	17.7366	793.204	28.7225	302.388	23.7549	462.482	339.096	249.149	49.3195	692.671	1409.69	153.666	48.6122	77.5773	43.9591	1224.78	138.806	93.8195	636.253	367.965	5828.44	171.468	3291.1
518	2	MT-△slr1837_72h_2	43.6084	25.5113	647.514	26.7839	235.191	21.5953	555.067	253.301	223.541	44.576	439.282	722.12	96.811	30.6225	61.1845	42.6203	885.631	141.828	109.951	596.583	426.675	4174.02	345.448	3264.32
519	2	MT-△slr1837_72h_3	77.9101	24.6863	775.259	33.3479	331.552	24.6187	479.134	256.756	203.921	45.3844	400.953	1080.31	122.556	33.2789	84.3431	43.2897	1226.45	114.229	119.63	625.714	425.225	5183.39	246.944	3268.97
520	2	MT-△slr6040_72h_1	69.6239	16.7102	355.749	17.2755	325.848	43.9575	533.835	354.352	191.373	47.1928	311.542	8682.53	126.396	671.077	316.52	288.143	1065.21	751.125	213.771	167.051	290.228	3770.69	629.29	3636.38
521	2	MT-△slr6040_72h_2	86.6687	16.6336	386.151	19.7983	320.004	37.7098	594.265	372.191	134.446	56.5988	176.802	5351.59	79.552	452.978	365.026	128.921	759.894	382.656	183.173	147.712	281.975	2903	422.146	4683.82
522	2	MT-△slr6040_72h_3	103.664	25.2534	416.554	50.6437	314.161	31.4621	654.695	537.179	225.284	45.7127	231.365	9051.77	116.848	734.806	650.853	322.627	770.761	661.638	167.572	131.708	520.494	3231.01	389.755	3284.43
523	2	MT-△sll1592_72h_1	67.0605	25.7516	754.848	20.0954	381.288	13.7902	437.021	262.002	133.5	55.216	269.906	789.675	72.4343	43.562	44.0448	55.7691	1053	151.275	212.406	560.106	1517.01	2948.83	287.804	2377.04
524	2	MT-△sll1592_72h_2	75.4124	21.5031	672.405	29.8655	416.999	14.8891	516.512	245.914	178.892	47.1425	320.527	913.821	66.9103	47.0264	62.9836	47.2246	1099.56	140.179	138.021	487.492	2108.31	3329.3	220.825	2570.46
525	2	MT-△sll1592_72h_3	77.1307	19.2299	772.898	30.7537	425.141	24.2852	730.353	302.987	172.268	40.6614	388.535	671.901	59.0531	40.8487	57.2348	44.5178	1172.31	146.754	149.63	589.58	2082.74	3283.75	234.019	2313.56
526	3	wt3_72h_1	42.25	60.833	122.083	269.583	104	13.75	237.458	936.208	185.292	939.125	214.708	336.125	24.75	64.208	23.792	24.208	842	57	34.792	321.875	99.792	2312	175.958	3514.29
527	3	wt3_72h_2	51.083	87.375	67.292	251.875	189.292	19.208	180.75	956.583	103.167	870.583	274.208	337.708	29.333	51.25	36.208	19.917	1046.54	83.792	38.25	359.833	124	2017.38	178.083	3545.33
528	3	wt3_72h_3	63.75	93.833	73.458	215.833	109.625	10.333	197	1021.12	67.625	838.708	217	329.042	31.458	65.458	23.125	21.75	810.958	59.5	40.667	171.417	63.625	2278.58	184	3321
529	3	MT-△slr1783_72h_1	103.577	58.4251	108.211	259.312	131.055	14.8169	210.692	1016.5	125.674	745.651	238.776	331.614	38.717	76.6415	35.4885	19.4579	927.526	68.0945	36.6613	203.485	75.1719	2366.13	159.411	3591.08
530	3	MT-△slr1783_72h_2	91.4394	45.6467	76.7673	254.373	123.055	15.4589	231.54	992.216	116.766	844.363	213.534	342.442	40.1715	75.0359	31.9593	17.9995	1017.17	79.8904	34.3389	239.65	69.2774	2034.1	177.437	3616.59
531	3	MT-△slr1783_72h_3	86.5281	63.9482	90.1833	281.126	142.094	13.3321	227.791	1019.04	120.486	720.163	199.771	339.285	41.2037	79.8738	29.6831	19.1679	1045.35	80.486	38.5615	183.701	81.1305	2126.94	158.851	3432.11
532	3	MT-△slr1909_72h_1	94.3537	86.7995	109.155	257.047	123.431	17.3071	138.373	894.571	84.3966	999.326	202.413	363.557	15.5831	61.0214	27.4668	19.2646	796.911	82.6548	34.5199	274.112	84.9669	2631.84	189.125	4071.94
533	3	MT-△slr1909_72h_2	94.4342	94.1627	117.919	210.64	124.134	16.7735	171.954	807.029	148.522	1019.55	215.603	385.034	11.5884	67.8615	33.775	19.9091	886.375	69.3693	42.1809	246.918	99.4791	2527.51	179.965	3840.55
534	3	MT-△slr1909_72h_3	89.6426	76.1861	114.962	217.741	126.154	15.2577	186.952	861.674	118.848	954.009	229.154	333.147	14.952	63.7742	29.1205	18.7488	784.792	76.9355	35.0528	272.064	114.744	2540.83	180.677	3951.77
535	3	MT-△sll1544_72h_1	45.8003	95.5534	55.1205	294.837	107.13	8.70284	161.826	730.268	70.9168	1019.55	154.469	345.042	42.7994	41.9628	19.8954	18.7223	726.409	70.1634	47.071	271.575	68.928	2339.74	213.954	3719.28
536	3	MT-△sll1544_72h_2	55.341	61.1585	69.1556	218.753	111.667	11.3109	162.663	694.867	90.9152	1215.53	181.002	317.158	48.6472	45.1184	20.3287	21.7428	741.384	63.3646	39.5297	278.254	63.2185	2528.99	163.644	3484.24
537	3	MT-△sll1544_72h_3	41.03	87.2798	55.4752	205.057	100.085	13.3674	124.645	766.803	51.7122	1010.37	163.078	323.986	41.3527	41.7486	20.0967	23.7323	566.885	65.5859	47.7732	229.8	75.2731	2240.39	186.175	3327.46
538	3	MT-△sll0921_72h_1	32.4358	58.9572	75.7738	154.761	129.2	10.209	217.336	884.739	115.923	948.733	107.795	338.763	14.084	52.7029	23.009	19.912	724.918	64.0846	31.4563	253.824	78.9913	2141.39	155.258	3352.78
539	3	MT-△sll0921_72h_2	39.8683	79.039	72.117	166.096	131.896	12.8823	250.505	752.973	99.1048	984.93	145.807	327.437	14.03	62.2624	23.153	26.5351	692.595	75.0681	47.804	233.434	73.1454	2444.89	170.527	3561.9
540	3	MT-△sll0921_72h_3	27.8144	99.8479	79.8472	198.313	128.963	12.5027	250.339	921.956	115.039	789.19	127.533	346.679	13.0328	68.5611	25.868	26.2931	654.324	64.4426	41.7499	226.551	65.9575	2202.65	199.936	3479.46
541	4	wt4_72h_1	108.458	9.542	683.75	115	1095.04	91.292	1486.71	185.75	584.792	17.167	1604.58	128.625	403.667	148.292	93.667	47.417	3009.83	118.167	374.375	1574.83	239.708	9364.75	149.583	6794.79
542	4	wt4_72h_2	145.375	20.208	959.75	161.042	1425.88	50.833	1224.12	316.958	857.958	9.583	1953.67	129.042	453.958	217.792	126	62.125	3101.12	72.875	401.833	2069.67	405.875	7749.62	322.542	6435.04
543	4	wt4_72h_3	168.667	15.5	900.375	131.417	1527.83	81.208	1388.17	284.625	826.542	18.125	1365	122.375	476.833	215.333	137.042	83.167	3343.79	162.125	558.708	1842.5	585.625	8568.88	203.125	6348.29
544	4	MT-△slr0474_72h_1	125.724	17.9474	931.181	105.012	535.335	75.6741	735.456	256.034	767.446	10.3034	1226.9	191.924	493.746	222.005	170.528	64.09	2348.27	85.8351	223.072	1661.53	424.266	8578.79	229.721	5578.71
545	4	MT-△slr0474_72h_2	104.276	14.0603	859.848	118.51	826.513	77.7878	1228.09	267.336	683.499	12.1659	1478.04	120.838	400.433	188.133	114.025	71.405	2713.86	95.199	338.167	1589.33	342.876	8163.24	227.995	6195.04
546	4	MT-△slr0474_72h_3	78.2076	14.4342	871.634	111.628	764.564	65.6564	1105.52	269.355	857.342	12.0501	1231.29	129.586	330.861	177.381	146.547	51.9463	3266.88	142.845	371.118	2086.05	410.344	9207.79	269.097	6497.04
547	4	MT-△sll1292_72h_1	95.0296	10.8899	758.898	111.606	1395.38	66.7132	2277.87	188.426	1112.5	14.8105	839.409	126.823	359.712	126.492	66.6686	39.799	3285.55	93.822	250.45	2109.72	771.781	7897.16	236.047	5952.22
548	4	MT-△sll1292_72h_2	150.766	15.8053	385.655	135.989	1358.57	61.7012	1939.91	212.928	1049.04	13.7572	769.041	124.06	311.355	139.976	55.6929	36.2872	2491.66	107.317	281.891	2308.05	769.995	7038.68	201.691	5975.56
549	4	MT-△sll1292_72h_3	176.063	14.5121	691.066	131.786	1023.67	37.1789	1550.88	198.858	1060.28	15.1988	697.427	226.282	330.006	150.251	61.5857	32.9229	3028.75	109.705	323.967	2407.51	567.946	7912.38	257.592	5484.01
550	4	MT-△slr1037_72h_1	118.47	17.031	834.972	103.155	1271.4	102.1	1468.38	223.199	688.345	13.0151	1480.36	160.733	404.275	169.133	133.381	71.8439	2806.4	135.386	394.174	1666.76	270.76	8540.78	238.683	6340.63
551	4	MT-△slr1037_72h_2	137.54	15.0318	740.555	119.788	1265.77	109.303	1329.36	218.839	712.369	13.6478	2015.45	177.002	425.185	210.743	120.218	59.089	3398.78	107.437	471.836	1569.7	360.483	5841.68	213.745	6214.07
552	4	MT-△slr1037_72h_3	155.547	15.1742	900.713	134.394	1457.33	81.4835	1252.21	252.719	803.951	14.7694	1441.19	157.887	465.267	198.94	107.844	79.2029	3027.24	133.286	431.294	1725.76	454.402	7655.76	180.649	5992.6
553	4	MT-△slr1042_72h_1	283.716	12.2867	830.589	103.715	1373.01	76.2434	1226.82	300.006	772.308	15.9821	2186.41	106.924	447.054	220.711	110.19	84.6678	2969.42	164.035	482.053	1612.19	455.837	10591.4	207.519	5800.39
554	4	MT-△slr1042_72h_2	222.34	9.26539	1005.45	179.392	1322.69	100.882	1436.09	267.929	801.06	13.8722	2038.45	96.7538	369.049	317.198	78.4307	53.9195	3198.25	179.451	389.351	2124.19	357.52	7315.36	135.628	6615.31
555	4	MT-△slr1042_72h_3	351.293	12.6371	869.825	118.14	973.444	69.3122	1425.44	341.129	1252.52	15.6237	3646.88	213.12	460.481	340.614	159.316	64.4486	3381.9	203.238	525.314	2002.09	397.365	12524	203.173	7100.76
556	5	wt5_72h_1	59.958	73.25	432.667	90.792	178.042	21.542	188.083	30.625	242.917	140.542	448.917	84.417	51.875	54.083	24.042	10.792	672.917	57.458	34.833	218.292	167.875	1518.04	192.458	1550.96
557	5	wt5_72h_2	46.208	114.292	206.542	102.583	134.625	12.542	182.292	63.792	218.5	154.125	407.917	94.5	59.333	58.375	24.792	23.25	714.667	48.583	53.917	291.542	56.667	1752.79	87.5	1565.54
558	5	wt5_72h_3	37.042	110.292	236.167	81.375	137.25	13.375	181.792	29.458	176.917	160.458	456.958	83.875	48.333	69.75	32.792	13.792	563.25	46.125	69	125.5	140.208	2083.17	74.875	1969.04
559	5	MT-△slr2024_72h_1	46.1073	107.674	334.994	74.574	149.779	19.6387	199.023	29.99	207.427	170.611	517.69	70.3198	45.8279	63.8067	23.1268	13.1743	795.934	57.9547	41.386	240.078	105.917	1449.66	142.162	1696.81
560	5	MT-△slr2024_72h_2	52.3094	100.411	337.887	84.1513	133.818	14.0731	174.124	45.5799	164.039	137.832	421.793	79.3608	63.375	52.5451	21.2153	12.4389	552.557	45.3831	44.4271	200.463	137.118	1440.35	118.087	1669.37
561	5	MT-△slr2024_72h_3	49.7854	102.832	305.681	79.3626	152.575	17.3489	182.902	28.5987	153.306	157.635	443.357	142.197	47.1299	78.6666	25.2149	16.4152	694.145	52.7235	62.0775	180.899	97.9728	1201.39	109.714	1532.99
562	5	MT-△slr1982_72h_1	127.869	101.375	726.135	136.354	286.707	16.4395	215.091	547.605	437.259	170.127	433.437	1476.06	63.4212	128.527	59.2851	23.6639	1486.67	135.912	66.6781	133.604	228.541	1848.08	105.443	2634.58
563	5	MT-△slr1982_72h_2	136.541	104.374	494.461	100.837	308.743	25.2226	203.323	353.489	535.932	113.354	517.001	1319.16	39.6889	187.733	50.2513	17.4435	1421.6	180.183	111.444	109.239	127.438	2258.43	91.0572	2363.85
564	5	MT-△slr1982_72h_3	80.7087	158.355	446.005	163.452	275.915	14.3629	202.417	354.082	485.608	164.163	501.496	1495.75	52.3291	221.88	73.977	32.5203	1267.76	191.286	52.1696	111.616	154.447	1967.62	103.583	1985.26
565	5	MT-△sll0038_72h_1	46.8871	106.741	246.526	140.078	189.494	10.8007	435.993	47.5583	356.577	144.338	545.122	95.1952	29.5724	69.0185	29.893	23.4079	663.464	48.7184	60.422	194.757	415.722	1529.3	115.451	1736.73
566	5	MT-△sll0038_72h_2	37.3126	123.931	287.432	132.869	198.433	10.7161	441.097	71.9076	307.36	206.842	475.34	90.4425	32.375	44.9901	28.9638	14.3807	741.298	44.2285	53.1692	221.737	372.901	1703.76	111.315	1857.14
567	5	MT-△sll0038_72h_3	51.6556	106.608	287.466	122.401	174.181	10.6312	482.362	54.8072	374.778	195.51	468.198	95.2899	30.9885	66.9598	27.9006	17.7506	771.08	49.7413	55.9099	223.395	406.849	1599.28	130.617	1785.86
568	5	MT-△sll1291_72h_1	54.6285	104.542	246.68	100.366	99.8645	15.0724	277.99	32.05	225.917	116.57	245.282	521.097	35.7027	31.6422	13.9532	13.2567	596.406	40.4641	68.6595	193.809	86.2962	2349.01	94.1423	979.651
569	5	MT-△sll1291_72h_2	39.1317	87.6222	273.417	93.6671	101.687	20.1154	322.141	33.598	263.106	132.481	303.202	540.258	45.1352	34.0568	15.6275	14.6732	700.474	40.504	53.2625	227.353	80.0562	2079.71	95.2417	991.694
570	5	MT-△sll1291_72h_3	32.3851	97.2103	409.634	103.679	177.173	15.8013	308.734	35.479	372.16	140.085	220.579	586.617	46.5544	40.3459	22.1855	13.9837	732.252	48.0586	25.8217	279.803	135.367	2706.22	85.0196	942.949
571	6	wt6_72h_1	45.542	56.208	55.458	74.208	30.375	8.125	74.417	14.958	44.417	164.958	257.083	39.708	57.583	83.583	66.458	121	1267.54	19.042	21.375	220.458	19.958	878.125	46.667	639.042
572	6	wt6_72h_2	69.75	200.625	53.5	254.667	19.958	5.167	51.125	49.042	71.333	268.125	220.25	45.417	194.125	53.792	22.708	55.5	1081.71	25.333	17.583	218.5	31.5	634.875	40	954.125
573	6	wt6_72h_3	77.625	196.583	54.479	250.625	25.167	0.875	24	41.833	27.833	302.458	13.958	47.333	56	5.208	4.708	35.208	1027.04	5.208	13.458	4.208	7	638.292	61.417	1122.79
574	6	MT-△slr1214_72h_1	63.104	144.982	47.875	164.768	30.0179	8.83771	15.8824	34.5744	29.4485	277.373	184.917	34.5961	729.049	53.6135	28.6587	64.7748	1276.83	15.9391	16.2011	144.078	24.1234	614.137	36.7423	800.645
575	6	MT-△slr1214_72h_2	65.9561	138.633	55.125	239.241	14.9847	8.80573	27.8759	45.6444	27.3678	272.605	164.717	37.115	357.089	66.2263	33.6805	61.053	1126.5	15.602	22.324	128.053	27.7884	669.675	53.0132	834.34
576	6	MT-△slr1214_72h_3	79.6626	167.138	76.167	190.453	17.5782	6.82343	28.1351	39.8008	35.5997	265.966	246.296	54.3545	308.417	65.6981	38.2733	58.0875	1162.38	15.9653	18.44	136.627	29.4963	704.035	63.9051	764.399
577	6	MT-△slr1594_72h_1	56.409	129.587	48.25	238.876	48.4606	1.68987	43.5683	60.3834	61.2282	220.96	113.363	470.52	45.2305	65.6981	38.2733	97.1615	1114.71	72.7911	41.0445	74.3603	36.0075	564.616	62.0352	801.771
578	6	MT-△slr1594_72h_2	94.0422	123.578	63.708	184.163	53.3111	5.45874	76.2833	152.679	84.3817	261.711	96.023	245.972	41.7893	89.5496	51.928	61.4605	1104.62	82.8637	29.4974	69.7549	38.9603	578.764	62.8226	775.918
579	6	MT-△slr1594_72h_3	57.9938	162.461	55.708	235.633	40.4876	3.11928	52.2092	61.4547	57.2648	248.506	75.1546	548.08	40.1719	73.6668	76.4848	90.6487	1280.75	84.3951	38.2102	78.1794	27.1121	738.121	106.027	999.625
580	6	MT-△slr1041_72h_1	47.4642	166.779	75.2014	211.21	33.9607	4.63619	40.224	15.3724	49.0699	235.096	233.082	39.9463	86.8462	79.7724	35.2308	85.1582	1080.12	14.1911	13.9494	128.093	21.1712	763.137	46.9129	1071.12
581	6	MT-△slr1041_72h_2	54.8098	156.208	36.4958	164.711	22.7473	4.077	57.8295	17.606	35.8155	216.815	226.655	68.2144	101.501	93.6666	39.9929	156.692	1102.35	14.9464	26.2745	184.25	14.6741	950.818	49.6672	999.687
582	6	MT-△slr1041_72h_3	49.7718	94.7931	44.0911	182.409	23.8845	4.53938	54.6065	7.70827	33.5144	322.223	268.308	34.0954	167.491	111.953	95.6381	76.6436	1400.74	18.2722	16.7083	204.944	15.0335	886.834	61.5848	1356.15
583	6	MT-△slr1693_72h_1	59.6127	169.623	62.0083	224.076	22.9954	5.3647	45.7198	28.949	43.8411	275.939	168.877	52.7975	113.256	54.481	41.8882	101.341	1168.32	20.3262	13.0817	122.793	19.206	589.422	54.4737	770.833
584	6	MT-△slr1693_72h_2	57.2587	116.249	69.8685	189.929	31.1665	4.75469	52.827	46.3514	43.6664	284.694	148.207	46.0562	89.0143	38.9548	43.52	127.901	936.582	24.9637	13.4379	107.357	25.6133	606.555	52.6017	907.933
585	6	MT-△slr1693_72h_3	57.4938	149.197	42.5826	179.771	25.7352	4.93747	48.4284	36.5259	35.4953	226.246	182.179	33.9918	88.987	38.5423	20.68	63.698	1142.41	13.8823	19.4448	158.68	26.96	557.393	44.7168	886.852
586	7	wt7_72h_1	30.167	72.292	134.417	58.375	161.917	9.25	225.417	61.25	77.875	414.542	293.542	40.25	17.792	37.542	26.875	13.625	1012.96	38.708	15.917	275.042	296.083	860.583	130.125	1756.21
587	7	wt7_72h_2	35.083	75.875	121.542	40.208	137.333	5.875	200.042	46.333	37.25	406.292	316.625	39.292	19.958	39.083	16.458	11.375	949.333	46.042	44	279.667	219.5	887.625	99.333	1817
588	7	wt7_72h_3	45.458	50.875	108.667	70.167	110.875	8.75	161.583	53.792	55.625	446.542	303.917	35.333	22.125	30.292	15.375	16.792	1160.08	31.167	18.25	258.083	107.875	1119.96	103.292	2103.5
589	7	MT-△slr1305_72h_1	42.8437	50.593	117.157	48.6722	136.749	10.7145	111.849	46.6942	61.5218	468.277	293.242	37.2953	23.4556	44.6	15.9659	11.0097	1299.89	42.2874	14.4656	342.288	225.236	895.634	98.258	1710.83
590	7	MT-△slr1305_72h_2	50.0414	37.0406	97.4067	40.4713	125.024	9.02227	118.806	52.0367	77.4439	407.772	190.359	35.1431	22.9229	40.0171	24.5213	16.0448	1224.32	37.4964	19.713	365.069	267.198	856.317	115.727	1849.72
591	7	MT-△slr1305_72h_3	49.2643	46.975	95.0138	50.738	140.354	7.85934	115.166	62.7724	84.4159	383.173	254.91	30.387	24.4006	52.4723	22.1191	14.334	1385.67	37.0031	20.3282	367.039	211.646	973.871	82.668	1738.39
592	7	MT-△sll1879_72h_1	43.8902	143.823	126.46	65.8996	202.596	9.51102	405.844	82.3134	111.943	660.184	288.614	39.4032	22.5702	40.6053	28.057	17.9908	1465.52	43.291	39.7421	398.775	306.362	881.137	101.823	1605.7
593	7	MT-△sll1879_72h_2	28.1683	210.596	71.7563	90.1942	168.367	6.82833	352.124	63.8184	67.1656	609.725	261.444	37.0024	24.3244	36.2235	40.0816	13.862	1070.34	56.2138	38.5345	292.86	251.393	868.858	118.345	1724.28
594	7	MT-△sll1879_72h_3	29.915	104.014	91.0127	72.5908	163.279	9.12326	337.81	72.1512	83.5839	587.432	260.889	37.0976	24.6752	35.9311	34.8949	14.3044	1308.54	43.0326	29.9713	313.117	281.32	828.952	109.892	1585.69
595	7	MT-△slr2100_72h_1	31.6312	78.2604	128.404	58.1531	159.989	9.07684	235.736	45.2828	78.2623	407.059	386.608	37.2703	18.7662	36.1609	10.7043	13.9309	1140.14	46.0415	45.3025	297.336	209.054	845.361	99.7246	1768.69
596	7	MT-△slr2100_72h_2	41.5243	49.3754	123.794	53.947	108.013	4.53808	224.033	44.7031	57.0245	383.232	340.212	31.9726	15.5304	25.0027	20.3385	12.9789	960.282	36.8212	22.4136	210.221	156.09	796.332	122.865	1683.18
597	7	MT-△slr2100_72h_3	33.2795	53.2471	124.936	59.9126	101.221	8.99228	197.158	43.3924	52.5481	391.506	192.375	46.4196	18.461	27.0984	16.6253	10.6302	818.161	36.2181	32.0622	219.718	270.334	975.069	151.314	1962.92
598	7	MT-△sll1624_72h_1	36.333	181.029	126.718	36.541	164.492	8.53889	106.096	52.559	52.4152	394.982	358.562	40.378	65.8938	53.8208	30.3635	11.6745	1051.57	36.8333	29.4386	378.714	233.715	917.691	138.78	1735.86
599	7	MT-△sll1624_72h_2	38.8346	161.817	138.067	44.7885	128.334	10.619	101.407	48.414	66.6024	517.138	334.483	31.7761	52.4602	35.5548	22.4634	11.7108	1018.2	45.5479	27.8878	315.189	252.873	931.273	134.202	1709.03
600	7	MT-△sll1624_72h_3	34.748	121.288	108.707	35.7492	136.813	11.8529	99.3667	43.0944	49.099	382.766	343.01	32.0405	45.2718	45.558	21.7831	13.7348	1125.62	41.5014	22.3862	301.415	244.539	1008.14	147.668	1822.62
601	8	wt8_72h_1	39	88	3.583	51.167	2.167	1.833	1.958	48.875	89.917	424.25	249.042	21.5	38.583	18.083	13.625	7.208	720.208	32.25	19.292	253.542	25.667	520.208	25.708	1281
602	8	wt8_72h_2	41.542	71.208	1.833	18.958	1.25	2.292	2.417	58.25	156.625	412.792	232.5	35.625	19.458	23.208	21.375	10.833	408.667	28.167	18	264.875	32.708	554.708	56.625	1414.54
603	8	wt8_72h_3	28.167	56.083	3.708	39.375	3.292	4.958	2.167	12.417	74.458	362.833	205.083	41.875	18.25	24.583	29.708	4.083	549.875	29.292	14.708	168	39.375	554.125	23.042	1276.04
604	8	MT-△slr0687_72h_1	48.3084	63.3625	3.58148	40.9373	2.17969	4.22325	2.12523	41.6541	129.964	318.452	248.836	29.8316	27.6753	22.5737	17.4037	5.89708	645.984	23.4326	20.8913	228.511	18.0098	520.036	24.2097	1281.68
605	8	MT-△slr0687_72h_2	47.1263	53.8793	3.10796	29.6581	1.94231	3.54625	2.02462	33.743	118.046	338.992	257.003	39.5801	25.2446	28.0246	22.3122	5.35733	523.864	27.0029	17.3334	274.083	18.06	506.65	34.2702	1365.62
606	8	MT-△slr0687_72h_3	38.3158	72.6763	4.02331	36.0643	2.22463	3.34426	2.02274	47.882	137.175	340.31	219.308	35.5635	28.1138	25.9054	17.3775	7.169	748.788	29.4243	17.3142	251.764	31.0407	533.806	37.1935	1159.39
607	8	MT-△slr1588_72h_1	29.3983	50.4593	5.39182	26.9498	1.77968	2.66635	2.64159	37.4398	121.528	409.513	178.364	22.6433	18.9409	6.19227	13.0431	8.30036	589.368	40.487	19.4742	252.855	13.0894	491.171	48.5086	1257.32
608	8	MT-△slr1588_72h_2	29.2418	50.4593	3.74033	41.0281	2.68022	4.45825	3.00374	26.035	101.28	485.563	195.956	34.8048	15.4288	8.21618	10.8063	4.95831	627.053	41.4733	15.7943	216.666	13.9219	520.739	31.0706	1211.18
609	8	MT-△slr1588_72h_3	45.1579	52.1612	4.40789	39.3145	1.23763	3.54131	2.098	32.0124	105.37	397.904	213.237	33.3572	12.5189	13.0674	12.1992	9.31507	536.953	28.6972	18.1553	202.341	18.444	476.005	53.0377	1232.58
610	8	MT-△sll1673_72h_1	45.9034	54.993	6.55469	21.0911	2.39327	2.37937	2.13926	45.8086	233.896	385.481	222.657	29.6281	24.6881	38.1843	43.4022	7.33323	500.107	27.9529	15.0528	215.009	36.1394	559.9	34.5741	1450.28
611	8	MT-△sll1673_72h_2	36.988	43.5991	3.57321	52.6953	2.43842	2.51047	2.48072	43.8793	103.386	378.814	216.115	20.9697	30.694	22.1794	25.8955	5.32169	509.729	30.2066	16.5974	191.007	70.6847	499.312	36.8159	1380.43
612	8	MT-△sll1673_72h_3	46.1161	60.5769	3.38853	45.7015	2.62814	3.15865	2.56706	49.9141	184.238	395.934	246.851	35.1249	30.3363	49.4665	49.9979	9.02397	572.321	33.611	14.4568	410.246	37.1455	440.189	34.3948	1360.17
613	8	MT-△slr2041_72h_1	44.2056	104.402	3.07162	35.3852	2.20947	3.04841	2.25614	33.4658	162.942	423.311	186.883	28.4863	32.3512	22.7041	20.8805	5.07265	549.71	26.2268	16.0237	192.825	59.0694	476.713	39.6213	1316
614	8	MT-△slr2041_72h_2	35.9271	98.1414	3.43803	37.4619	2.17238	3.64843	2.38588	54.317	113.382	417.749	154.364	36.969	28.294	28.4067	23.2818	5.7668	512.234	34.1145	17.1933	189.535	36.1394	502.793	26.6065	1226.11
615	8	MT-△slr2041_72h_3	43.7541	64.4119	3.45648	35.9097	2.37822	1.62757	2.63182	40.8369	105.274	449.82	175.646	47.1204	36.4084	26.4651	24.7706	8.5434	652.725	37.111	13.265	251.261	29.2473	669.319	38.0202	1534.81
616	9	wt9_72h_1	51.583	101.167	334.667	89.458	235.208	9.083	254.167	48.208	150.458	733.625	501.417	71.208	128.375	38.583	28.792	15.833	1503.21	52.625	60.958	268.167	228.292	1668	550.292	2519.62
617	9	wt9_72h_2	54.875	102.167	424.958	20.25	185.875	25.042	206.667	45.417	168.75	768.833	644.542	52.375	163	45	41.875	21.625	1494.79	59.667	34.583	239.958	110.292	2216.17	590.083	2310.62
618	9	wt9_72h_3	66.875	168.75	323.542	34.625	135.833	11.583	189.5	42.625	136.875	672.375	368.583	36.583	183.958	57.875	17.167	21.5	1200.38	29.875	36.75	249.167	214.708	1732.42	615.917	2380.83
619	9	MT-△slr1983_72h_1	34.4804	109.098	364.874	44.8615	223.139	10.4028	211.244	46.1164	123.508	720.715	434.631	33.4291	293.09	53.8606	25.9444	19.815	876.24	42.0959	58.235	225.302	182.757	2085.62	646.655	2709.04
620	9	MT-△slr1983_72h_2	94.2729	141.431	366.071	39.7516	260.96	8.98423	173.966	57.2185	152.746	739.218	514.807	54.4902	217.206	56.8095	29.811	17.8495	891.531	42.7219	60.2243	214.665	130.709	2246.66	722.49	2543.75
621	9	MT-△slr1983_72h_3	82.0481	143.232	359.862	55.317	188.861	13.7128	248.523	45.7252	161.515	794.199	468.874	38.5104	241.406	50.9107	32.4468	24.872	1127.99	41.4683	56.2433	255.963	234.805	2248.67	779.946	2552.21
622	9	MT-△slr1760_72h_1	57.7155	111.331	590.292	42.1419	206.3	12.542	227.795	48.4779	151.041	615.167	277.375	43.292	178.078	60.5446	42.1467	17.458	1508.05	33.5581	44.708	170.458	180.608	1753.22	598.291	2266.12
623	9	MT-△slr1760_72h_2	41.279	133.627	431.083	35.8688	156.937	14.125	169.452	17.4141	130.627	765.75	454.75	24.667	178.938	27.2601	27.6418	22.125	1360.96	26.6319	32.125	200.542	152.412	1675.59	667.469	2212.43
624	9	MT-△slr1760_72h_3	76.5431	106.74	589.583	37.0482	228.623	14.792	246.672	44.1872	166.246	700.75	464.917	43.125	159.42	40.1521	30.7479	14.875	1462.07	32.6801	54.75	180.042	142.46	1772.83	531.526	2188.78
625	9	MT-△sll5059_72h_1	48.9741	133.48	502.042	63.4007	201.553	15.958	215.333	42.5811	166.723	803.25	445.625	71.958	136.39	60.0523	26.7414	22.333	1839.2	54.727	54.375	653.292	116.417	1965.6	568.856	2750.57
626	9	MT-△sll5059_72h_2	53.6434	174.141	559.542	33.8312	178.729	14.25	271.683	52.0412	237.165	775.542	610.25	117.542	218.974	72.6158	28.9776	11.833	1760.27	75.7984	35.25	604.125	93.1266	2140.87	869.551	2923.66
627	9	MT-△sll5059_72h_3	47.8534	150.045	378.083	51.0155	174.748	20.167	209.093	34.7776	149.411	567.792	494.333	94.542	203.552	34.4799	19.8151	16.5	1707.51	59.8646	35.625	474.458	93.6915	2079.41	737.034	2671.71
628	9	MT-△slr1213_72h_1	35.3428	121.61	449.482	42.868	208.312	13.1033	254.632	85.1777	107.84	748.444	435.785	76.7337	193.509	39.6155	25.7834	18.2169	1559.9	106.812	45.3934	361.371	141.439	1911.13	634.196	2289.56
629	9	MT-△slr1213_72h_2	39.2576	117.94	506.753	64.203	221.772	31.7899	258.99	40.6243	130.399	684.78	492.562	58.9326	102.068	31.1506	21.372	12.7439	1373.59	57.9829	47.9538	225.665	154.233	1940.99	617.462	2088.82
630	9	MT-△slr1213_72h_3	51.4659	88.9453	578.793	36.5779	126.832	18.7643	259.593	42.798	229.922	581.314	467.494	48.345	75.0281	20.928	22.6316	25.5037	1435.04	80.1647	38.327	197.961	201.045	1813.15	636.138	2014.4
631	10	wt10_72h_1	52.75	34	263.458	91.292	698.958	76.583	611.833	51.708	138.625	108.167	1564.75	133.5	235.5	139.042	138.292	136.292	1717.58	220.667	298.458	1095.58	661.708	19606.7	545.292	7339.62
632	10	wt10_72h_2	49.083	67.625	375.125	82	728.333	75.292	773.375	62.5	150.083	83.667	1549.08	145.917	210.708	123.25	116.708	94.875	1830.29	229.542	238.292	987.333	618.292	22281.4	506.083	6856.71
633	10	wt10_72h_3	52.083	64.625	405.833	95.25	863.917	71.375	774.25	55.75	130.792	80.917	1461.92	133.667	240.292	109.167	151.292	109.5	1865.21	250.208	255.75	894.833	615.292	22644.5	607.875	6978.83
634	10	MT-△slr0947_72h_1	45.5373	47.1922	297.738	79.8678	759.717	80.9532	1006.63	41.4192	139.1	85.066	1856.95	144.158	215.871	143.103	102.797	115.399	2309.84	233.471	228.178	1055.96	413.267	20581.9	464.627	5651.98
635	10	MT-△slr0947_72h_2	41.8943	43.9745	320.515	95.9581	795.031	117.441	951.5	31.4658	132.01	84.7033	1573.82	122.987	218.555	131.94	122.377	105.784	2058.68	211.609	135.792	842.506	317.365	21392.7	522.107	5885.95
636	10	MT-△slr0947_72h_3	42.5012	55.7745	356.462	84.4988	774.359	82.0943	1152.21	33.0712	121.988	84.9747	1734.81	132.579	207.826	147.164	132.167	103.377	2220.48	182.717	211.482	1041.82	187.849	22311.6	546.058	5287.66
637	10	MT-△sll0396_72h_1	89.448	51.8144	315.117	86.327	1068.69	58.7908	800.639	66.8783	175.026	88.291	1644.54	141.027	179.48	160.386	292.79	198.598	1047.74	242.031	648.947	574.633	1056.51	18385.6	622.432	6690.81
638	10	MT-△sll0396_72h_2	76.0894	34.2095	273.233	79.744	923.136	55.6405	591.051	58.3441	143.475	122.973	1290.02	159.233	201.738	187.737	187.607	182.359	1025.27	217.781	575.552	549.298	1397.53	20946.4	556.504	6575.93
639	10	MT-△sll0396_72h_3	79.9973	57.3849	214.691	92.0769	975.498	77.8491	698.593	47.108	140.863	91.4392	1565.35	122.668	210.933	199.405	222.692	200.086	1069.7	305.114	638.45	556.233	967.449	20901.9	574.269	6336.66
640	10	MT-△sll0797_72h_1	46.6651	30.4201	243.906	76.2804	713.639	96.1402	708.01	31.0833	120.521	95.5408	1525.69	119.621	249.144	131.246	150.1	99.7961	2283.88	252.177	202.269	1210.74	632.23	21175	548.873	6811.12
641	10	MT-△sll0797_72h_2	43.4211	43.0106	316.254	104.686	690.809	83.6129	756.012	83.771	140.186	88.9192	1252.8	127.198	268.987	140.861	125.752	102.15	2130.66	195.272	282.133	1112.57	701.313	28973.6	494.789	7194.7
642	10	MT-△sll0797_72h_3	50.8029	50.3649	416.969	95.4025	668.552	86.149	697.505	67.6802	180.121	80.0878	1532.7	161.889	261.731	151.826	144.429	117.895	1901.41	194.321	292.393	1090.16	984.074	22087.1	588.351	7585.32
643	10	MT-△sll1330_72h_1	54.5318	64.9639	487.684	126.65	801.421	44.8802	1231.79	137.909	147.209	216.94	760.503	126.808	239.473	109.406	108.889	134.012	1464.17	240.765	193.903	937.974	1732.26	22716	486.499	7154.99
644	10	MT-△sll1330_72h_2	26.3084	87.9173	345.437	84.4564	817.885	59.9435	1307.01	83.3316	131.679	187.616	939.325	128.918	289.306	89.2661	119.702	139.465	1294.89	232.837	215.447	765.713	1991.48	23153.5	414.254	7705.27
645	10	MT-△sll1330_72h_3	41.7102	67.5259	421.021	107.596	818.316	50.8745	1141.61	106.858	132.221	159.865	867.251	148.686	201.25	100.817	94.6735	149.135	1250.76	205.577	194.219	809.449	1474.44	22882.7	456.89	6615.7
646	11	wt11_72h_1	93.542	24.833	908.875	54.417	657.75	41.458	485.5	136.958	899.583	10.917	1142.62	73.25	15.917	181	80.083	38.958	1736.33	62.625	141.792	1248.62	462.375	4665.75	169.25	4112.62
647	11	wt11_72h_2	83.667	22.625	788.208	41.042	679.5	50.125	555.292	95.333	744.458	11.292	1321.46	79.75	20.417	160.417	67.25	26.25	2035.29	54.25	138.333	1287.92	344.958	5387.38	178.125	4381.58
648	11	wt11_72h_3	113.875	17.708	1019.88	46.042	657.333	45.458	612.458	112.458	966.125	11.833	1129.33	67.292	14.792	186.542	76.542	39.292	1868.75	47.25	148.292	1423.71	323.208	4958.17	178	4039.38
649	11	MT-△sll1708_72h_1	61.0823	19.2644	691.19	34.4422	470.568	55.3023	546.814	109.515	684.572	15.64	617.372	65.6456	8.80435	181.725	68.2798	41.5063	1331.46	51.6103	165.929	992.431	260.933	4742.43	258.904	4135.66
650	11	MT-△sll1708_72h_2	60.887	21.9677	842.856	26.0832	579.753	51.774	562.534	82.2374	525.134	10.4997	799.764	98.1785	10.6409	205.989	97.6094	36.9648	1482.91	77.4157	56.548	1193.45	182.997	4393.11	352.679	3186.67
651	11	MT-△sll1708_72h_3	80.683	17.79	892.271	31.671	489.235	39.2973	543.321	127.273	703.996	13.2067	664.892	78.7845	10.2945	151.876	76.1229	37.8232	1343.32	58.0845	156.302	1034.02	319.776	5229.42	237.105	3880.58
652	11	MT-△slr0312_72h_1	92.7791	20.3836	750.295	51.671	721.034	34.6014	481.004	130.321	931.85	14.0494	958.213	107.056	14.06	148.133	64.0678	36.0465	2327.43	64.682	130.814	2123.43	399.475	5542.75	268.946	5322.08
653	11	MT-△slr0312_72h_2	76.7095	18.8799	620.558	58.9065	632.374	31.2503	517.387	105.79	633.211	9.89505	1368.03	108.016	16.7038	162.757	86.0068	34.3163	2345.25	54.884	220.243	2291.3	314.33	5399.07	191.785	5340.85
654	11	MT-△slr0312_72h_3	91.909	21.3745	742.782	42.6215	669.205	23.9334	425.504	126.534	806.27	12.8713	1210.19	88.1216	17.8789	162.847	73.34	41.9625	2359.08	47.1501	143.041	2380.97	378.441	4577.15	223.705	4485.21
655	11	MT-△sll0485_72h_1	120.25	16.9065	718.511	53.4226	588.858	44.8157	579.861	112.069	737.125	11.3878	901.915	66.011	25.1158	240.593	99.4998	36.1383	1702.84	50.3035	115.608	1683.34	440.669	4578.28	210.471	4430.57
656	11	MT-△sll0485_72h_2	100.934	18.7348	761.95	53.1098	561.312	52.2862	540.631	140.126	1085.97	12.7778	864.534	64.6814	24.6752	204.262	73.2474	24.4854	1895.76	68.9237	127.993	1636.1	341.453	4506.57	126.427	4306.97
657	11	MT-△sll0485_72h_3	147.165	24.04	1189.3	49.4605	745.97	34.4514	654.479	181.711	1284.46	12.4288	1221.93	78.0269	23.2597	210.167	85.0882	33.224	2462.37	73.879	157.071	2385.63	374.96	4345.09	168.271	4106.49
658	11	MT-△sll0039_72h_1	76.9615	7.0506	625.51	36.2279	622.812	29.5069	535.841	60.5765	870.914	11.5393	907.732	68.0416	25.2631	140.292	74.1966	27.3508	1835.24	51.239	144.502	1317.95	365.017	4761.77	140.457	3845.57
659	11	MT-△sll0039_72h_2	85.1328	12.4465	913.865	42.8805	610.124	46.355	606.944	74.5684	985.35	11.027	876.852	78.7657	23.6904	166.564	73.2324	32.5222	1983.69	54.4196	139.412	1708.21	314.289	4615.09	185.001	3775.9
660	11	MT-△sll0039_72h_3	59.5981	9.08117	856.968	30.414	545.305	36.1356	565.036	81.9206	944.987	9.34875	785.247	66.4912	27.9321	169.455	85.8484	23.6096	1742.37	49.1384	130.059	1340.08	436.044	4296.27	170.866	4180.71
